# Supplementary material for: Consistent and reproducible long-term in vitro growth of health and disease-associated oral subgingival biofilms
Source: BMC Microbiol. 2018 Jul 11;18:70. doi: 10.1186/s12866-018-1212-x (PMC6042318; doi:10.1186/s12866-018-1212-x)
Supplement: Supplementary file 1 — Table S1. Per sample total read counts and absolute read counts for each species and genus detected (species table from HOMINGS analysis). (XLSX 180 kb) [file 12866_2018_1212_MOESM1_ESM.xlsx]

## Sheet: Species table
		Own identifiers	DB2.G1	DB2.G2	DB2.G3	DB2.G4	DB2.G5	DB2.G6	DB2.G7	DB2.G8	DB2.G9	DB2.G10	DB3.G0	DB3.G1	DB3.G2	DB3.G3	DB3.G4	DB3.G5	DB3.G6	DB3.G7	DB3.G8	DB3.G9	DB3.G10	HB1.G1	HB1.G2	HB1.G3	HB1.G4	HB1.G5	HB1.G6	HB1.G7	HB1.G8	HB1.G9	HB1.G10	HB2.G1	HB2.G2	HB2.G3	HB2.G4	HB2.G5	HB2.G6	HB2.G7	HB2.G8	HB2.G9	HB2.G10
		Types of Read Count \ Sample ID	I.25	I.26	I.27	I.28	I.29	I.30	I.31	I.32	I.33	I.34	I.36	I.51	I.79	I.59	I.70	I.107	I.128	I.146	I.164	I.188	I.206	I.1	I.2	I.3	I.4	I.5	I.6	I.7	I.8	I.9	I.10	I.11	I.12	I.13	I.14	I.15	I.16	I.17	I.18	I.19	I.20	Row Sum
		Total reads	104678	61024	87273	76196	70792	69015	79999	70398	96016	50227	72119	52916	122693	109705	109035	90170	96857	124907	101842	108066	87626	164604	118421	122611	117616	84763	80073	101472	134559	134843	141610	135679	113844	111604	135702	135159	134068	110339	93676	114843	126524	4253564
		Reads matched uniquely with 1 species probe	49018	29484	51919	30497	35604	28161	26138	23592	31835	20293	35620	27883	68373	48703	37277	33455	40555	46343	35282	38936	27925	76093	39688	38806	39909	28801	27896	28465	40548	39852	40926	66205	34674	31495	48780	37182	40933	30562	35059	30911	31676	1555354
		Reads matched uniquely with 1 genus probe	16058	12369	17061	20950	18923	13485	12772	9109	11163	7291	11869	3395	10284	7444	17004	12508	9957	12174	10267	17441	9207	51387	21926	25738	28469	23725	18527	26812	22250	26522	27601	52767	34163	22648	14975	18295	14599	24042	19338	46580	47168	828263
		Unmatched reads	39602	19171	18293	24749	16265	27369	41089	37697	53018	22643	24630	21638	44036	53558	54754	44207	46345	66390	56293	51689	50494	37124	56807	58067	49238	32237	33650	46195	71761	68469	73083	16707	45007	57461	71947	79682	78536	55735	39279	37352	47680	1869947
			DB2.G1	DB2.G2	DB2.G3	DB2.G4	DB2.G5	DB2.G6	DB2.G7	DB2.G8	DB2.G9	DB2.G10	DB3.G0	DB3.G1	DB3.G2	DB3.G3	DB3.G4	DB3.G5	DB3.G6	DB3.G7	DB3.G8	DB3.G9	DB3.G10	HB1.G1	HB1.G2	HB1.G3	HB1.G4	HB1.G5	HB1.G6	HB1.G7	HB1.G8	HB1.G9	HB1.G10	HB2.G1	HB2.G2	HB2.G3	HB2.G4	HB2.G5	HB2.G6	HB2.G7	HB2.G8	HB2.G9	HB2.G10
Probe ID	HOT	Organism Name	I.25	I.26	I.27	I.28	I.29	I.30	I.31	I.32	I.33	I.34	I.36	I.51	I.79	I.59	I.70	I.107	I.128	I.146	I.164	I.188	I.206	I.1	I.2	I.3	I.4	I.5	I.6	I.7	I.8	I.9	I.10	I.11	I.12	I.13	I.14	I.15	I.16	I.17	I.18	I.19	I.20	Row Sum
AB-01	389	Abiotrophia_defectiva	0	0	0	0	0	0	0	0	0	0	5	0	0	0	0	0	0	0	0	0	0	0	0	0	1	0	0	0	0	0	0	0	0	0	0	0	0	0	0	0	0	6
AC-01	554	Acinetobacter_baumannii	0	0	0	0	0	0	0	0	0	0	0	0	0	0	0	0	0	0	0	0	0	0	0	0	0	0	0	0	0	0	0	0	0	0	0	0	0	0	0	0	0	0
AC-02	408	Acinetobacter_sp_HOT_408	0	0	0	0	0	0	0	0	0	0	0	0	0	0	0	0	0	0	0	0	0	0	0	0	0	0	0	0	0	0	0	0	0	0	0	0	0	0	0	0	0	0
AC-03	183	Actinobaculum_sp_HOT_183	0	0	0	0	0	0	1	0	0	0	0	0	0	0	0	0	0	0	1	0	0	0	0	1	0	0	0	0	0	0	0	1	0	0	0	0	0	0	0	0	0	4
AC-04	850	Actinomyces_cardiffensis	0	0	0	0	0	0	0	0	0	0	0	0	0	0	0	0	0	0	0	0	0	0	0	0	0	0	0	0	0	0	0	0	0	0	0	0	0	0	0	0	0	0
AC-42	888	Actinomyces_dentalis	0	0	0	0	0	0	0	0	0	0	0	0	0	0	0	0	0	0	0	0	0	0	0	0	0	0	0	0	0	0	0	0	0	0	0	0	0	0	0	0	0	0
AC-06	617	Actinomyces_georgiae	0	0	0	0	0	0	0	0	0	0	3	0	0	0	0	0	0	0	0	0	0	0	0	0	0	0	0	0	0	0	0	0	0	0	0	0	0	0	0	0	0	3
AC-07	618	Actinomyces_gerencseriae	0	0	0	0	0	0	0	0	0	0	1	0	0	0	0	0	0	0	0	0	0	0	0	0	0	0	0	0	0	0	0	0	0	0	0	0	0	0	0	0	0	1
AC-35	866	Actinomyces_graevenitzii	0	1	0	0	0	0	0	0	0	0	0	1	0	0	0	0	0	0	0	0	0	0	0	0	0	0	1	0	1	0	0	0	0	0	0	0	0	0	0	0	0	4
AC-09	645	Actinomyces_israelii	0	0	0	0	1	0	0	0	0	0	47	1	0	1	0	0	0	0	0	0	0	0	0	0	0	0	0	0	0	0	0	0	0	0	0	0	1	0	0	0	0	51
AC-10	849	Actinomyces_johnsonii	0	0	0	0	0	0	0	0	0	0	0	0	0	0	0	0	0	0	0	0	0	7	0	0	0	0	0	0	0	0	0	0	0	0	0	0	0	0	0	0	0	7
AC-24	181	Actinomyces_lingnae	6	0	0	0	0	0	0	0	0	0	0	0	0	0	1	1	0	0	99	0	0	0	0	0	0	0	0	0	0	0	0	0	1	0	0	0	0	0	0	0	2	110
AC-11	852	Actinomyces_massiliensis	0	0	0	0	0	0	0	0	0	0	0	0	0	0	0	0	0	0	0	0	0	0	0	0	0	0	0	0	0	0	0	0	0	0	0	0	0	0	0	0	0	0
AC-12	671	Actinomyces_meyeri	0	0	0	0	0	0	0	0	0	0	59	0	0	0	0	0	2	0	0	0	0	0	1	0	0	0	0	0	0	0	0	1	2	0	0	0	0	0	0	1	0	66
AC-13	176	Actinomyces_naeslundii	0	0	0	0	0	0	0	0	0	0	0	0	0	0	0	0	0	0	0	0	0	0	0	0	0	0	0	0	0	0	0	0	0	0	0	0	0	0	0	0	0	0
AC-36	176	Actinomyces_naeslundii	0	0	0	0	0	0	0	0	0	0	0	0	0	0	0	0	0	0	0	0	0	0	0	0	0	0	0	0	0	0	0	10	2	0	0	0	0	0	0	0	0	12
AC-38	701	Actinomyces_odontolyticus	0	0	0	0	0	0	0	0	0	0	0	0	0	0	0	0	0	0	0	0	0	0	0	0	0	0	0	1	0	1	0	0	0	0	0	0	0	0	0	0	0	2
AC-43	701	Actinomyces_odontolyticus	0	0	0	0	0	0	0	0	0	0	0	0	0	0	0	0	0	1	0	0	0	0	0	0	0	0	0	0	0	0	0	0	0	0	0	0	0	0	0	0	0	1
AC-15	708	Actinomyces_oricola	0	0	0	0	0	0	0	0	0	0	1	0	0	0	0	0	0	0	0	0	0	0	0	0	0	0	0	0	0	0	0	0	0	0	0	0	0	0	0	0	0	1
AC-44	893	Actinomyces_oris	0	0	0	0	0	0	0	0	0	0	0	0	0	0	0	0	0	0	0	0	0	0	0	0	0	0	0	0	0	0	0	0	0	0	0	0	0	0	0	0	0	0
AC-45	893	Actinomyces_oris	0	0	0	0	0	0	0	0	0	0	2	0	0	0	0	0	0	0	0	0	0	0	0	0	0	0	0	0	0	0	0	2	2	0	0	0	0	0	0	0	0	6
AC-16	746	Actinomyces_radicidentis	0	0	0	0	0	0	0	0	0	0	0	0	0	0	0	0	0	0	0	0	0	0	0	0	0	0	0	0	0	0	0	0	0	0	0	0	0	0	0	0	0	0
AC-39	746	Actinomyces_radicidentis	0	0	0	0	0	0	0	0	0	0	0	0	0	0	0	0	0	0	0	0	0	0	0	0	0	0	0	0	0	0	0	0	0	0	0	0	0	0	0	0	0	0
AC-18	170	Actinomyces_sp_HOT_170	0	0	0	0	0	0	0	0	0	0	0	0	0	0	0	0	0	0	0	0	0	0	0	0	0	0	0	0	0	0	0	1	0	0	0	0	0	0	0	0	0	1
AC-19	171	Actinomyces_sp_HOT_171	0	0	0	0	0	0	1	0	0	0	0	0	0	0	0	0	0	0	0	0	0	0	0	0	0	0	0	0	0	0	0	0	0	0	0	0	0	0	0	0	0	1
AC-20	172	Actinomyces_sp_HOT_172	0	1	0	0	0	0	0	0	0	0	0	1	0	0	1	0	0	0	0	0	0	0	0	0	0	0	0	2	0	0	1	0	1	0	0	0	0	0	0	0	0	7
AC-21	175	Actinomyces_sp_HOT_175	0	0	0	0	0	0	0	0	0	0	0	0	0	0	0	0	0	0	0	0	0	0	0	1	0	0	1	0	0	0	0	0	3	0	0	0	0	0	0	0	0	5
AC-22	178	Actinomyces_sp_HOT_178	0	0	0	1	0	0	0	0	0	0	1	0	0	0	0	0	1	0	0	0	0	0	0	0	0	0	0	0	0	0	0	0	0	0	0	0	0	0	0	0	0	3
AC-23	180	Actinomyces_sp_HOT_180	0	0	0	0	0	0	0	0	0	0	0	0	0	0	0	0	0	0	0	0	0	0	0	0	0	0	0	0	0	0	0	0	0	0	0	0	0	0	0	0	0	0
AC-25	414	Actinomyces_sp_HOT_414	0	0	0	0	0	0	0	0	0	0	1	0	0	0	0	0	0	0	0	0	0	0	0	0	0	0	0	0	0	0	0	0	0	0	0	0	0	0	0	0	0	1
AC-27	448	Actinomyces_sp_HOT_448	0	0	0	0	0	1	2	0	0	0	0	0	0	0	0	0	0	0	0	0	0	0	0	0	0	0	0	0	1	0	0	1	0	0	0	0	0	0	1	0	0	6
AC-28	525	Actinomyces_sp_HOT_525	0	0	0	0	0	0	0	0	0	0	0	0	0	0	0	0	0	0	0	0	0	0	0	0	0	0	0	0	0	0	0	0	0	0	0	0	0	0	0	0	0	0
AC-40	525	Actinomyces_sp_HOT_525	0	0	0	0	0	0	0	0	0	0	0	0	0	0	0	0	0	0	0	0	0	0	0	0	0	0	0	0	0	0	0	0	0	0	0	0	0	0	0	0	0	0
AC-29	848	Actinomyces_sp_HOT_848	0	0	0	0	0	0	0	0	0	0	0	0	0	0	0	0	0	0	0	0	0	0	0	0	0	0	0	0	0	0	0	0	0	0	0	0	0	0	0	0	0	0
AC-30	877	Actinomyces_sp_HOT_877	0	0	0	0	0	0	0	0	0	0	0	0	0	0	0	0	0	0	0	0	0	0	0	0	0	0	0	0	0	0	0	1	0	0	0	0	0	0	0	0	0	1
AC-31	896	Actinomyces_sp_HOT_896	0	0	0	0	0	0	0	0	0	0	0	0	0	0	0	0	0	0	0	0	0	0	0	0	0	0	0	0	0	0	0	0	0	0	0	0	0	0	0	0	0	0
AC-32	897	Actinomyces_sp_HOT_897	0	0	0	0	0	0	0	0	0	0	0	0	0	0	0	0	0	0	0	0	0	0	0	0	0	0	0	0	0	0	0	0	0	0	0	0	0	0	0	0	0	0
AC-33	179	Actinomyces_timonensis	0	0	0	0	0	0	0	0	0	0	0	0	0	0	0	0	0	0	0	0	0	0	0	0	0	0	0	0	0	0	0	0	0	0	0	0	0	0	0	0	0	0
AC-41	179	Actinomyces_timonensis	0	0	0	0	0	0	0	0	0	0	0	0	0	0	0	0	0	0	0	0	0	0	0	0	0	0	0	0	0	0	0	0	0	0	0	0	0	0	0	0	0	0
AC-34	688	Actinomyces_viscosus	0	0	0	0	0	0	0	0	0	0	1	0	0	0	0	0	0	0	0	0	0	0	0	0	0	0	0	0	0	0	0	0	0	0	0	0	0	0	1	0	0	2
AG-01	531	Aggregatibacter_actinomycetemcomitans	23	0	0	0	0	0	0	0	0	0	89	0	0	0	0	0	0	0	0	0	0	0	0	0	0	0	1	0	0	0	0	0	0	0	0	0	0	0	0	0	0	113
AG-03	720	Aggregatibacter_paraphrophilus	0	0	0	0	0	0	0	0	0	0	0	0	0	0	0	0	0	0	0	0	0	0	0	0	0	0	0	0	0	0	0	0	0	0	0	0	0	0	0	0	2	2
AG-09	720	Aggregatibacter_paraphrophilus	0	0	0	0	0	0	0	0	0	0	0	0	0	0	0	0	0	0	0	0	0	0	0	0	0	0	0	0	0	0	0	0	0	0	0	0	0	0	0	0	0	0
AG-06	513	Aggregatibacter_sp_HOT_513	36	0	0	0	0	0	0	0	0	0	0	0	0	0	0	0	0	0	0	0	0	0	0	0	0	0	1	0	0	0	0	0	0	0	0	1	0	0	1	0	0	39
AG-10	949	Aggregatibacter_sp_HOT_949	0	0	0	0	0	0	0	0	0	0	0	0	0	0	0	0	0	0	0	0	0	0	0	0	0	0	0	0	0	0	0	0	0	0	0	0	0	0	0	0	0	0
AG-07	485	Agrobacterium_tumefaciens	0	0	0	0	0	0	0	0	0	0	0	0	0	0	0	0	0	0	0	0	0	0	0	0	0	0	0	0	0	1	0	0	0	0	0	1	0	0	0	0	0	2
AL-01	831	Alloiococcus_otitis	0	0	0	0	0	0	0	0	0	0	0	0	0	0	0	0	0	0	0	0	0	0	0	0	0	0	0	0	0	0	0	0	0	0	0	0	0	0	0	0	0	0
AL-02	302	Alloprevotella_rava	4	3	2	0	0	0	1	0	0	0	0	1	0	0	1	0	0	0	0	0	0	0	0	0	0	0	0	0	0	0	0	0	0	1	0	0	0	0	0	0	0	13
AL-03	308	Alloprevotella_sp_HOT_308	0	0	0	0	0	0	0	0	0	0	0	0	0	0	0	0	0	0	0	0	0	0	0	0	0	0	0	0	0	0	0	0	0	1	0	2	0	0	1	0	0	4
AL-04	473	Alloprevotella_sp_HOT_473	0	0	0	0	0	0	4	0	0	0	0	0	0	0	0	0	0	0	0	0	0	0	0	2	0	0	0	0	0	0	0	0	0	0	0	0	0	0	0	0	0	6
AL-12	912	Alloprevotella_sp_HOT_912	0	0	0	0	0	0	0	0	0	0	0	0	0	0	0	0	0	0	0	0	0	0	0	0	0	0	0	0	0	0	0	0	0	0	0	0	0	0	0	0	0	0
AL-08	914	Alloprevotella_sp_HOT_914	0	0	0	0	0	0	0	0	0	0	0	0	0	0	0	0	0	0	0	0	0	0	0	0	0	0	0	0	0	0	0	0	0	0	0	0	0	0	0	0	0	0
AL-11	914	Alloprevotella_sp_HOT_914	0	0	1	0	0	0	0	0	1	0	0	0	0	0	0	0	0	0	0	0	0	0	0	1	0	0	0	0	0	2	0	0	0	0	0	0	0	0	0	0	0	5
AL-09	466	Alloprevotella_tannerae	148	1	0	0	0	0	2	0	0	0	6	0	0	0	0	0	0	0	1	0	0	0	0	1	0	0	4	0	0	1	0	1	3	0	0	1	0	0	0	0	0	169
AL-10	198	Alloscardovia_omnicolens	0	0	0	0	0	0	0	0	0	0	0	0	0	0	0	0	0	0	0	0	0	0	0	0	0	0	0	0	0	0	0	0	0	0	0	0	0	0	0	0	0	0
AN-01	859	Anaerococcus_lactolyticus	0	0	0	0	0	0	0	0	0	0	0	0	0	0	0	0	0	0	0	0	0	0	0	0	0	0	0	0	0	0	0	0	0	0	0	0	0	0	0	0	0	0
AN-03	122	Megasphaera_micronuciformis	171	20	15	12	46	0	1	0	0	0	1	714	698	1717	172	99	0	449	26	272	197	1	0	1	1	0	0	0	2	0	1	1	0	1	0	2	0	0	0	0	1	4621
CH-02	439	Anaerolineae[G-1]_sp_HOT_439	0	0	0	0	0	0	0	0	0	0	23	0	0	0	0	0	0	0	0	0	0	0	0	0	0	0	0	0	0	0	0	0	0	0	0	0	0	0	0	0	0	23
CH-03	439	Anaerolineae[G-1]_sp_HOT_439	0	0	0	0	0	0	0	0	0	0	0	0	0	0	0	0	0	0	0	0	0	0	0	0	0	0	0	0	0	0	0	0	0	0	0	0	0	0	0	0	0	0
AR-01	811	Arcanobacterium_haemolyticum	0	0	0	0	0	0	0	0	0	0	0	0	0	0	0	0	0	0	0	0	0	0	0	0	0	0	0	0	0	0	0	0	0	0	0	0	0	0	0	0	0	0
AR-02	190	Arsenicicoccus_bolidensis	0	0	0	0	0	0	0	0	0	0	0	0	0	0	0	0	0	0	0	0	0	0	0	0	0	0	0	0	0	0	0	0	0	0	0	0	0	0	0	0	0	0
AT-01	674	Atopobium_minutum	0	0	0	0	0	0	0	0	0	0	0	0	0	0	0	0	0	0	0	0	0	0	0	0	0	0	0	0	0	0	0	0	0	0	0	0	0	0	0	0	0	0
AT-02	723	Atopobium_parvulum	1	2	1	12	29	6	20	92	182	169	0	319	69	511	108	272	183	359	311	250	490	0	9	476	322	134	75	127	202	254	214	273	357	913	419	444	167	118	198	157	172	8417
AT-08	723	Atopobium_parvulum	163	33	125	85	20	0	146	81	40	32	0	0	0	3	1	3	0	1	0	2	1	0	0	2	6	2	0	2	11	4	8	0	1	6	10	16	6	2	7	2	5	826
AT-03	750	Atopobium_rimae	0	1	0	1	0	0	0	0	1	1	0	6	5	35	19	3	0	1	1	2	7	0	0	785	2033	1794	1698	1543	3255	3320	3963	1	197	2709	3414	4062	2290	1210	5154	2566	2069	42146
AT-09	750	Atopobium_rimae	0	0	0	0	0	0	0	0	0	0	0	0	0	1	0	1	1	0	0	0	0	0	0	0	1	1	0	0	0	0	0	0	0	0	0	0	1	0	0	0	0	6
AT-04	199	Atopobium_sp_HOT_199	0	0	0	0	0	0	0	0	0	0	31	0	0	0	0	0	0	0	0	0	0	0	0	0	0	0	0	0	0	0	2	0	0	0	0	0	1	0	1	1	1	37
AT-05	416	Atopobium_sp_HOT_416	0	0	0	0	0	0	0	0	0	0	0	0	0	0	0	0	0	0	0	0	0	0	0	0	0	0	0	0	0	0	0	0	0	0	0	0	0	0	0	0	0	0
AT-06	810	Atopobium_sp_HOT_810	0	0	0	0	0	0	0	0	0	0	0	0	0	0	0	0	0	0	0	0	0	0	0	0	0	0	0	0	0	0	0	0	0	0	0	0	0	0	0	0	0	0
AT-07	814	Atopobium_vaginae	0	0	0	0	0	0	0	0	0	0	0	0	0	0	0	0	0	0	0	0	0	0	0	0	0	0	0	0	0	0	0	0	0	0	0	0	0	0	0	0	0	0
BA-01	45	Bacillus_clausii	0	0	0	0	0	0	0	0	0	0	0	0	0	0	0	0	0	0	0	0	0	0	0	0	0	0	0	0	0	0	0	0	0	0	0	0	0	0	0	0	0	0
BA-02	272	Bacteroidaceae[G-1]_sp_HOT_272	3	1	1	4	2	2	1	4	3	0	0	1	6	0	2	2	1	4	1	2	0	1	4	4	2	1	0	2	3	4	1	1	2	4	5	0	4	1	0	2	3	84
BA-03	274	Bacteroidales[G-2]_sp_HOT_274	1	0	0	0	0	1	0	0	0	0	1021	0	0	0	0	0	0	0	0	2	0	1	0	0	3	0	3	0	0	0	0	1	0	1	0	1	1	0	0	0	0	1036
BA-05	630	Bacteroides_heparinolyticus	634	1142	6585	3793	4612	2662	363	721	1812	2268	18	1	0	0	0	0	0	0	1	0	0	0	0	0	1	0	0	0	0	0	0	1	2	0	0	0	1	0	0	0	1	24618
BA-06	787	Bacteroides_pyogenes	0	0	0	0	0	0	0	0	0	0	0	0	0	0	0	0	0	0	0	0	0	0	0	0	0	0	0	0	0	0	0	0	0	0	0	0	0	0	0	0	0	0
BA-07	465	Bacteroides_zoogleoformans	0	1	0	0	0	0	0	0	0	0	0	0	0	0	0	0	0	0	0	0	0	0	0	0	0	0	0	0	0	0	0	0	0	0	0	0	0	0	0	0	0	1
BA-08	280	Bacteroidetes[G-3]_sp_HOT_280	0	0	0	0	0	0	0	0	0	0	39	0	1	0	0	0	0	0	0	0	0	0	0	0	0	0	0	0	0	0	0	0	0	0	0	0	0	0	0	0	0	40
BA-09	281	Bacteroidetes[G-3]_sp_HOT_281	0	0	0	0	0	0	0	0	0	0	0	0	0	0	0	0	0	0	0	0	0	0	0	0	0	0	0	0	0	0	0	0	0	0	0	0	0	0	0	0	0	0
BA-10	365	Bacteroidetes[G-3]_sp_HOT_365	0	0	0	0	0	0	0	0	0	0	4	0	0	0	0	0	0	0	0	0	0	0	0	0	0	0	0	0	0	0	0	0	0	0	0	0	0	0	0	0	0	4
BA-20	365	Bacteroidetes[G-3]_sp_HOT_365	0	0	0	0	0	0	0	0	0	0	0	0	0	0	0	0	0	0	0	0	0	0	0	0	0	0	0	0	0	0	0	0	0	0	0	0	0	0	0	0	0	0
BA-11	436	Bacteroidetes[G-3]_sp_HOT_436	0	0	0	0	0	0	0	0	0	0	0	0	0	0	0	0	0	0	0	0	0	0	0	0	0	0	0	0	0	0	0	0	0	0	0	0	0	0	0	0	0	0
BA-12	503	Bacteroidetes[G-3]_sp_HOT_503	0	0	0	0	0	0	0	0	0	0	24	0	0	0	0	0	0	0	0	0	0	0	0	0	0	0	0	0	0	0	0	0	0	0	0	0	0	0	0	0	0	24
BA-13	899	Bacteroidetes[G-3]_sp_HOT_899	0	0	0	0	0	0	0	0	0	0	0	0	0	0	0	0	0	0	0	0	0	0	0	0	0	0	0	0	0	0	0	0	0	0	0	0	0	0	0	0	0	0
BA-14	509	Bacteroidetes[G-4]_sp_HOT_509	0	0	0	0	0	0	0	0	0	0	25	0	0	0	0	0	0	0	0	0	0	0	0	0	0	0	0	0	0	0	0	0	0	0	0	0	0	0	0	0	0	25
BA-15	505	Bacteroidetes[G-5]_sp_HOT_505	0	0	0	0	0	0	0	0	0	0	0	0	0	0	0	0	0	0	0	0	0	0	0	0	0	0	0	0	0	0	0	0	0	0	0	0	0	0	0	0	0	0
BA-16	507	Bacteroidetes[G-5]_sp_HOT_507	0	0	0	0	0	0	0	0	0	0	0	0	0	0	0	0	0	0	0	0	0	0	0	0	0	0	0	0	0	0	0	0	0	0	0	0	0	0	0	0	0	0
BA-17	511	Bacteroidetes[G-5]_sp_HOT_511	0	0	0	0	0	0	0	1	0	0	75	0	0	0	0	0	0	0	0	0	0	0	0	0	2	0	0	3	0	0	0	0	0	0	0	0	0	0	0	0	0	81
BA-19	511	Bacteroidetes[G-5]_sp_HOT_511	0	0	0	0	0	0	0	0	0	0	0	0	0	0	0	0	0	0	0	0	0	0	0	0	0	0	0	0	0	0	0	0	0	0	0	0	0	0	0	0	0	0
BA-18	516	Bacteroidetes[G-6]_sp_HOT_516	0	0	0	0	0	0	0	0	0	0	78	0	0	0	0	0	0	0	0	0	0	0	0	0	0	0	0	0	0	0	0	0	0	0	0	0	0	0	0	0	0	78
BA-04	911	Bacteroidetes[G-7]_sp_HOT_911	0	0	0	0	0	0	0	0	0	0	0	0	0	0	0	0	0	0	0	0	0	0	0	0	0	0	0	0	0	0	0	0	0	0	0	0	0	0	0	0	0	0
BD-01	39	Bdellovibrio_sp_HOT_039	0	0	0	0	0	0	0	0	0	0	0	0	0	0	0	0	0	0	0	0	0	0	0	0	0	0	0	0	0	0	0	0	0	0	0	0	0	0	0	0	0	0
BE-01	319	Bergeyella_sp_HOT_319	0	0	0	0	0	0	0	0	0	0	0	0	0	0	0	0	0	0	0	0	0	0	0	0	0	0	0	0	0	0	0	0	0	0	0	0	0	0	0	0	0	0
BE-02	322	Bergeyella_sp_HOT_322	0	0	0	0	0	0	0	0	1	0	1	0	1	0	0	0	0	0	0	0	0	2	0	0	2	0	0	0	0	0	0	0	1	0	2	0	0	0	0	0	0	10
BE-03	900	Bergeyella_sp_HOT_900	0	0	0	0	0	0	0	0	0	0	3	0	0	0	0	0	0	0	0	0	0	0	0	0	0	0	0	0	0	0	0	0	0	0	0	0	0	0	0	0	0	3
BE-04	907	Bergeyella_sp_HOT_907	0	0	0	0	0	0	0	0	0	0	0	0	0	0	0	0	0	0	0	0	0	0	0	0	0	0	0	0	0	0	0	0	0	0	0	0	0	0	0	0	0	0
BE-05	931	Bergeyella_sp_HOT_931	0	0	0	0	0	0	0	0	0	0	0	0	0	0	0	0	0	0	0	0	0	0	0	0	0	0	0	0	0	0	0	0	0	0	0	0	0	0	0	0	0	0
BI-01	407	Bifidobacteriaceae[G-2]_sp_HOT_407	0	0	0	0	0	0	0	0	0	0	0	0	0	0	0	0	0	0	0	0	0	0	0	0	0	0	0	0	0	0	0	0	0	0	0	0	0	0	0	0	0	0
BI-02	895	Bifidobacterium_animalis_subsp_animalis	0	0	0	0	0	0	0	0	0	0	0	0	0	0	0	0	0	0	0	0	0	0	0	0	0	0	0	0	0	0	0	0	0	0	0	0	0	0	0	0	0	0
BI-03	895	Bifidobacterium_animalis_subsp_lactis	0	0	0	0	0	0	0	0	0	0	0	0	0	0	0	0	0	0	0	0	0	0	0	0	0	0	0	0	0	0	0	0	0	0	0	0	0	0	0	0	0	0
BI-04	889	Bifidobacterium_breve	0	0	0	0	0	0	0	0	0	0	0	0	0	0	0	0	0	0	0	0	0	0	0	0	0	0	0	0	0	0	0	0	0	0	0	0	0	0	0	0	0	0
BI-05	588	Bifidobacterium_dentium	0	0	0	0	0	2	4	0	0	0	0	41	0	2	1	6	2	0	0	2	3	0	0	0	0	0	0	0	0	0	0	0	0	0	0	0	0	0	0	0	0	63
BI-06	862	Bifidobacterium_longum	2	2	1	1	2	63	7	0	0	0	0	0	0	0	0	0	0	0	0	0	0	0	0	0	0	0	0	0	0	0	0	0	0	0	0	0	0	0	0	0	0	78
BI-07	891	Bifidobacterium_scardovii	0	0	0	0	0	0	0	0	0	0	0	0	0	0	0	0	0	0	0	0	0	0	0	0	0	0	0	0	0	0	0	0	0	0	0	0	0	0	0	0	0	0
BR-01	590	Brevundimonas_diminuta	0	0	0	0	0	0	0	0	0	0	0	0	0	0	0	0	0	0	0	0	0	0	0	0	0	0	0	0	0	0	0	0	0	0	0	0	0	0	0	0	0	0
BU-01	603	Bulleidia_extructa	0	0	0	0	0	0	0	0	0	0	111	0	0	0	0	0	0	0	0	0	0	0	0	0	0	0	0	0	0	0	0	0	0	0	0	0	0	0	0	0	0	111
LA-10	80	Butyrivibrio_sp_HOT_080	0	0	0	0	0	0	0	0	0	0	0	0	0	0	0	0	0	0	0	0	0	0	0	0	0	0	0	0	0	0	0	0	0	0	0	0	0	0	0	0	0	0
LA-12	90	Butyrivibrio_sp_HOT_090	0	0	0	0	0	0	0	0	0	0	0	0	0	0	0	0	0	0	0	0	0	0	0	0	0	0	0	0	0	0	0	0	0	0	0	0	0	0	0	0	0	0
LA-11	455	Butyrivibrio_sp_HOT_455	0	0	0	0	0	0	0	0	0	0	0	0	0	0	1	0	0	0	0	0	0	1	0	0	0	0	0	0	0	0	0	1	0	0	0	0	0	1	0	0	0	4
CA-01	575	Campylobacter_concisus	2	2	0	2	0	0	0	1	0	0	0	1	8	0	9	4	3	1	1	0	2	3	0	1	0	0	0	2	1	8	0	1	0	0	2	1	1	1	1	6	4	68
CA-03	580	Campylobacter_curvus	149	16	8	10	4	19	240	195	149	95	0	5	120	172	2562	836	1484	1656	473	416	128	0	0	0	2	0	0	0	0	1	1	0	0	0	0	1	0	0	0	0	1	8743
CA-04	623	Campylobacter_gracilis	9	0	0	0	0	16	1	1	0	0	242	119	144	106	193	257	416	453	678	599	800	695	41	23	18	4	7	21	9	15	5	0	0	0	3	1	3	2	1	0	0	4882
CA-06	44	Campylobacter_sp_HOT_044	0	0	0	0	0	0	1	0	0	0	2	0	0	0	0	0	0	0	0	0	0	0	0	0	0	0	0	0	0	0	0	0	0	0	0	0	0	0	0	0	0	3
CA-07	776	Campylobacter_sputorum	0	0	0	0	0	0	0	0	0	0	0	0	0	0	0	0	0	0	0	0	0	0	0	0	0	0	0	0	0	0	0	0	0	0	0	0	0	0	0	0	0	0
CA-08	842	Campylobacter_ureolyticus	0	0	0	0	0	0	0	0	0	0	0	0	0	0	0	0	0	0	0	0	0	0	0	0	0	0	0	0	0	0	0	0	0	0	0	0	0	0	0	0	0	0
CA-09	337	Capnocytophaga_gingivalis	12	0	0	0	0	0	0	0	0	0	2	5	0	0	0	0	0	0	0	0	0	0	5	21	18	22	34	81	117	57	78	0	15	418	594	266	112	111	126	69	27	2190
CA-10	325	Capnocytophaga_granulosa	0	0	0	0	0	0	0	0	0	0	0	0	0	0	0	0	0	0	0	0	0	0	0	0	0	0	0	0	0	0	0	0	0	0	0	0	0	0	0	0	0	0
CA-11	627	Capnocytophaga_haemolytica	0	0	1	0	0	0	0	0	0	0	0	0	1	0	0	0	0	0	0	0	0	0	0	0	0	0	0	1	0	0	0	0	0	0	0	0	0	0	0	0	0	3
CA-12	329	Capnocytophaga_leadbetteri	0	0	0	0	0	0	1	0	0	0	1	0	0	0	0	0	0	0	0	0	0	0	0	0	0	0	0	0	0	0	0	0	0	0	0	0	0	0	0	0	0	2
CA-13	700	Capnocytophaga_ochracea	0	0	0	0	0	0	0	0	0	0	0	0	0	0	0	0	0	0	0	0	0	0	0	0	0	0	1	0	0	0	0	0	0	0	0	0	0	0	0	0	0	1
CA-36	326	Capnocytophaga_sp_HOT_326	0	0	0	0	0	0	0	0	0	0	3	0	0	0	0	0	0	0	0	0	0	0	0	0	0	0	0	0	0	0	0	0	0	0	0	0	0	0	0	0	0	3
CA-17	332	Capnocytophaga_sp_HOT_332	0	0	0	0	0	0	0	0	0	0	0	0	0	0	0	0	0	0	0	0	0	0	0	0	0	0	0	0	0	0	0	0	0	0	0	0	0	0	0	0	0	0
CA-18	334	Capnocytophaga_sp_HOT_334	0	0	0	0	0	0	0	0	0	0	0	0	0	0	0	0	0	0	0	0	0	0	0	0	0	0	0	0	0	0	0	0	0	0	0	0	0	0	0	0	0	0
CA-19	335	Capnocytophaga_sp_HOT_335	0	0	0	0	0	0	0	0	0	0	0	0	0	0	0	0	0	0	0	0	0	0	0	0	0	0	0	0	0	0	0	0	0	0	0	0	0	0	0	0	0	0
CA-20	336	Capnocytophaga_sp_HOT_336	0	0	0	0	0	0	0	0	0	0	0	0	0	0	0	0	0	0	0	0	0	0	0	1	0	0	0	0	0	0	0	0	0	0	0	0	0	0	0	0	0	1
CA-21	338	Capnocytophaga_sp_HOT_338	19	39	125	36	85	19	150	128	92	159	13	51	147	658	1240	427	887	10	237	242	378	0	0	0	0	0	0	0	0	0	0	0	0	0	0	0	0	0	0	0	0	5142
CA-23	412	Capnocytophaga_sp_HOT_412	0	0	0	0	0	0	0	0	0	0	0	0	0	0	0	0	0	0	0	0	0	0	0	0	0	0	0	0	0	0	0	0	0	0	0	0	0	0	0	0	0	0
CA-24	863	Capnocytophaga_sp_HOT_863	0	0	0	0	0	0	0	0	0	0	0	0	0	0	0	0	0	0	0	0	0	0	0	0	0	0	0	0	0	0	0	0	0	0	0	0	0	0	0	0	0	0
CA-25	864	Capnocytophaga_sp_HOT_864	0	0	0	0	0	0	0	0	0	0	0	0	0	0	0	0	0	0	0	0	0	0	0	0	0	0	0	0	0	0	0	0	0	0	0	0	0	0	0	0	0	0
CA-26	878	Capnocytophaga_sp_HOT_878	0	0	0	0	0	0	0	0	0	0	0	0	0	0	0	0	0	0	0	0	0	0	0	0	0	0	0	0	0	0	0	0	0	0	0	0	0	0	0	0	0	0
CA-27	901	Capnocytophaga_sp_HOT_901	0	0	0	0	0	0	0	0	0	0	0	0	0	0	0	0	0	0	0	0	0	0	0	0	0	0	0	0	0	0	0	0	0	0	0	0	0	0	0	0	0	0
CA-28	902	Capnocytophaga_sp_HOT_902	0	0	0	0	0	0	0	0	0	0	0	0	0	0	0	0	0	0	0	0	0	0	0	0	0	0	0	0	0	0	0	0	0	0	0	0	0	0	0	0	0	0
CA-30	775	Capnocytophaga_sputigena	0	0	0	0	0	0	0	0	0	0	0	0	0	0	0	0	0	0	0	0	0	2	0	0	0	0	0	0	0	0	0	0	0	0	0	0	0	0	0	0	0	2
CA-31	633	Cardiobacterium_hominis	0	1	0	0	0	0	0	0	1	0	0	0	0	1	0	0	0	0	0	0	0	0	0	0	0	0	1	0	0	0	0	0	0	0	0	0	0	0	1	1	0	6
CA-32	540	Cardiobacterium_valvarum	2	0	0	0	0	0	0	0	0	0	0	0	0	0	0	0	0	0	0	0	0	2	0	0	0	2	0	0	0	0	0	0	0	0	0	0	0	0	0	0	0	6
CA-37	165	Catonella_morbi	0	0	1	0	0	0	1	0	1	0	4	0	1	0	0	0	0	0	0	0	0	0	0	0	0	0	1	0	0	0	0	0	2	1	0	0	2	0	0	1	2	17
CA-34	451	Catonella_sp_HOT_451	0	0	0	0	0	0	0	0	0	0	19	1	0	0	0	0	0	0	0	0	1	0	0	0	0	0	0	0	0	0	0	0	0	0	0	0	0	0	0	0	0	21
CA-35	2	Caulobacter_sp_HOT_002	0	0	0	0	0	0	0	0	0	0	0	0	0	0	0	0	0	0	0	0	0	0	0	0	0	0	0	0	0	0	0	0	0	0	0	0	0	0	0	0	0	0
CE-02	726	Centipeda_periodontii	1	5	9	11	13	11	2	4	0	8	0	2	0	12	0	0	0	0	0	0	0	0	0	0	0	0	0	0	1	0	0	0	0	0	0	0	0	0	0	0	0	79
CH-01	733	Chlamydophila_pneumoniae	0	0	0	0	0	0	0	0	0	0	0	0	0	0	0	0	0	0	0	0	0	0	0	0	0	0	0	0	0	0	0	0	0	0	0	0	0	0	0	0	0	0
CL-01	93	Clostridiales[F-1][G-1]_sp_HOT_093	0	0	0	0	0	0	0	0	0	0	53	0	0	0	0	0	0	0	0	0	0	0	0	0	0	0	0	0	0	0	0	0	0	0	0	0	0	0	0	0	0	53
CL-02	402	Clostridiales[F-1][G-2]_sp_HOT_402	0	0	0	0	0	0	0	0	0	0	0	0	0	0	0	0	0	0	0	0	0	0	0	0	0	0	0	0	0	0	0	0	0	0	0	0	0	0	0	0	0	0
CL-07	876	Clostridiales[F-3][G-1]_sp_HOT_876	0	0	0	0	0	0	0	0	0	0	0	0	0	0	0	0	0	0	0	0	0	0	0	0	0	0	0	0	0	0	0	0	0	0	0	0	0	0	0	0	0	0
CO-01	591	Corynebacterium_diphtheriae	0	0	0	0	0	0	0	0	0	0	0	0	0	0	0	0	0	0	0	0	0	0	0	0	0	0	0	0	0	0	0	0	0	0	0	0	0	0	0	0	0	0
CO-07	591	Corynebacterium_diphtheriae	0	0	0	0	0	0	0	0	0	0	0	0	0	0	0	0	0	0	0	0	0	0	0	0	0	0	0	0	0	0	0	0	0	0	0	0	0	0	0	0	0	0
CO-08	591	Corynebacterium_diphtheriae	0	0	0	0	0	0	0	0	0	0	0	0	0	0	0	0	0	0	0	0	0	0	0	0	0	0	0	0	0	0	0	0	0	0	0	0	0	0	0	0	0	0
CO-02	595	Corynebacterium_durum	2	0	0	0	0	0	0	0	0	0	5	0	0	1	0	12	0	8	0	23	23	1	0	1	0	0	0	0	0	1	0	2	0	1	0	0	0	1	0	0	1	82
CO-03	666	Corynebacterium_matruchotii	0	0	0	0	2	0	0	0	0	0	8	0	0	0	0	4	19	19	1	28	7	0	0	0	2	0	1	2	2	1	1	0	0	0	0	0	1	0	0	0	0	98
CO-04	835	Corynebacterium_mucifaciens	0	0	0	0	0	0	0	0	0	0	0	0	0	0	0	0	0	0	0	0	0	0	0	0	0	0	0	0	0	0	0	0	0	0	0	0	0	0	0	0	0	0
CO-05	184	Corynebacterium_tuscaniense	0	0	0	0	0	0	0	0	0	0	0	0	0	0	0	0	0	0	0	0	0	0	0	0	0	0	0	0	0	0	0	0	0	0	0	0	0	0	0	0	0	0
CO-06	853	Corynebacterium_urealyticum	0	0	0	0	0	0	0	0	0	0	0	0	0	0	0	0	0	0	0	0	0	0	0	0	0	0	0	0	0	0	0	0	0	0	0	0	0	0	0	0	0	0
CR-01	579	Cryptobacterium_curtum	0	0	0	0	0	0	0	1	4	2	0	0	0	0	0	0	1	2	0	0	0	0	0	0	0	0	0	0	0	0	0	0	0	0	0	0	0	0	0	0	0	10
AQ-01	660	Defluvibacter_lusatiensis	0	0	0	0	0	0	0	0	0	0	0	0	0	0	0	0	0	0	0	0	0	0	0	0	0	0	0	0	0	0	0	0	0	0	0	0	0	0	0	0	0	0
DE-01	23	Delftia_acidovorans	0	0	0	0	0	0	0	0	0	0	0	0	0	0	0	0	0	0	0	0	0	0	0	0	0	0	0	0	0	0	0	0	0	0	0	0	0	0	0	0	0	0
DE-02	41	Desulfobulbus_sp_HOT_041	0	0	0	0	0	0	0	0	0	0	1182	0	0	0	0	0	0	0	0	0	0	0	0	1	0	0	0	0	0	0	0	0	0	0	0	1	0	0	0	0	0	1184
DE-03	703	Desulfomicrobium_orale	0	0	0	0	0	0	0	0	0	0	234	0	0	0	0	0	0	0	0	0	0	0	0	0	0	0	0	0	0	0	0	0	0	0	0	0	0	0	0	0	0	234
DE-04	605	Desulfovibrio_fairfieldensis	0	0	0	0	0	0	0	0	0	0	0	0	0	0	0	0	0	0	0	0	0	0	0	0	0	0	0	0	0	0	0	0	0	0	0	0	0	0	0	0	0	0
DE-05	40	Desulfovibrio_sp_HOT_040	0	0	0	0	0	0	0	0	0	0	0	0	0	0	0	0	0	0	0	0	0	0	0	0	0	0	0	0	0	0	0	0	0	0	0	0	0	0	0	0	0	0
DI-01	118	Dialister_invisus	425	163	464	468	579	529	509	778	602	408	13	736	1840	1391	1367	1670	965	2648	1453	812	1000	1	3	0	4	4	16	14	9	15	26	1	4	50	126	85	100	65	19	31	38	19431
DI-02	843	Dialister_micraerophilus	0	0	0	0	0	0	0	0	0	0	0	0	0	0	0	0	0	0	0	0	0	0	0	0	0	0	0	0	0	0	0	0	0	0	0	0	0	0	0	0	0	0
DI-03	736	Dialister_pneumosintes	1237	765	2266	2006	977	196	443	533	608	794	0	796	925	189	29	262	848	1	0	0	1	1	0	2	2	0	1	0	0	0	0	0	0	0	1	1	1	0	1	0	0	12886
DI-04	119	Dialister_sp_HOT_119	0	0	0	0	0	0	0	0	0	0	0	0	0	0	0	0	0	0	0	0	0	0	0	0	0	0	0	0	0	0	0	0	0	0	0	0	0	0	0	0	0	0
DI-06	368	Dietzia_cinnamea	0	0	0	0	0	0	0	0	0	0	0	0	0	0	0	0	0	0	0	0	0	0	0	0	0	0	0	0	0	0	0	0	0	0	0	0	0	0	0	0	0	0
DO-01	813	Dolosigranulum_pigrum	0	0	0	0	0	0	0	0	0	0	0	0	0	0	0	0	0	0	0	0	0	0	0	0	0	0	0	0	0	0	0	0	0	0	0	0	0	0	0	0	0	0
EG-01	654	Eggerthella_lenta	0	0	0	0	0	0	0	0	0	0	0	0	0	0	0	0	0	0	0	0	0	0	0	0	0	0	0	0	0	0	0	0	0	0	0	0	0	0	0	0	0	0
EG-02	569	Eggerthia_catenaformis	0	1	1	0	1	3	1	0	0	0	0	0	0	0	0	0	0	0	0	0	0	0	0	0	0	0	0	0	0	0	0	0	0	0	0	0	0	0	0	0	1	8
EI-01	577	Eikenella_corrodens	4	0	0	0	0	0	0	0	0	0	130	0	0	0	1	0	0	0	0	0	0	0	0	0	0	0	0	0	0	0	0	4	14	1	0	0	0	0	0	0	0	154
EI-02	11	Eikenella_sp_HOT_011	0	0	0	0	0	0	0	0	0	0	0	0	0	0	0	0	0	0	0	0	0	0	0	0	0	0	0	0	0	0	0	0	0	0	0	0	0	0	0	0	0	0
EN-02	604	Enterococcus_faecalis	0	1	0	0	0	0	1	1	1	1	2	125	569	1093	114	403	6406	1320	1193	1770	1571	0	1	1	1	0	0	1	1	1	1	1	0	1	0	0	0	0	0	0	0	14580
ER-01	904	Erysipelothrichaceae[G-1]_sp_HOT_904	0	0	0	0	0	0	0	0	0	0	0	0	0	0	0	0	0	0	0	0	0	0	0	0	0	0	0	0	0	0	0	0	1	0	0	0	0	0	0	0	0	1
ER-02	905	Erysipelothrichaceae[G-1]_sp_HOT_905	0	0	0	0	0	0	0	0	0	0	4	0	0	0	0	0	0	0	0	0	0	0	0	1	0	0	0	0	0	0	0	0	0	0	0	0	0	0	0	0	0	5
ER-03	484	Erysipelothrix_tonsillarum	0	0	0	0	0	0	0	0	0	0	0	0	0	0	0	0	0	0	0	0	0	0	0	0	0	0	0	0	0	0	0	0	0	0	0	0	0	0	0	0	0	0
ER-04	747	Erythromicrobium_ramosum	0	0	0	0	0	0	0	0	0	0	0	0	0	0	0	0	0	0	0	0	0	0	0	0	0	0	0	0	0	0	0	0	0	0	0	0	0	0	0	0	0	0
EU-01	655	Eubacterium_limosum	0	0	0	0	0	0	0	0	0	0	0	0	0	0	0	0	0	0	0	0	0	0	0	0	0	0	0	0	0	0	0	0	0	0	0	0	0	0	0	0	0	0
EU-11	655	Eubacterium_limosum	0	0	0	0	0	0	0	0	0	0	0	0	0	0	0	0	0	0	0	0	0	0	0	0	0	0	0	0	0	0	0	0	0	0	0	0	0	0	0	0	0	0
FA-01	935	Fastidiosipila_sanguinis	0	0	0	0	0	0	0	0	0	0	0	0	0	0	0	0	0	0	0	0	0	0	0	0	0	0	0	0	0	0	0	0	0	0	0	0	0	0	0	0	0	0
FI-01	539	Filifactor_alocis	0	1	0	0	0	0	1	3	1	1	3213	1	1	1	2	1	0	0	0	0	0	0	0	0	1	0	1	1	3	1	0	1	0	0	5	1	0	0	0	0	1	3241
FI-02	662	Finegoldia_magna	0	0	0	0	0	0	0	0	0	0	0	1	0	0	0	0	0	0	0	0	1	0	0	0	0	0	0	0	0	0	0	0	0	0	0	0	0	0	1	0	0	3
FL-03	320	Flavitalea_sp_HOT_320	0	0	0	0	0	0	0	0	0	0	0	0	0	0	0	0	0	0	0	0	0	0	0	0	0	0	0	0	0	0	0	0	0	0	0	0	0	0	0	0	0	0
FR-01	363	Fretibacterium_fastidiosum	9	0	0	1	0	0	0	0	1	0	756	0	0	0	0	0	0	0	0	0	0	0	1	0	0	0	0	1	0	0	1	0	0	0	0	0	0	0	0	0	1	771
FR-07	358	Fretibacterium_sp_HOT_358	0	0	0	0	0	0	0	0	0	0	30	0	0	0	0	0	0	0	0	0	0	0	0	0	0	0	0	0	0	0	0	0	0	0	0	0	0	0	0	0	0	30
FR-04	360	Fretibacterium_sp_HOT_360	0	0	0	0	0	0	0	0	0	0	517	0	0	0	0	0	0	0	0	0	0	0	0	0	0	0	0	0	0	0	0	0	0	0	0	0	0	0	0	0	0	517
FR-05	361	Fretibacterium_sp_HOT_361	0	0	0	0	0	0	0	0	0	0	13	0	0	0	0	0	0	0	0	0	0	0	0	0	0	0	0	0	0	0	0	0	0	0	0	0	0	0	0	0	0	13
FU-01	860	Fusobacterium_gonidiaformans	0	0	0	0	0	0	0	0	0	0	0	0	0	0	0	0	0	0	0	0	0	0	0	0	0	0	0	0	0	0	0	0	0	0	0	0	0	1	0	0	0	1
FU-02	860	Fusobacterium_gonidiaformans	0	0	0	0	0	0	0	0	0	0	0	0	0	0	0	0	0	0	0	0	0	0	0	0	0	0	0	0	0	1	0	0	0	0	0	0	0	1	0	0	0	2
FU-04	690	Fusobacterium_necrophorum	0	0	0	0	0	0	0	0	0	0	0	0	0	0	0	0	0	0	0	0	0	0	0	0	0	0	0	0	0	0	0	0	0	0	0	0	0	0	0	0	0	0
FU-12	420	Fusobacterium_nucleatum_subsp_animalis	1130	16	59	67	105	186	4400	1320	75	25	109	5586	11032	13383	15357	12329	17430	19889	14444	11042	9419	287	10383	11570	9827	7095	7682	10067	15061	15147	14606	87	9741	12857	17250	17269	16484	11442	7807	8298	9716	350079
FU-07	698	Fusobacterium_nucleatum_subsp_nucleatum	11255	434	284	26	15	11	30	90	470	707	6243	4	14	17	22	10	10	7	13	6	9	0	28	18	21	5	9	18	28	18	20	0	22	22	34	31	23	23	8	8	19	20032
FU-10	201	Fusobacterium_periodonticum	18	10	3	18	10	32	44	23	53	21	28	6	31	26	36	25	11	23	29	12	12	5	36	73	51	31	23	45	54	57	69	0	28	22	22	40	60	51	39	37	21	1235
FU-13	204	Fusobacterium_sp_HOT_204	20	9	6	9	5	16	20	13	31	7	11	9	24	32	31	11	24	18	23	15	17	1	25	33	33	16	14	21	47	32	39	2	18	42	46	38	48	34	32	32	26	930
FU-11	205	Fusobacterium_sp_HOT_205	1	1	0	4	0	1	0	1	1	2	1	0	3	1	2	1	1	3	1	1	1	0	3	2	0	1	1	4	2	2	0	0	3	4	6	5	4	2	1	0	3	69
GA-01	829	Gardnerella_vaginalis	0	0	0	0	0	0	0	0	0	0	0	0	0	0	0	0	0	0	0	0	0	0	0	0	0	0	0	0	0	0	0	0	0	0	0	0	0	0	0	0	0	0
GE-06	555	Gemella_bergeri	0	0	0	0	0	0	0	0	0	0	0	0	0	0	0	0	0	0	0	0	0	0	0	0	0	0	0	0	0	0	0	0	0	0	0	0	0	0	0	0	0	0
GE-02	626	Gemella_haemolysans	3	7	1	1	4	1	0	0	0	0	219	3	6	0	0	0	0	0	0	0	0	4	3	2	3	0	4	0	1	1	0	0	2	1	0	0	0	0	2	0	0	268
GE-03	46	Gemella_morbillorum	0	0	0	1	0	0	0	0	0	1	116	0	0	0	0	0	0	0	1	0	0	0	0	1	1	0	1	0	0	0	0	0	2	0	0	0	0	0	0	0	0	124
GE-07	46	Gemella_morbillorum	3	0	0	0	0	0	0	0	0	0	86	0	0	0	0	0	0	0	0	0	0	0	0	0	0	0	0	1	0	2	0	0	0	1	0	2	0	0	0	0	0	95
GE-05	46	Gemella_morbillorum	6	0	0	0	0	0	0	0	0	0	2	0	1	0	0	0	0	0	0	0	0	0	0	0	0	0	0	0	0	0	0	0	1	0	0	0	0	0	1	0	0	11
GE-04	757	Gemella_sanguinis	0	0	0	1	0	2	1	0	0	0	33	0	1	0	1	0	0	0	0	0	0	0	1	7	0	0	0	0	0	1	1	0	2	0	1	0	0	0	0	0	0	52
GN-01	871	GN02[G-1]_sp_HOT_871	0	0	0	0	0	0	0	0	0	0	0	0	0	0	0	0	0	0	0	0	0	0	0	0	0	0	0	0	0	0	0	0	0	0	0	0	0	0	0	0	0	0
GN-02	872	GN02[G-1]_sp_HOT_872	0	0	0	0	0	0	0	0	0	0	0	0	0	0	0	0	0	0	0	0	0	0	0	0	0	0	0	0	0	0	0	0	0	0	0	0	0	0	0	0	0	0
GN-03	873	GN02[G-2]_sp_HOT_873	0	0	0	0	0	0	0	0	0	0	0	0	0	0	0	0	0	0	0	0	0	0	0	0	0	0	0	0	0	0	0	0	0	0	0	0	0	0	0	0	0	0
GR-01	534	Granulicatella_adiacens	154	4	7	3	8	8	1	4	3	1	18	185	3	14	1	2	76	114	22	78	8	1421	1167	1664	1078	540	747	552	449	397	851	2132	1876	461	1887	714	395	403	772	424	770	19414
GR-02	596	Granulicatella_elegans	0	0	0	0	0	0	0	0	0	1	105	0	0	0	0	0	0	0	0	0	0	0	0	0	0	0	1	0	0	0	0	0	0	1	0	0	0	1	0	0	1	110
HA-02	821	Haemophilus_ducreyi	0	0	0	0	0	0	0	0	0	0	0	0	0	0	0	0	0	0	0	0	0	0	0	0	0	0	0	0	0	0	0	0	0	0	0	0	0	0	0	0	0	0
HA-05	718	Haemophilus_parainfluenzae	137	1	3	6	6	1	3	1	9	0	3	2	0	0	1	0	0	0	0	1	0	9	9	1	1	1	2	2	0	7	5	6	15	3	5	0	3	4	7	3	0	257
HA-07	946	Haemophilus_pittmaniae	8	0	0	2	1	1	1	2	1	3	0	0	1	0	0	0	0	0	0	0	0	0	0	0	0	0	0	0	0	1	0	0	0	0	1	0	0	0	1	0	0	23
HE-01	812	Helicobacter_pylori	0	0	0	0	0	0	0	0	0	0	0	0	0	0	0	0	0	0	0	0	0	0	0	0	0	0	0	0	0	0	0	0	0	0	0	0	0	0	0	0	0	0
JO-01	635	Johnsonella_ignava	0	0	0	0	0	0	0	0	0	0	107	0	0	0	0	0	0	0	0	0	0	0	0	0	0	0	0	0	0	0	0	0	0	0	0	0	0	0	0	0	0	107
JO-02	166	Johnsonella_sp_HOT_166	0	0	0	0	0	0	0	0	0	0	51	0	0	0	0	0	0	0	0	0	0	0	0	0	0	0	0	0	0	0	0	0	0	0	0	0	0	0	0	0	0	51
JO-03	777	Jonquetella_anthropi	0	0	0	0	0	0	0	0	0	0	0	0	0	0	0	0	0	0	0	0	0	0	0	0	0	0	0	0	0	0	0	0	0	0	0	0	0	0	0	0	0	0
KI-02	646	Kingella_kingae	0	0	0	0	0	0	0	0	0	0	0	0	0	0	0	0	0	0	0	0	0	0	0	0	0	0	0	0	0	0	0	0	0	0	0	0	0	0	0	0	0	0
KI-03	706	Kingella_oralis	0	0	0	0	0	0	0	0	0	0	2	1	0	1	0	2	0	2	0	0	0	0	0	0	0	0	0	0	0	0	0	0	0	0	0	0	0	0	0	0	0	8
KI-05	12	Kingella_sp_HOT_012	0	0	0	0	0	0	0	0	0	0	0	0	0	0	0	0	0	0	0	0	0	0	0	0	0	0	0	0	0	0	0	0	0	0	0	0	0	0	0	0	0	0
KI-06	459	Kingella_sp_HOT_459	0	0	0	0	0	0	1	0	0	0	0	0	0	0	0	0	0	0	0	0	0	0	0	0	0	0	0	0	0	0	0	0	0	0	0	0	0	0	0	0	0	1
LA-01	82	Lachnoanaerobaculum_orale	3	3	1	0	3	0	1	0	1	0	1	617	239	274	980	305	7	1	30	1	15	3	0	0	2	1	0	1	0	0	5	0	0	1	2	0	2	0	0	1	2	2502
LA-02	494	Lachnoanaerobaculum_saburreum	50	12	12	10	7	25	49	21	36	8	0	1	14	44	103	33	3	86	57	10	24	675	667	319	337	198	126	124	637	459	512	114	1694	727	1413	234	712	512	730	958	472	12225
LA-03	83	Lachnoanaerobaculum_sp_HOT_083	0	0	0	0	0	0	0	0	0	0	0	1	0	0	0	0	0	0	0	0	0	0	0	0	0	0	0	0	0	0	0	0	0	0	0	0	0	0	0	0	0	1
LA-04	89	Lachnoanaerobaculum_sp_HOT_089	0	0	0	0	1	1	3	4	5	1	24	0	0	0	0	0	0	0	0	0	0	0	0	0	0	0	0	0	0	0	0	0	0	0	0	0	0	0	0	0	0	39
LA-05	496	Lachnoanaerobaculum_sp_HOT_496	0	0	0	0	0	0	0	0	0	0	0	0	0	0	0	0	0	0	0	0	0	0	0	0	0	0	0	0	0	0	0	0	0	0	0	0	0	0	0	0	0	0
LA-06	107	Lachnoanaerobaculum_umeaense	3	0	0	0	0	1	0	0	2	0	0	52	11	0	0	0	0	1	0	0	0	0	1	0	0	1	0	0	0	0	1	0	0	1	0	0	0	0	1	0	1	76
BU-02	94	Lachnospiraceae[G-10]_sp_HOT_094	0	0	0	0	0	0	0	0	0	0	0	0	0	0	0	0	0	0	0	0	0	0	0	0	0	0	0	0	0	0	0	0	0	0	0	0	0	0	0	0	0	0
LA-07	88	Lachnospiraceae[G-2]_sp_HOT_088	0	0	0	0	0	0	0	0	0	0	0	0	0	0	1	0	0	0	0	0	1	0	0	0	0	0	0	0	0	0	0	0	0	0	0	0	0	0	0	0	0	2
LA-30	88	Lachnospiraceae[G-2]_sp_HOT_088	0	0	0	0	0	0	0	0	0	0	0	0	0	0	0	0	0	0	0	0	0	0	0	0	0	0	0	0	0	0	0	0	0	0	0	0	0	0	0	0	0	0
LA-08	96	Lachnospiraceae[G-2]_sp_HOT_096	1	0	0	1	2	0	0	0	0	0	0	0	0	0	0	0	0	0	0	0	0	1	0	0	1	0	1	0	0	0	0	0	0	0	0	0	0	0	0	0	0	7
LA-09	100	Lachnospiraceae[G-3]_sp_HOT_100	11	0	0	0	0	0	0	0	0	0	0	0	0	0	0	0	0	1	0	0	0	1	0	1	0	0	0	0	0	0	0	0	0	0	0	0	0	0	0	0	0	14
LA-31	100	Lachnospiraceae[G-3]_sp_HOT_100	0	0	0	0	0	0	0	0	0	0	0	0	0	0	0	0	0	0	0	0	0	0	0	0	0	0	0	1	0	0	0	0	0	0	0	0	0	0	0	0	0	1
LA-32	100	Lachnospiraceae[G-3]_sp_HOT_100	0	0	0	0	0	0	0	0	0	0	0	0	0	0	0	0	0	0	0	0	0	0	0	0	0	0	0	0	0	0	0	0	0	0	0	0	0	0	0	0	0	0
LA-13	86	Lachnospiraceae[G-7]_sp_HOT_086	0	0	0	0	0	0	0	0	0	0	0	0	0	0	0	0	0	0	0	0	0	0	0	0	0	0	0	0	0	0	0	0	0	0	0	0	0	0	0	0	0	0
LA-14	163	Lachnospiraceae[G-7]_sp_HOT_163	0	0	0	0	0	0	0	0	0	0	0	0	0	0	0	0	0	0	0	0	0	0	0	0	0	0	0	0	0	0	0	0	0	0	0	0	0	0	0	0	0	0
LA-15	500	Lachnospiraceae[G-8]_sp_HOT_500	0	0	0	1	0	0	2	0	0	0	505	0	0	0	0	0	0	0	0	0	0	0	0	0	0	0	0	1	2	0	0	0	1	0	1	0	0	0	0	0	1	514
LA-33	924	Lachnospiraceae[G-9]_sp_HOT_924	0	0	0	0	0	0	0	0	0	0	0	0	0	0	0	0	0	0	0	0	0	0	0	0	0	0	0	0	0	0	0	0	0	0	0	0	0	0	0	0	0	0
LA-16	558	Lactobacillus_brevis	0	0	0	0	0	0	0	0	0	0	0	0	0	0	0	0	0	0	0	0	0	0	0	0	0	0	0	0	0	0	0	0	0	0	0	0	0	0	0	0	0	0
LA-17	816	Lactobacillus_coleohominis	0	0	0	0	0	0	1	0	0	0	0	0	0	0	1	0	0	0	0	0	0	0	0	0	0	0	0	0	0	0	0	0	0	0	0	0	0	0	0	0	1	3
LA-18	608	Lactobacillus_fermentum	0	0	0	0	0	0	0	0	0	0	0	0	0	0	0	0	0	0	0	0	0	0	0	0	0	0	0	0	0	0	0	0	0	0	0	0	0	0	0	0	0	0
LA-20	838	Lactobacillus_iners	0	0	0	0	0	0	0	0	0	0	0	0	0	0	0	0	0	0	0	0	0	0	0	0	0	0	0	0	0	0	0	0	0	0	0	0	0	0	0	0	0	0
LA-21	839	Lactobacillus_jensenii	0	0	0	0	0	0	0	0	0	0	0	0	0	0	0	0	0	0	0	0	0	0	0	0	0	0	0	0	0	0	0	0	0	0	0	0	0	0	0	0	0	0
LA-22	424	Lactobacillus_kisonensis	0	0	0	0	0	0	0	0	0	0	0	0	0	0	0	0	0	0	0	0	0	0	0	0	0	0	0	0	0	0	0	0	0	0	0	0	0	0	0	0	0	0
LA-34	709	Lactobacillus_oris	0	0	0	0	0	0	0	0	0	0	0	0	0	0	0	0	0	0	0	0	0	0	0	0	0	0	0	0	0	0	0	0	0	0	0	0	0	0	0	0	0	0
LA-23	418	Lactobacillus_parafarraginis	0	0	0	0	0	0	0	0	0	0	0	0	0	0	0	0	0	0	0	0	0	0	0	0	0	0	0	0	0	0	0	0	0	0	0	0	0	0	0	0	0	0
LA-24	818	Lactobacillus_reuteri_genosp_1	0	0	0	0	0	0	0	0	0	0	0	0	0	0	0	0	0	0	0	0	0	0	0	0	0	0	0	0	0	0	0	0	0	0	0	0	0	0	0	0	0	0
LA-25	756	Lactobacillus_salivarius	0	0	0	0	0	0	0	0	0	0	0	0	0	0	0	0	0	0	0	0	0	0	0	0	0	0	0	0	0	0	0	0	0	0	0	0	0	0	0	0	0	0
LA-26	52	Lactobacillus_sp_HOT_052	0	0	0	0	0	0	0	0	0	0	0	0	0	0	0	0	0	0	0	0	0	0	0	0	0	0	0	0	0	0	0	0	0	0	0	0	0	0	0	0	0	0
LA-27	51	Lactobacillus_vaginalis	0	0	0	0	0	0	0	0	0	0	0	0	0	0	0	0	0	0	0	0	0	0	0	0	0	0	0	0	0	0	0	0	0	0	0	0	0	0	0	0	0	0
LA-28	804	Lactococcus_lactis	0	0	0	0	0	0	0	0	0	0	0	0	0	0	0	0	0	0	0	0	0	0	0	0	0	0	0	0	0	0	0	0	0	0	0	0	0	0	0	0	0	0
LA-29	22	Lautropia_mirabilis	0	0	0	1	0	0	0	0	0	0	0	0	0	2	1	0	0	0	0	0	0	12	0	0	0	0	0	3	0	0	0	1	10	0	0	0	0	1	0	0	3	34
LE-04	845	Leptotrichia_goodfellowii	0	0	0	0	0	0	0	0	0	0	0	0	0	0	0	0	0	0	0	0	0	0	0	0	0	0	0	0	0	0	0	1	0	0	0	0	0	0	0	0	0	1
LE-06	213	Leptotrichia_hongkongensis	2	0	0	0	0	0	0	0	0	0	7	0	0	0	1	0	0	0	0	0	0	1	0	0	0	0	1	5	0	0	0	0	1	0	0	0	1	0	0	0	1	20
LE-07	214	Leptotrichia_shahii	0	0	0	0	0	0	1	0	0	0	1	0	0	0	1	0	2	0	1	0	0	0	0	0	0	0	0	0	0	0	0	0	0	1	2	0	1	0	0	0	0	10
LE-08	212	Leptotrichia_sp_HOT_212	0	0	2	2	0	0	0	2	0	0	14	0	0	0	0	0	0	0	0	0	0	0	0	0	0	0	0	0	0	0	0	0	0	0	1	0	0	0	0	0	0	21
LE-26	215	Leptotrichia_sp_HOT_215	0	0	2	0	0	1	2	0	1	0	6	8	0	0	0	0	1	0	0	0	0	0	0	0	0	0	0	0	0	0	0	0	0	0	0	0	0	0	0	2	0	23
LE-10	217	Leptotrichia_sp_HOT_217	0	0	0	0	0	0	0	0	0	0	0	0	0	0	0	0	0	0	0	0	0	0	0	0	0	0	0	0	0	0	0	0	0	0	0	0	0	0	0	0	0	0
LE-11	218	Leptotrichia_sp_HOT_218	0	0	0	0	0	0	1	0	0	0	0	0	0	0	4	0	0	0	0	0	0	0	0	2	0	0	0	0	0	0	0	0	0	0	0	0	0	0	0	0	0	7
LE-12	219	Leptotrichia_sp_HOT_219	0	0	0	0	1	0	0	0	0	0	0	0	0	0	0	0	0	0	0	0	0	0	0	0	0	0	0	0	0	0	0	0	0	0	0	0	0	0	0	0	0	1
LE-13	221	Leptotrichia_sp_HOT_221	0	1	2	0	0	0	0	0	0	0	1	1	1	6	1	0	0	1	0	0	0	1	7	0	1	0	1	2	2	0	2	3	0	0	8	2	1	0	0	1	0	45
LE-25	223	Leptotrichia_sp_HOT_223	0	0	0	0	0	0	0	0	0	0	0	0	0	0	0	0	0	0	0	0	0	0	0	0	0	0	0	0	0	0	0	0	0	0	0	0	0	0	0	0	0	0
LE-15	392	Leptotrichia_sp_HOT_392	0	0	0	0	0	0	0	0	0	0	1	0	0	0	0	0	0	0	0	0	0	0	0	0	0	0	0	0	0	0	0	0	0	0	0	0	0	0	0	0	0	1
LE-16	417	Leptotrichia_sp_HOT_417	1	0	2	3	2	0	0	1	0	3	3	1	0	0	2	0	0	0	0	1	2	18	2	9	1	3	0	0	13	1	0	0	0	0	4	2	0	0	1	3	2	80
LE-18	463	Leptotrichia_sp_HOT_463	0	0	0	0	0	0	0	0	0	0	0	0	0	0	0	0	0	0	0	0	0	0	0	0	0	0	0	0	0	0	0	0	0	0	0	0	2	0	0	0	0	2
LE-19	498	Leptotrichia_sp_HOT_498	0	0	0	0	0	0	0	0	0	0	0	0	1	0	0	0	0	0	0	0	0	0	2	0	0	0	0	1	0	0	2	0	0	0	0	0	1	0	0	0	0	7
LE-20	847	Leptotrichia_sp_HOT_847	0	0	0	0	0	0	0	0	0	0	0	0	0	0	0	0	0	0	0	0	0	0	0	0	0	0	0	0	0	0	0	0	0	0	0	0	0	0	0	0	0	0
LE-21	879	Leptotrichia_sp_HOT_879	0	0	0	0	0	0	0	0	0	0	0	0	0	0	0	0	0	0	0	0	0	0	0	0	0	0	0	0	0	0	0	0	0	0	0	0	0	0	0	0	0	0
LE-22	222	Leptotrichia_wadei	0	0	0	0	1	0	0	0	1	0	5	0	2	0	0	0	0	0	0	0	0	0	0	0	0	0	0	0	0	3	0	0	0	0	0	0	7	0	0	2	3	24
AN-03	122	Megasphaera_micronuciformis	171	20	15	12	46	0	1	0	0	0	1	714	698	1717	172	99	0	449	26	272	197	1	0	1	1	0	0	0	2	0	1	1	0	1	0	2	0	0	0	0	1	4621
ME-01	123	Megasphaera_sp_HOT_123	0	0	0	0	0	0	0	0	0	0	0	0	0	0	0	0	0	0	0	0	0	0	0	0	0	0	0	0	0	0	0	0	0	0	0	0	0	0	0	0	0	0
ME-02	123	Megasphaera_sp_HOT_123	0	0	0	0	0	0	0	0	0	0	0	0	0	0	0	0	0	0	0	0	0	0	0	0	0	0	0	0	0	0	0	0	0	0	0	0	0	0	0	0	0	0
ME-04	841	Megasphaera_sp_HOT_841	0	0	0	0	0	0	0	0	0	0	0	0	0	0	0	0	0	0	0	0	0	0	0	0	0	0	0	0	0	0	0	0	0	0	0	0	0	0	0	0	0	0
MI-01	185	Microbacterium_ginsengisoli	0	0	0	0	0	0	0	0	0	0	0	0	0	0	0	0	0	0	0	0	0	0	0	0	0	0	0	0	0	0	0	0	0	0	0	0	0	0	0	0	0	0
MI-02	684	Mitsuokella_multacida	0	0	0	0	0	0	0	0	0	0	0	0	0	0	0	0	0	0	0	0	0	0	0	0	0	0	0	0	0	0	0	0	0	0	0	0	0	0	0	0	0	0
MI-03	131	Mitsuokella_sp_HOT_131	0	0	0	0	0	0	0	0	0	0	0	0	0	0	0	0	0	0	0	0	0	0	0	0	0	0	0	0	0	0	0	0	0	0	0	0	0	0	0	0	0	0
MI-04	521	Mitsuokella_sp_HOT_521	0	0	0	0	0	0	0	0	0	0	0	0	0	0	0	0	0	0	0	0	0	0	0	0	0	0	0	0	0	0	0	0	0	0	0	0	0	0	0	0	0	0
MI-05	521	Mitsuokella_sp_HOT_521	0	0	0	0	0	0	0	0	0	0	0	0	0	0	0	0	0	0	0	0	0	0	0	0	0	0	0	0	0	0	0	0	0	0	0	0	0	0	0	0	1	1
MI-06	521	Mitsuokella_sp_HOT_521	0	0	0	0	0	0	0	0	0	0	0	0	0	0	0	0	0	0	0	0	0	0	0	0	0	0	0	0	0	0	0	0	0	0	0	0	0	0	0	0	0	0
MO-01	830	Mobiluncus_mulieris	0	0	0	0	0	0	0	0	0	0	0	0	0	0	0	0	0	0	0	0	0	0	0	0	0	0	0	0	0	0	0	0	0	0	0	0	0	0	0	0	0	0
MO-03	742	Mogibacterium_pumilum	0	0	0	0	0	0	0	0	0	0	0	0	0	0	0	0	0	0	0	0	0	0	0	0	0	0	0	0	0	0	0	0	0	0	0	0	0	0	0	0	0	0
MO-04	42	Mogibacterium_timidum	0	1	23	1	2	0	0	0	1	0	1031	0	0	0	1	0	0	1	0	0	0	0	1	0	0	2	0	1	0	0	0	0	0	0	0	2	0	1	0	1	0	1069
MO-05	504	Mollicutes[G-1]_sp_HOT_504	0	0	0	0	0	0	0	0	0	0	106	0	0	0	0	0	0	0	0	0	0	0	0	0	0	0	0	0	0	0	0	0	0	0	0	0	0	0	0	0	0	106
MO-06	906	Mollicutes[G-2]_sp_HOT_906	0	0	0	0	0	0	0	0	0	0	3	0	0	0	0	0	0	0	0	0	0	0	0	0	0	0	0	0	0	0	0	0	0	0	0	0	0	0	0	0	0	3
MY-01	823	Mycobacterium_leprae	0	0	0	0	0	0	0	0	0	0	0	0	0	0	0	0	0	0	0	0	0	0	0	0	0	0	0	0	0	0	0	0	0	0	0	0	0	0	0	0	0	0
MY-02	561	Mycoplasma_buccale	0	0	0	0	0	0	0	0	0	0	0	0	0	0	0	0	0	0	0	0	0	0	0	0	0	0	0	0	0	0	0	0	0	0	0	0	0	0	0	0	0	0
MY-03	606	Mycoplasma_faucium	0	1	0	0	0	0	0	0	0	0	49	0	0	2	0	0	0	0	0	0	0	0	0	0	0	0	0	0	0	0	0	0	2	0	0	0	0	0	0	0	1	55
MY-04	607	Mycoplasma_fermentans	0	0	0	0	0	0	0	0	0	0	0	0	0	0	0	0	0	0	0	0	0	0	0	0	0	0	0	0	0	0	0	0	0	0	0	0	0	0	0	0	0	0
MY-05	616	Mycoplasma_genitalium	0	0	0	0	0	0	0	0	0	0	0	0	0	0	0	0	0	0	0	0	0	0	0	0	0	0	0	0	0	0	0	0	0	0	0	0	0	0	0	0	0	0
MY-06	632	Mycoplasma_hominis	0	0	0	0	0	0	0	0	0	0	0	0	0	0	0	0	0	0	0	0	0	0	0	0	0	0	0	0	0	0	0	0	0	0	0	0	0	0	0	0	0	0
MY-07	656	Mycoplasma_lipophilum	0	0	0	0	0	0	0	0	0	0	0	0	0	0	0	0	0	0	0	0	0	0	0	0	0	0	0	0	0	0	0	0	0	0	0	0	0	0	0	0	0	0
MY-08	704	Mycoplasma_orale	0	0	0	0	0	0	0	0	0	0	0	0	0	0	0	0	0	0	0	0	0	0	0	0	0	0	0	0	0	0	0	0	0	0	0	0	0	0	0	0	0	0
MY-09	732	Mycoplasma_pneumoniae	0	0	0	0	0	0	0	0	0	0	0	0	0	0	0	0	0	0	0	0	0	0	0	0	0	0	0	0	0	0	0	0	0	0	0	0	0	0	0	0	0	0
MY-10	754	Mycoplasma_salivarium	1	0	0	0	0	0	0	0	0	0	20	0	0	0	0	0	0	0	0	0	0	0	0	0	0	0	0	0	1	0	0	0	0	0	0	0	0	0	0	0	0	22
NE-01	13	Neisseria_bacilliformis	0	0	0	0	0	0	0	0	0	0	0	0	0	0	0	0	0	0	0	0	0	0	0	0	0	0	0	0	0	0	0	0	1	0	0	0	0	0	0	0	0	1
NE-02	598	Neisseria_elongata	1	0	0	0	0	0	0	0	0	0	2	0	0	2	0	0	0	0	0	0	0	0	0	0	0	0	0	0	0	0	1	0	0	0	0	0	0	0	2	0	0	8
NE-03	610	Neisseria_flavescens	2	0	2	0	0	0	0	0	0	0	0	0	2	0	2	0	0	0	0	1	0	0	0	0	7	0	1	7	0	20	0	0	6	0	0	3	2	0	0	0	1	56
NE-16	610	Neisseria_flavescens	0	0	0	0	0	0	0	0	0	0	0	0	0	0	0	0	0	0	0	0	0	0	0	0	0	0	0	0	0	0	0	0	0	0	0	0	0	0	1	0	0	1
NE-04	621	Neisseria_gonorrhoeae	0	0	0	0	0	0	0	0	0	0	0	0	0	0	0	0	0	0	0	0	0	0	0	0	0	0	0	0	0	0	0	0	0	0	0	0	0	0	0	0	0	0
NE-05	649	Neisseria_lactamica	0	0	0	0	0	0	0	0	0	0	0	0	0	0	0	0	0	0	0	0	0	0	0	0	0	0	0	0	0	0	0	0	0	0	0	0	0	0	0	0	0	0
NE-06	669	Neisseria_meningitidis	0	0	0	0	0	0	1	0	0	0	0	0	0	0	0	0	0	0	0	0	0	0	0	0	0	0	0	0	0	0	0	0	0	0	0	0	0	0	0	0	0	1
NE-18	14	Neisseria_oralis	0	5	0	0	1	0	0	0	0	0	0	0	1	0	0	0	0	0	0	1	0	0	0	0	0	0	0	1	0	0	0	0	5	0	0	1	0	0	0	0	6	21
NE-08	729	Neisseria_pharyngis	0	0	0	0	0	0	0	0	1	0	0	0	0	0	0	0	0	0	0	0	0	0	1	0	0	0	1	0	2	0	0	0	0	0	1	0	0	1	3	1	0	11
NE-15	729	Neisseria_pharyngis	0	0	0	0	0	0	0	0	0	0	0	0	0	0	0	0	0	0	0	0	0	0	0	0	0	0	0	0	0	0	0	0	0	0	0	0	0	0	0	0	0	0
NE-10	18	Neisseria_sp_HOT_018	0	0	0	0	0	0	0	0	0	0	0	0	0	0	0	0	0	0	0	0	0	0	0	0	0	0	0	0	0	0	0	0	0	0	0	0	0	0	0	0	0	0
NE-11	20	Neisseria_sp_HOT_020	0	0	0	0	0	0	0	0	0	0	0	0	0	0	0	0	0	0	0	0	0	0	0	0	0	0	0	0	0	0	0	0	0	0	0	0	0	0	0	0	0	0
NE-12	499	Neisseria_sp_HOT_499	0	0	0	0	0	0	0	0	0	0	0	0	0	0	0	0	0	0	0	0	0	0	0	0	0	0	0	0	0	0	0	0	0	0	0	0	0	0	0	0	0	0
NE-13	523	Neisseria_sp_HOT_523	0	0	0	0	0	0	0	0	0	0	0	0	0	0	0	0	0	0	0	0	0	0	0	0	0	0	0	0	0	0	0	0	0	0	0	0	0	0	0	0	0	0
NE-19	476	Neisseria_subflava	0	0	0	0	0	0	0	0	0	0	0	0	0	0	0	0	0	0	0	0	0	0	0	0	0	0	0	0	0	0	0	0	0	0	0	0	0	0	0	0	0	0
NE-14	92	Neisseria_weaveri	0	0	0	0	0	0	0	0	0	0	0	0	0	0	0	0	0	0	0	0	0	0	0	0	0	0	0	0	0	0	0	0	0	0	0	0	0	0	0	0	0	0
OL-01	806	Olsenella_profusa	0	0	0	0	0	0	0	0	0	0	0	0	0	0	0	0	0	0	0	0	0	0	0	0	0	0	0	0	0	0	0	0	0	0	0	0	0	0	0	0	0	0
OL-02	807	Olsenella_sp_HOT_807	0	0	0	0	0	0	0	0	0	0	0	0	0	0	0	0	0	1	0	0	0	0	0	0	0	0	1	0	0	0	0	0	0	0	0	0	0	0	0	0	0	2
OL-03	809	Olsenella_sp_HOT_809	0	0	0	0	0	0	0	1	0	0	0	0	0	0	0	0	0	0	0	0	0	0	0	0	1	1	2	0	3	3	2	0	1	1	3	3	4	1	3	4	1	34
OL-05	939	Olsenella_sp_HOT_939	0	0	0	0	0	0	0	0	0	0	0	0	0	0	0	0	0	0	0	0	0	0	0	0	0	0	0	0	0	0	0	0	0	0	0	0	0	0	0	0	0	0
OL-04	38	Olsenella_uli	7	2	2	2	4	10	48	4	1	0	0	0	0	0	0	0	0	0	0	0	0	0	0	0	0	0	0	0	0	0	0	0	0	0	0	0	0	0	0	0	0	80
OR-06	108	Oribacterium_asaccharolyticum	0	0	1	0	3	0	0	0	0	0	0	2	14	3	7	1	0	0	0	0	0	2	0	1	0	0	0	0	0	0	0	0	1	0	0	0	2	0	0	0	1	38
OR-07	934	Oribacterium_parvum	0	0	3	0	0	0	0	0	1	0	0	0	0	0	0	0	0	0	0	0	0	0	0	0	1	0	0	0	0	0	0	0	0	0	0	0	0	0	0	0	0	5
OR-01	457	Oribacterium_sinus	0	90	358	120	62	81	0	2	0	0	2	81	29	18	3	0	0	0	2	1	0	1	409	657	381	668	256	2044	1795	1165	2117	1	2	0	5	139	542	1989	1015	1315	2846	18196
OR-08	78	Oribacterium_sp_HOT_078	6	132	238	393	101	96	2193	1021	1144	1344	0	332	4135	2483	1712	2695	1817	1845	3691	1735	3729	3	1033	2103	2504	1503	1809	1894	6369	5048	2654	26	4139	3278	5399	2476	5997	1940	3411	2860	1223	86511
OR-03	102	Oribacterium_sp_HOT_102	3479	9015	9643	2590	6966	5491	4150	2677	5392	1713	0	1	3	3	0	2	1	1	5	0	2	2	3	2	1	1	0	1	7	1	1	1	0	0	2	2	1	5	2	1	2	51169
OT-01	894	Ottowia_sp_HOT_894	0	0	0	0	0	0	0	0	0	0	0	0	0	0	0	0	0	0	0	0	0	0	0	0	0	0	0	0	0	0	0	0	0	0	0	0	0	0	0	0	0	0
OT-02	894	Ottowia_sp_HOT_894	0	0	0	0	0	0	0	0	0	0	0	0	0	0	0	0	0	0	4	0	0	0	0	0	0	0	0	2	0	0	0	0	0	0	0	0	0	0	0	0	0	6
PA-01	786	Paenibacillus_phoenicis	0	0	0	0	0	0	0	0	0	0	0	0	0	0	0	0	0	0	0	0	0	0	0	0	0	0	0	0	0	0	0	0	0	0	0	0	0	0	0	0	0	0
PA-02	586	Parascardovia_denticolens	0	0	0	0	0	0	0	0	0	0	0	0	0	0	0	0	0	0	0	0	0	0	0	0	0	0	0	0	0	0	0	0	0	0	0	0	0	0	0	0	0	0
PA-03	111	Parvimonas_micra	4	2	2	4	2	5	0	1	0	1	2859	185	61	10	10	20	262	22	107	7	1	3	1	5	4	2	3	1	1	0	5	4	5	3	3	1	2	2	0	4	0	3614
PA-04	110	Parvimonas_sp_HOT_110	1	1	0	0	1	1	0	0	1	0	0	0	0	1	1	0	3	0	59	149	5	0	0	2	288	1126	378	1075	1022	434	314	2	266	325	1936	2931	1245	2271	1274	1967	1427	18506
PE-25	933	Pedobacter_sp__HOT_933	0	0	0	0	0	0	0	0	0	0	0	0	0	0	0	0	0	0	0	0	0	0	0	0	0	0	0	0	0	0	0	0	0	0	0	0	0	0	0	0	0	0
FL-01	318	Pedobacter_sp_HOT_318	0	0	0	0	0	0	0	0	0	0	0	0	0	0	0	0	0	0	0	0	0	0	0	0	0	0	0	0	0	0	0	0	0	0	0	0	0	0	0	0	0	0
FL-02	321	Pedobacter_sp_HOT_321	0	0	0	0	0	0	0	0	0	0	0	0	0	0	0	0	0	0	0	0	0	0	0	0	0	0	0	0	0	0	0	0	0	0	0	0	0	0	0	0	0	0
PE-19	790	Peptinophilaceae[G-2]_sp_HOT_790	0	0	0	0	0	0	0	0	0	0	0	0	0	0	0	0	0	0	0	0	0	0	0	0	0	0	0	0	0	0	0	0	0	0	0	0	0	0	0	0	0	0
PE-01	167	Peptococcus_sp_HOT_167	0	0	0	0	0	0	0	0	0	0	98	0	0	0	0	0	0	0	0	0	0	0	0	0	0	0	0	0	0	0	0	0	0	0	0	0	0	0	0	0	0	98
PE-22	167	Peptococcus_sp_HOT_167	0	0	0	0	0	0	1	0	0	0	444	0	0	0	0	0	0	0	0	0	0	0	0	0	0	0	2	0	0	1	0	0	0	0	0	0	0	0	0	0	0	448
PE-02	168	Peptococcus_sp_HOT_168	0	0	0	0	0	0	0	0	0	0	0	0	0	0	0	0	0	0	0	0	0	0	0	0	0	0	0	0	0	0	0	0	0	0	0	0	0	0	0	0	0	0
PE-18	113	Peptoniphilaceae[G-1]_sp_HOT_113	1	0	1	0	0	0	0	1	2	0	1213	0	0	0	0	0	0	0	0	0	1	0	0	0	0	0	0	0	0	0	0	0	0	0	0	0	0	2	0	0	0	1221
PE-26	929	Peptoniphilaceae[G-3]_sp__HOT_929	0	0	0	0	0	0	0	0	0	0	0	0	0	0	0	0	0	0	0	0	0	0	0	0	0	0	0	0	0	0	0	0	0	0	0	0	0	0	0	0	0	0
PE-03	548	Peptoniphilus_asaccharolyticus	0	0	0	0	0	0	0	0	0	0	0	0	0	0	0	0	0	0	0	0	0	0	0	0	0	0	0	0	0	0	0	0	0	0	0	0	0	0	0	0	0	0
PE-04	840	Peptoniphilus_indolicus	0	0	0	0	0	0	0	0	0	0	0	0	0	0	0	0	0	0	0	0	0	0	0	0	0	0	0	0	0	0	0	0	0	0	0	0	0	0	0	0	0	0
PE-08	836	Peptoniphilus_lacrimalis	0	0	0	0	0	0	0	0	0	0	0	0	0	0	0	0	0	0	0	0	0	0	0	0	0	0	0	0	0	0	0	0	0	0	0	0	0	0	0	0	0	0
PE-06	375	Peptoniphilus_sp_HOT_375	0	0	0	0	0	0	0	0	0	0	0	0	0	0	0	0	0	0	0	0	0	0	0	0	0	0	0	0	0	0	0	0	0	0	0	0	0	0	0	0	0	0
PE-07	386	Peptoniphilus_sp_HOT_386	0	0	0	0	0	0	0	0	0	0	0	0	0	0	0	0	0	0	0	0	0	0	0	0	0	0	0	0	0	0	0	0	0	0	0	0	0	0	0	0	0	0
EU-02	105	Peptostreptococcaceae[XI][G-1][Eubacterium]_infirmum	1	0	0	0	0	0	1	1	1	0	1	0	0	0	0	0	0	1	0	0	0	0	2	2	0	1	0	0	1	0	0	1	0	0	1	0	1	0	0	0	1	16
EU-03	467	Peptostreptococcaceae[XI][G-1][Eubacterium]_sulci	0	0	0	0	0	1	3	1	0	0	0	0	0	0	1	0	0	0	0	0	0	0	0	2	0	0	2	0	0	0	0	0	0	0	0	0	0	0	0	0	0	10
PE-09	383	Peptostreptococcaceae[XI][G-1]_sp_HOT_383	1	0	0	0	0	0	1	0	0	0	0	0	1	0	0	0	0	1	0	0	0	0	0	0	0	0	1	0	1	0	0	0	0	1	1	2	1	1	0	0	0	12
PE-10	91	Peptostreptococcaceae[XI][G-2]_sp_HOT_091	0	0	0	0	0	0	0	0	0	0	0	0	0	0	0	0	0	0	0	0	0	0	0	0	0	0	0	0	0	0	0	0	0	0	0	0	0	0	0	0	0	0
PE-23	91	Peptostreptococcaceae[XI][G-2]_sp_HOT_091	0	0	0	0	0	0	0	0	0	0	102	0	0	0	0	0	0	0	0	0	0	0	0	0	0	0	0	0	0	0	0	0	0	0	0	0	0	0	0	0	0	102
PE-24	91	Peptostreptococcaceae[XI][G-2]_sp_HOT_091	0	0	0	0	0	0	0	0	0	0	1	0	0	0	0	0	0	0	0	0	0	0	0	0	0	0	1	0	0	0	0	0	0	0	0	0	0	0	0	0	0	2
PE-12	495	Peptostreptococcaceae[XI][G-3]_sp_HOT_495	0	2	44	23	35	17	98	34	58	22	365	0	0	0	0	0	0	0	0	0	0	0	1	1	0	0	0	0	0	0	0	0	0	0	0	0	0	0	0	0	0	700
PE-27	950	Peptostreptococcaceae[XI][G-3]_sp_HOT_950	0	0	0	0	0	0	0	0	0	0	0	0	0	0	0	0	0	0	0	0	0	0	0	0	0	0	0	0	0	0	0	0	0	0	0	0	0	0	0	0	0	0
PE-13	103	Peptostreptococcaceae[XI][G-4]_sp_HOT_103	0	0	0	0	0	0	0	0	0	0	0	0	0	0	0	0	0	0	0	0	0	0	0	0	0	0	0	0	0	0	0	0	0	0	0	0	0	0	0	0	0	0
PE-14	369	Peptostreptococcaceae[XI][G-4]_sp_HOT_369	0	0	0	0	0	0	0	3	0	1	867	0	0	0	0	1	0	0	0	0	0	0	0	0	1	1	0	0	1	0	0	0	1	2	0	0	0	1	0	1	0	880
EU-05	759	Peptostreptococcaceae[XI][G-5][Eubacterium]_saphenum	0	0	0	1	0	2	0	1	1	0	3697	0	0	0	1	0	1	0	0	0	0	0	0	0	0	0	0	0	0	0	0	0	2	0	0	0	0	0	0	0	0	3706
PE-15	493	Peptostreptococcaceae[XI][G-5]_sp_HOT_493	0	0	0	0	0	0	0	0	0	0	0	0	0	0	0	0	0	0	0	0	0	0	0	0	0	0	0	0	0	0	0	0	0	0	0	0	0	0	0	0	0	0
EU-06	673	Peptostreptococcaceae[XI][G-6][Eubacterium]_minutum	0	0	0	0	1	2	1	0	0	0	147	0	0	0	0	2	1	1	0	0	0	0	2	1	0	0	1	0	2	0	0	0	0	0	0	0	0	0	0	0	3	164
EU-07	694	Peptostreptococcaceae[XI][G-6][Eubacterium]_nodatum	16	47	38	1	4	4	2	1	2	0	820	0	0	0	0	0	0	0	0	0	1	0	0	2	0	0	0	0	0	0	0	2	0	0	0	0	0	0	1	0	0	941
EU-09	694	Peptostreptococcaceae[XI][G-6][Eubacterium]_nodatum	0	0	0	0	0	0	0	0	0	0	0	0	0	0	0	0	0	0	0	0	0	0	0	0	0	0	0	0	0	0	0	0	0	0	0	0	0	0	0	0	0	0
PE-17	106	Peptostreptococcaceae[XI][G-7][Eubacterium]_yurii_subsp_schtitka	0	0	0	0	0	0	0	0	0	0	1076	0	0	0	0	0	0	0	0	0	0	1	0	1	0	0	0	0	0	0	0	0	0	0	0	0	0	0	0	0	0	1078
EU-08	377	Peptostreptococcaceae[XI][G-7][Eubacterium]_yurii_subsp_yurii_&_margaretiae	0	0	0	0	0	0	0	0	0	0	1	0	0	0	0	0	0	0	0	0	0	0	0	0	0	0	0	0	0	0	0	0	0	0	0	0	0	0	0	0	0	1
PE-16	81	Peptostreptococcaceae[XI][G-7]_sp_HOT_081	13	0	0	0	0	0	0	0	0	0	86	0	0	0	0	0	0	0	0	0	0	0	0	0	0	0	1	0	0	0	0	0	0	0	0	0	0	0	0	0	1	101
PE-28	922	Peptostreptococcaceae[XI][G-7]_sp_HOT_922	0	0	0	0	0	0	0	0	0	0	0	0	0	0	0	0	0	0	0	0	0	0	0	0	0	0	0	0	0	0	0	0	0	0	0	0	0	0	0	0	0	0
PE-11	382	Peptostreptococcaceae[XI][G-8]_sp_HOT_382	0	0	0	0	0	0	0	0	0	0	0	0	0	0	0	0	0	0	0	0	0	0	0	0	0	0	0	0	0	0	0	0	0	0	0	0	0	0	0	0	0	0
EU-04	557	Peptostreptococcaceae[XI][G-9][Eubacterium]_brachy	1	0	1	1	1	0	1	0	0	0	1182	1	0	1	0	0	0	0	0	0	0	0	0	0	0	0	1	1	1	1	0	0	1	0	0	0	1	1	0	1	1	1198
PE-20	542	Peptostreptococcus_anaerobius	0	0	0	0	0	0	0	0	0	0	0	0	0	0	0	0	0	0	0	0	0	0	0	0	0	0	0	0	0	0	0	0	0	0	0	0	0	0	0	0	0	0
PE-21	112	Peptostreptococcus_stomatis	688	76	283	229	182	312	490	108	204	72	0	534	1485	210	96	502	1	0	0	0	2	0	0	3	2	1	0	0	0	0	0	0	2	0	0	1	0	2	3	0	1	5489
PO-01	547	Porphyromonas_asaccharolytica	0	0	0	0	0	0	0	0	0	0	0	0	0	0	0	0	0	0	0	0	0	0	0	0	0	0	0	0	0	0	0	0	0	0	0	0	0	0	0	0	0	0
PO-02	283	Porphyromonas_catoniae	0	0	0	0	0	0	0	0	0	0	0	0	0	0	0	0	0	0	0	0	0	0	0	0	0	0	0	0	0	0	0	0	0	0	0	0	0	0	0	0	0	0
PO-14	283	Porphyromonas_catoniae	0	0	0	0	0	0	0	0	0	0	0	0	0	0	0	0	0	0	0	0	0	0	0	0	0	0	0	0	0	0	0	0	0	0	0	0	0	0	0	0	0	0
PO-15	283	Porphyromonas_catoniae	0	0	0	0	0	0	0	0	0	0	0	0	0	0	0	0	0	0	0	0	0	0	0	0	0	0	0	0	0	0	0	0	0	0	0	0	0	0	0	0	0	0
PO-16	283	Porphyromonas_catoniae	0	0	0	0	0	0	0	0	0	0	0	0	0	0	0	0	0	0	0	0	0	0	0	0	0	0	0	0	0	0	0	0	0	0	0	0	0	0	0	0	0	0
PO-17	283	Porphyromonas_catoniae	2	0	0	0	0	0	0	0	0	0	0	0	0	0	0	0	0	0	0	0	0	0	0	0	0	0	0	0	0	0	0	0	0	0	0	0	0	0	0	0	0	2
PO-18	283	Porphyromonas_catoniae	0	0	0	0	0	0	0	0	0	0	0	0	0	0	0	0	0	0	0	0	0	0	0	0	0	0	0	0	0	0	0	0	0	0	0	0	0	0	0	0	0	0
PO-03	273	Porphyromonas_endodontalis	0	0	0	0	0	0	0	0	0	0	12	0	1	2	0	0	0	0	0	0	0	0	0	2	0	0	0	3	0	0	0	0	0	0	0	0	0	0	0	1	3	24
PO-05	619	Porphyromonas_gingivalis	1	0	0	0	0	2	0	0	0	1	455	0	0	0	0	0	0	0	0	0	0	2	0	0	0	1	3	0	1	0	0	0	1	0	0	1	0	0	0	0	1	469
PO-06	275	Porphyromonas_sp_HOT_275	1	0	0	0	0	0	0	0	0	0	0	0	0	0	0	0	0	0	0	0	0	0	0	0	0	0	0	0	0	0	0	0	0	0	0	0	0	0	0	0	0	1
PO-19	275	Porphyromonas_sp_HOT_275	53	1	0	0	0	0	0	0	0	0	3	0	0	0	0	0	0	0	0	0	0	0	0	0	0	0	0	0	0	0	0	0	0	1	0	0	0	0	1	0	0	59
PO-20	275	Porphyromonas_sp_HOT_275	0	0	0	0	0	0	0	0	0	0	0	0	0	0	0	0	0	0	0	0	0	0	0	0	0	0	0	0	0	0	0	0	0	0	0	0	0	0	0	0	0	0
PO-21	277	Porphyromonas_sp_HOT_277	0	0	0	0	0	0	0	0	0	0	0	0	0	0	0	0	0	0	0	0	0	0	0	0	0	0	0	0	0	0	0	0	0	0	0	0	0	0	0	0	0	0
PO-22	277	Porphyromonas_sp_HOT_277	2	0	0	0	0	0	0	0	0	0	0	0	0	0	0	0	0	0	0	0	0	0	0	0	0	0	0	0	0	0	0	0	0	0	0	0	0	0	0	0	0	2
PO-09	279	Porphyromonas_sp_HOT_279	9	1	0	0	0	1	1	1	10	1	75	0	0	0	2	0	0	1	0	0	0	0	3	5	4	0	0	0	0	0	0	1	2	1	0	0	0	0	0	1	0	119
PO-24	279	Porphyromonas_sp_HOT_279	1	0	0	1	0	4	4	0	0	0	2	0	0	0	0	0	0	0	0	0	0	0	2	0	0	0	0	0	0	0	0	0	0	2	0	2	0	0	2	0	0	20
PO-27	284	Porphyromonas_sp_HOT_284	3	0	0	0	0	0	0	0	0	0	13	0	0	0	0	0	0	0	0	0	0	0	0	0	0	0	0	0	0	0	0	0	0	0	0	0	0	0	0	0	0	16
PO-11	285	Porphyromonas_sp_HOT_285	0	0	0	0	0	0	0	0	0	0	14	0	0	0	0	0	0	0	0	0	0	0	0	0	0	0	0	0	0	0	0	0	0	0	0	0	0	0	0	0	0	14
PO-26	930	Porphyromonas_sp_HOT_930	0	0	0	0	0	0	0	0	0	0	0	0	0	0	0	0	0	0	0	0	0	0	0	0	0	0	0	0	0	0	0	0	0	0	0	0	0	0	0	0	0	0
PO-13	785	Porphyromonas_uenonis	0	0	0	0	0	0	0	0	0	0	0	0	0	0	0	0	0	0	0	0	0	0	0	0	0	0	0	0	0	0	0	0	0	0	0	0	0	0	0	0	0	0
PR-76	943	Prevotella_aurantiaca	0	0	0	0	0	0	0	0	0	0	0	0	0	0	0	0	0	0	0	0	0	0	0	0	0	0	0	0	0	0	0	0	0	0	0	0	0	0	0	0	0	0
PR-01	553	Prevotella_baroniae	24	67	2863	3312	1480	756	139	295	134	17	0	0	0	0	0	0	0	0	0	0	0	1	0	0	0	0	1	0	0	0	0	0	0	0	0	0	0	0	0	0	0	9089
PR-02	556	Prevotella_bivia	0	0	0	0	0	0	0	0	0	0	0	0	0	0	0	0	0	0	0	0	0	0	0	0	0	0	0	0	0	0	0	0	0	0	0	0	0	0	0	0	0	0
PR-03	560	Prevotella_buccae	82	131	994	186	640	428	61	102	67	28	0	0	0	0	1	0	1	0	0	0	0	0	0	0	0	0	0	0	0	0	0	0	0	0	0	0	0	0	0	0	0	2721
PR-04	562	Prevotella_buccalis	0	0	0	0	0	0	0	0	0	0	0	0	0	0	0	0	0	0	0	0	0	0	0	0	0	0	0	0	0	0	0	0	0	0	0	0	0	0	0	0	0	0
PR-05	583	Prevotella_dentalis	131	25	33	19	16	1	0	0	0	0	3	0	0	0	0	0	0	0	0	0	0	0	0	0	0	0	0	0	0	0	0	0	0	0	0	0	0	0	0	0	0	228
PR-06	291	Prevotella_denticola	0	2	3	2	4	4	1	30	99	64	0	23	3	15	1322	766	526	4816	971	519	681	1	1	0	0	0	0	1	1	0	0	0	0	2	0	0	0	0	0	0	0	9857
PR-07	600	Prevotella_enoeca	0	0	0	0	0	0	0	0	0	0	0	0	0	0	0	0	0	0	0	1	0	0	0	0	0	0	0	0	0	0	0	0	0	0	0	0	0	0	0	0	0	1
PR-61	600	Prevotella_enoeca	0	0	0	0	0	0	0	0	0	0	0	0	0	0	0	0	0	0	0	0	0	0	0	0	0	0	0	0	0	0	0	0	0	0	0	0	0	0	0	0	0	0
PR-08	782	Prevotella_fusca	4	1	0	0	0	0	0	0	0	0	0	0	0	0	0	0	0	0	0	0	0	0	0	0	0	0	0	0	0	0	0	0	0	0	0	0	0	0	0	0	0	5
PR-62	782	Prevotella_fusca	0	0	0	0	0	0	0	0	0	0	0	0	0	0	0	0	0	0	0	0	0	0	0	0	0	0	0	0	0	0	0	0	0	0	0	0	0	0	0	0	0	0
PR-63	782	Prevotella_fusca	0	0	0	0	0	0	0	0	0	0	0	0	0	0	0	0	0	0	0	0	0	0	0	0	0	0	0	0	0	0	0	0	0	0	0	0	0	0	0	0	0	0
PR-09	298	Prevotella_histicola	1	2	0	4	2	0	1	3	4	2	1	3733	16619	2146	53	48	0	1	0	1	0	4384	1284	456	253	72	315	405	171	117	260	0	0	14	858	276	151	243	765	858	848	34351
PR-10	643	Prevotella_intermedia	0	0	0	0	0	0	0	0	0	0	0	0	0	0	0	0	0	0	0	0	0	0	0	0	0	0	0	0	0	0	0	0	0	0	0	0	0	0	0	0	0	0
PR-64	643	Prevotella_intermedia	0	0	0	0	0	0	0	0	0	0	0	0	0	0	0	0	0	0	0	0	0	0	0	0	0	0	0	0	0	0	0	0	0	0	0	0	0	0	0	0	0	0
PR-65	643	Prevotella_intermedia	4	15	17	0	1	0	0	0	0	1	0	0	0	0	0	0	0	0	0	0	0	0	0	2	0	0	3	0	0	0	0	0	0	0	0	0	0	0	0	0	0	43
PR-11	658	Prevotella_loescheii	0	0	0	0	0	0	0	0	0	0	0	0	0	0	0	0	0	0	0	0	0	0	0	0	0	0	0	0	0	0	0	0	0	0	0	0	0	0	0	0	0	0
PR-66	658	Prevotella_loescheii	0	0	0	0	0	0	0	0	0	0	0	0	0	0	0	0	0	0	0	0	0	0	0	0	0	0	0	0	0	0	0	0	0	0	0	0	0	0	0	0	0	0
PR-77	658	Prevotella_loescheii	0	0	0	0	0	0	0	0	0	0	0	0	0	0	0	0	0	0	0	0	0	0	0	0	0	0	0	0	0	0	0	0	0	0	0	0	0	0	0	0	0	0
PR-78	289	Prevotella_maculosa	2	0	2	0	1	0	0	0	0	0	0	41	57	76	112	77	53	1	92	36	119	0	0	0	0	0	0	1	0	0	0	0	0	0	0	0	0	0	0	0	0	670
PR-13	665	Prevotella_marshii	0	0	1	0	0	0	0	0	0	0	0	0	0	0	0	0	0	0	0	0	0	0	0	0	0	0	0	0	0	0	0	0	0	0	0	0	0	0	0	0	0	1
PR-68	665	Prevotella_marshii	0	0	0	0	0	0	0	0	0	0	0	0	0	0	0	0	0	0	0	0	0	0	0	0	0	0	0	0	0	0	0	0	0	0	0	0	0	0	0	0	0	0
PR-14	469	Prevotella_melaninogenica	150	17	520	322	141	14	14	2	21	2	19	70	3	10	4	1	0	1	1	0	0	4290	1221	429	259	114	336	406	212	130	300	16	2	14	842	326	144	308	737	813	872	13083
PR-15	378	Prevotella_micans	0	0	0	0	0	0	0	0	0	0	0	0	0	0	0	0	0	0	0	0	0	0	0	0	0	0	0	0	0	0	0	0	0	0	0	0	0	0	0	0	0	0
PR-69	378	Prevotella_micans	0	0	0	0	0	0	0	0	0	0	0	0	0	0	0	0	0	0	0	0	0	0	0	0	0	0	0	0	0	0	0	0	0	0	0	0	0	0	0	0	0	0
PR-16	685	Prevotella_multiformis	0	0	0	0	0	0	0	0	0	0	0	0	0	0	0	0	0	0	0	0	0	0	0	0	0	0	0	0	0	0	0	0	0	0	0	0	0	0	0	0	0	0
PR-17	794	Prevotella_multisaccharivorax	0	0	0	0	0	0	0	0	0	0	0	0	0	0	0	0	0	0	0	0	0	1	0	0	0	0	0	0	0	0	0	0	0	0	0	0	0	0	0	0	0	1
PR-79	299	Prevotella_nanceiensis	0	0	1	1	0	1	2	0	3	0	0	0	0	0	0	0	0	0	0	0	0	0	0	0	3	0	0	0	0	2	0	0	7	0	0	0	0	1	0	1	0	22
PR-18	693	Prevotella_nigrescens	1	0	0	3	1	0	0	0	1	0	0	1145	388	678	21	9	0	0	1	0	0	0	2	1	0	0	1	0	2	0	0	0	8	0	1	0	0	0	0	0	0	2263
PR-19	705	Prevotella_oralis	3	525	1859	1867	3067	1777	3880	4880	5343	3062	0	0	2	0	0	0	0	0	0	0	0	0	0	2	0	0	0	0	0	0	0	0	0	0	0	0	1	0	2	0	0	26270
PR-20	311	Prevotella_oris	58	2100	2641	156	96	59	23	19	82	91	3	285	406	150	5	3	0	0	0	0	0	0	0	0	0	0	2	1	0	0	0	0	1	0	0	1	0	0	0	0	4	6186
PR-21	288	Prevotella_oulorum	0	0	0	0	0	1	0	0	0	1	0	17	8	7	161	349	235	653	256	669	669	0	0	0	1	0	0	0	0	0	0	0	0	0	0	0	2	0	0	0	0	3029
PR-22	714	Prevotella_pallens	0	0	7	0	0	2	4	1	0	1	0	0	0	0	1	0	0	0	0	0	0	0	1	3	0	2	0	0	1	1	3	3	0	3	4	4	0	3	2	0	0	46
PR-70	714	Prevotella_pallens	3	2	0	0	0	0	1	0	0	0	0	0	0	0	0	0	0	0	0	0	0	0	1	0	2	0	0	0	0	0	0	0	0	1	0	1	0	1	0	0	0	12
PR-23	303	Prevotella_pleuritidis	131	0	0	0	0	0	0	0	0	0	119	0	0	0	1	0	0	0	0	0	0	0	0	0	0	0	0	0	1	0	0	0	0	0	0	0	0	0	0	0	0	252
PR-24	781	Prevotella_saccharolytica	0	0	0	2	0	0	0	0	0	0	0	0	0	1	0	0	1	1	3	0	0	0	0	0	0	0	0	0	0	0	0	0	0	0	0	0	0	0	0	0	0	8
PR-71	781	Prevotella_saccharolytica	342	187	236	116	55	2	1	0	0	0	0	207	217	406	781	410	1468	916	1139	697	651	0	0	0	0	0	0	0	0	0	0	0	0	0	0	0	0	0	0	0	0	7831
PR-72	781	Prevotella_saccharolytica	1	0	1	0	0	1	0	0	0	0	0	0	0	0	0	0	3	0	1	9	54	0	0	0	0	0	0	0	0	0	0	0	0	0	0	0	0	0	0	0	0	70
PR-25	307	Prevotella_salivae	2342	390	98	56	25	0	0	2	0	1	3	1041	549	930	860	900	257	0	0	0	0	0	1	0	1	12	1	1	5	0	2	7	1	5	3	2	4	3	1	2	6	7511
PR-26	885	Prevotella_scopos	0	0	0	0	0	0	0	0	0	0	0	0	0	0	0	0	0	0	0	0	0	0	0	0	0	0	0	0	0	0	0	0	0	0	0	0	0	0	0	0	0	0
PR-27	795	Prevotella_shahii	0	0	0	0	0	0	0	0	0	0	0	0	0	0	0	0	0	0	0	0	0	0	0	0	0	0	0	0	0	0	0	0	0	0	0	0	0	0	0	0	0	0
PR-29	292	Prevotella_sp_HOT_292	0	0	0	0	0	0	0	0	0	0	0	0	0	0	0	0	0	0	0	0	0	0	0	0	0	0	0	0	0	0	0	0	0	0	0	0	0	0	0	0	0	0
PR-30	293	Prevotella_sp_HOT_293	0	0	0	0	0	0	0	0	0	0	0	0	0	0	0	0	0	0	0	0	0	0	0	0	0	0	0	0	0	0	0	0	0	0	0	0	0	0	0	0	0	0
PR-33	300	Prevotella_sp_HOT_300	2	0	0	0	1	0	0	0	0	1	0	3286	9512	7060	405	916	158	1293	1219	305	739	0	0	0	0	1	0	0	0	0	0	0	1	0	0	0	0	0	1	0	1	24901
PR-35	301	Prevotella_sp_HOT_301	0	0	0	0	0	0	0	0	0	0	0	0	0	0	0	0	0	0	0	0	0	0	0	0	0	0	0	0	0	0	0	0	0	0	0	0	0	0	0	0	0	0
PR-36	304	Prevotella_sp_HOT_304	60	101	115	40	103	7	0	0	0	0	70	0	2	0	0	0	0	0	0	0	0	0	0	0	0	0	0	0	0	0	0	0	0	0	0	0	0	0	0	0	0	498
PR-37	305	Prevotella_sp_HOT_305	0	0	0	0	0	0	0	0	0	0	0	0	0	0	0	0	0	0	0	0	0	0	0	0	0	0	0	0	0	0	1	0	0	0	0	0	0	0	0	0	0	1
PR-39	309	Prevotella_sp_HOT_309	0	0	0	2	0	0	1	0	0	0	0	1	1	1	0	0	1	0	0	0	0	0	0	0	0	0	0	0	0	0	0	0	0	2	1	1	0	0	0	0	2	13
PR-41	315	Prevotella_sp_HOT_315	252	1	0	0	0	0	1	0	0	0	0	24	59	42	0	0	0	0	0	0	0	0	0	0	0	0	0	0	0	0	0	0	0	0	0	0	0	0	0	0	0	379
PR-42	317	Prevotella_sp_HOT_317	3	2	1	1	0	1	0	0	0	0	0	0	0	0	0	0	0	0	0	0	0	0	0	0	0	0	0	0	0	0	0	0	0	0	0	0	0	0	0	0	0	8
PR-73	317	Prevotella_sp_HOT_317	2	3	4	0	0	1	0	0	0	0	10	0	0	0	0	0	0	0	0	0	0	0	0	0	0	0	0	0	0	0	0	0	0	0	0	0	0	0	0	0	0	20
PR-74	317	Prevotella_sp_HOT_317	0	0	0	0	0	0	0	0	0	0	0	0	0	0	0	0	0	0	0	0	0	0	0	0	0	0	0	0	0	0	0	0	0	0	0	0	0	0	0	0	0	0
PR-43	376	Prevotella_sp_HOT_376	0	8	171	95	79	84	9	7	22	20	0	0	0	0	0	0	0	0	0	0	0	0	0	0	0	0	0	0	0	0	0	0	0	0	0	0	0	0	0	0	0	495
PR-44	396	Prevotella_sp_HOT_396	0	0	0	0	0	0	0	0	1	0	0	0	0	0	0	0	0	0	0	0	0	0	0	0	0	0	0	0	0	0	0	0	0	0	0	0	0	0	0	0	0	1
PR-45	443	Prevotella_sp_HOT_443	16	1	3	1	0	0	0	0	0	0	1	0	0	0	3	2	0	0	2	0	2	0	0	0	0	0	0	0	0	0	0	0	0	0	0	0	0	0	0	0	0	31
PR-46	472	Prevotella_sp_HOT_472	0	0	0	0	0	0	0	0	0	0	8	0	0	0	0	0	0	0	0	0	0	0	0	0	0	0	0	0	0	0	0	1	0	0	0	0	0	0	0	0	0	9
PR-47	475	Prevotella_sp_HOT_475	0	0	0	0	0	0	0	0	0	0	0	0	0	0	0	0	0	0	0	0	0	0	0	0	0	0	0	0	0	0	0	0	0	0	0	0	0	0	0	0	0	0
PR-48	515	Prevotella_sp_HOT_515	0	0	0	0	0	0	0	0	0	0	0	0	0	0	0	0	0	0	0	0	0	0	0	0	0	0	0	0	0	0	0	0	0	0	0	0	0	0	0	0	0	0
PR-49	526	Prevotella_sp_HOT_526	2	0	0	0	0	0	0	0	0	0	356	0	1	0	0	0	0	0	0	0	0	0	0	0	0	0	0	0	0	0	0	0	0	0	0	0	0	0	0	0	0	359
PR-50	820	Prevotella_sp_HOT_820	0	0	0	0	0	0	0	0	0	0	0	0	0	0	0	0	0	0	0	0	0	0	0	0	0	0	0	0	0	0	0	0	0	0	0	0	0	0	0	0	0	0
PR-80	942	Prevotella_sp_HOT_942	0	0	0	0	0	0	0	0	0	0	0	0	0	0	0	0	0	0	0	0	0	0	0	0	0	0	0	0	0	0	0	0	0	0	0	0	0	0	0	0	0	0
PR-51	572	Prevotella_veroralis	0	0	0	0	1	0	0	0	0	0	0	0	0	0	0	0	0	0	0	0	0	1	0	0	0	0	0	0	0	0	0	0	0	0	0	1	0	0	0	0	0	3
PR-52	191	Propionibacterium_acidifaciens	0	0	0	0	0	0	0	0	0	0	0	0	0	0	0	0	0	0	6	2	0	0	0	0	0	0	0	0	0	0	0	0	0	0	0	0	0	0	0	0	0	8
PR-53	530	Propionibacterium_acnes	0	0	0	0	0	0	0	0	0	0	0	0	0	0	0	0	0	0	0	0	0	0	0	0	0	0	0	0	0	0	0	0	0	0	0	0	0	0	0	0	0	0
PR-54	552	Propionibacterium_avidum	0	0	0	0	0	0	0	0	0	0	0	0	0	0	0	0	0	0	0	0	0	0	0	0	0	0	0	0	0	0	0	0	0	0	0	0	0	0	0	0	0	0
PR-75	552	Propionibacterium_avidum	0	0	0	0	0	0	0	0	0	0	0	0	0	0	0	0	0	0	0	0	0	0	0	0	0	0	0	0	0	0	0	0	0	0	0	0	0	0	0	0	0	0
PR-55	739	Propionibacterium_propionicum	0	0	0	0	0	0	0	0	0	0	0	0	0	0	0	0	0	0	0	0	0	0	0	0	0	0	0	0	0	0	0	0	0	0	0	0	0	0	0	0	0	0
PR-56	192	Propionibacterium_sp_HOT_192	0	0	0	0	0	0	0	0	0	0	0	0	0	0	0	0	0	0	0	0	0	0	0	0	0	0	0	0	0	0	0	0	0	0	0	0	0	0	0	0	0	0
PR-57	193	Propionibacterium_sp_HOT_193	0	0	0	0	0	0	0	0	0	0	0	0	0	0	0	0	0	0	0	0	0	0	0	0	0	0	0	0	0	0	0	0	0	0	0	0	0	0	0	0	0	0
PR-58	194	Propionibacterium_sp_HOT_194	0	0	0	0	0	0	0	0	0	0	0	0	0	0	0	0	0	0	0	0	0	0	0	0	0	0	0	0	0	0	0	0	0	0	0	0	0	0	0	0	0	0
PR-59	915	Propionibacterium_sp_HOT_915	0	0	0	0	0	0	0	0	0	0	0	0	0	0	0	0	0	0	0	0	0	0	0	0	0	0	0	0	0	0	0	0	0	0	0	0	0	0	0	0	0	0
PR-60	676	Proteus_mirabilis	1	0	2	1	0	0	2	0	2	2	0	1	5	0	1	1	0	1	1	2	1	4	0	0	0	0	1	2	1	1	1	0	1	0	1	0	0	2	1	0	1	39
PS-01	536	Pseudomonas_aeruginosa	0	0	0	0	0	0	0	0	0	0	0	0	0	0	0	0	0	0	0	0	0	0	0	0	0	0	0	0	0	0	0	0	0	0	0	0	0	0	0	0	0	0
PS-07	612	Pseudomonas_fluorescens	0	0	0	0	0	0	0	0	0	0	0	0	0	0	0	0	0	0	0	0	0	0	0	0	0	0	0	1	0	0	0	0	0	0	0	0	0	0	0	0	0	1
PS-03	834	Pseudomonas_otitidis	0	0	0	0	0	0	0	0	0	0	0	0	0	0	0	0	0	0	0	0	0	0	0	0	0	0	0	0	0	0	0	0	0	0	0	0	0	0	0	0	0	0
PS-04	32	Pseudomonas_sp_HOT_032	0	0	0	0	0	0	0	0	0	0	0	0	0	0	0	0	0	0	0	0	0	0	0	0	0	0	0	0	0	0	0	0	0	0	0	0	0	0	0	0	0	0
PS-06	538	Pseudoramibacter_alactolyticus	1	4	3	0	2	0	0	0	1	0	41	0	0	0	0	0	0	0	1	0	0	1	1	0	0	0	0	0	0	0	2	0	0	0	0	3	0	1	0	0	0	61
PY-01	357	Pyramidobacter_piscolens	1	0	3	1	1	1	1	0	0	0	0	0	0	0	0	1	0	0	0	0	0	1	0	0	0	0	0	0	1	1	1	0	0	0	2	1	0	0	0	1	1	18
RO-01	188	Rothia_aeria	0	2	0	2	0	0	0	0	0	0	0	1	0	1	0	2	0	0	0	0	0	4	1	0	0	0	4	0	0	1	0	5	4	0	0	0	0	0	2	0	2	31
RO-02	587	Rothia_dentocariosa	1	1	0	1	2	2	1	2	1	0	28	6	9	3	1	0	1	1	1	1	0	7	0	0	0	0	5	6	0	0	2	1	3	2	0	4	2	0	0	1	0	95
RO-03	681	Rothia_mucilaginosa	6	7	2	7	11	6	0	5	15	1	59	18	3	32	3	0	2	1	1	1	0	7	2	9	6	23	4	19	2	10	10	1	8	2	7	2	3	19	17	5	3	339
CL-03	75	Ruminococcaceae[G-1]_sp_HOT_075	0	0	0	0	0	0	0	0	0	1	1	0	0	0	0	0	0	0	0	0	0	2	1	1	0	0	0	0	0	0	0	0	0	2	0	3	0	0	0	2	3	16
CL-04	85	Ruminococcaceae[G-2]_sp_HOT_085	0	0	0	0	0	0	0	0	0	0	0	0	0	0	1	0	0	0	0	0	0	0	0	0	0	0	1	0	0	0	0	0	0	1	1	0	0	0	0	0	0	4
CL-05	366	Ruminococcaceae[G-3]_sp_HOT_366	0	0	0	0	0	0	0	0	0	0	0	0	0	0	0	0	0	0	0	0	0	0	0	0	0	0	0	0	0	0	0	0	0	0	0	0	0	0	0	0	0	0
CL-06	381	Ruminococcaceae[G-3]_sp_HOT_381	0	0	0	0	0	0	0	0	0	0	0	0	0	0	0	0	0	0	0	0	0	0	0	0	0	0	0	0	0	0	1	0	0	0	0	0	0	0	0	0	0	1
SC-01	642	Scardovia_inopinata	0	0	0	0	0	0	0	0	0	0	0	0	0	0	0	0	0	0	0	0	0	0	0	0	0	0	0	0	0	0	0	0	0	0	0	0	0	0	0	0	0	0
SC-02	195	Scardovia_wiggsiae	0	0	0	0	0	0	0	0	0	0	0	0	0	0	0	0	0	0	0	0	0	0	0	0	0	0	0	0	0	0	0	0	0	0	0	0	0	0	0	0	0	0
SC-03	26	Schlegelella_aquatica	0	0	0	0	0	0	0	0	0	0	0	0	0	0	0	0	0	0	0	0	0	0	0	0	0	0	0	0	0	0	0	0	0	0	0	0	0	0	0	0	0	0
LE-01	24	Schlegelella_thermodepolymerans	0	0	0	0	0	0	0	0	0	0	0	0	0	0	0	0	0	0	0	0	0	0	0	0	0	0	0	0	0	0	0	0	0	0	0	0	0	0	0	0	0	0
SE-34	124	Selenomonas_artemidis	0	0	0	0	0	0	0	0	0	0	0	0	0	0	0	0	0	0	0	0	0	0	0	0	0	0	0	0	0	0	0	0	0	0	0	0	0	0	0	0	0	0
SE-22	139	Selenomonas_dianae	18	4	1	0	0	3	66	76	26	26	0	1	2	12	0	0	4	0	1	2	0	0	0	0	0	0	0	0	0	0	0	0	0	1	0	0	0	0	0	0	0	243
SE-35	125	Selenomonas_flueggei	1	4	3	2	2	6	218	164	56	67	0	0	1	2	4	0	20	1	3	1	1	0	0	0	0	0	0	0	0	0	1	0	0	0	0	0	0	0	0	0	0	557
SE-36	125	Selenomonas_flueggei	8	0	0	0	0	0	0	0	0	0	0	0	0	0	0	1	4	0	0	5	6	0	0	0	0	0	0	0	0	0	0	0	0	0	0	0	0	0	0	0	0	24
SE-04	130	Selenomonas_noxia	0	0	0	0	0	0	0	0	0	0	1	0	0	0	0	0	0	0	0	0	0	0	0	0	0	0	0	0	0	0	0	0	0	0	0	0	0	0	0	0	0	1
SE-05	130	Selenomonas_noxia	0	0	0	0	0	0	0	0	0	0	0	0	0	0	0	0	0	0	0	0	0	0	0	0	0	0	0	0	0	0	0	0	0	0	0	0	0	0	0	0	0	0
SE-37	126	Selenomonas_sp_HOT_126	2	0	0	0	0	0	0	0	0	0	0	0	0	0	0	0	0	0	0	0	0	0	0	0	0	0	0	0	0	0	0	0	0	0	0	0	0	0	0	0	0	2
SE-06	133	Selenomonas_sp_HOT_133	0	0	0	0	0	0	0	0	0	0	0	0	0	0	0	0	0	0	0	0	0	0	0	0	0	0	0	0	0	0	0	0	0	0	0	0	0	0	0	0	0	0
SE-24	133	Selenomonas_sp_HOT_133	0	0	0	0	0	0	0	0	0	0	0	0	0	0	0	0	0	0	0	0	0	0	0	0	0	0	0	0	0	0	0	0	0	0	0	0	0	0	0	0	0	0
SE-07	134	Selenomonas_sp_HOT_134	0	0	0	0	0	0	0	0	0	0	0	0	0	0	0	0	0	0	0	0	0	0	0	0	0	0	0	0	0	0	0	0	0	0	0	0	0	0	0	0	0	0
SE-25	134	Selenomonas_sp_HOT_134	0	0	0	0	0	0	0	0	0	0	0	0	0	0	0	0	0	0	0	0	0	0	0	0	0	0	0	0	0	0	0	0	0	0	0	0	0	0	0	0	0	0
SE-26	134	Selenomonas_sp_HOT_134	0	0	0	0	0	0	0	0	0	0	41	0	0	0	0	0	0	0	0	0	0	0	0	0	0	0	0	0	0	0	0	0	0	0	0	0	0	0	0	0	0	41
SE-08	136	Selenomonas_sp_HOT_136	0	0	0	0	0	1	0	1	1	0	0	4	15	24	31	15	2	3	0	1	1	0	0	0	0	1	0	0	0	0	0	0	0	0	0	0	1	0	0	0	0	101
SE-27	136	Selenomonas_sp_HOT_136	0	0	0	2	0	1	0	0	0	0	0	0	0	0	0	0	0	0	0	0	0	0	0	0	0	0	0	0	0	0	0	0	0	0	0	0	0	0	0	0	0	3
SE-09	137	Selenomonas_sp_HOT_137	1	0	0	0	0	0	0	0	0	0	6	0	0	0	0	0	0	0	0	0	0	0	0	0	0	0	0	0	0	0	0	0	0	0	0	0	0	0	0	0	0	7
SE-28	137	Selenomonas_sp_HOT_137	0	0	0	0	0	0	0	0	0	0	0	0	1	0	0	0	0	0	0	0	0	0	0	0	0	0	0	0	0	0	0	0	0	0	0	0	0	0	0	0	0	1
SE-29	137	Selenomonas_sp_HOT_137	0	0	0	0	0	0	0	0	0	0	0	0	0	0	0	0	0	0	0	0	0	0	0	0	0	0	0	0	0	0	0	0	0	0	0	0	0	0	0	0	0	0
SE-38	146	Selenomonas_sp_HOT_146	13	2	0	0	0	0	0	0	0	0	0	0	0	0	0	0	0	0	0	0	0	0	0	0	0	0	0	0	0	0	0	0	0	0	0	0	0	0	0	0	0	15
SE-39	149	Selenomonas_sp_HOT_149	1	0	0	0	0	0	0	0	0	0	0	0	0	0	0	0	0	0	0	0	0	0	0	0	0	0	0	0	0	0	0	0	0	0	0	0	0	0	0	0	0	1
SE-14	388	Selenomonas_sp_HOT_388	0	0	0	0	0	0	0	0	0	0	0	0	0	0	0	0	0	0	0	0	0	0	0	0	0	0	0	0	0	0	0	0	0	0	0	0	0	0	0	0	0	0
SE-15	442	Selenomonas_sp_HOT_442	0	0	0	0	0	0	0	0	0	0	0	0	0	0	0	0	0	0	0	0	0	0	0	0	0	0	0	0	0	0	0	0	0	0	0	0	0	0	0	0	0	0
SE-16	478	Selenomonas_sp_HOT_478	0	0	0	0	0	0	0	1	0	0	0	2	1	1	3	0	0	0	0	0	0	0	0	0	0	0	0	0	0	0	0	0	0	0	0	0	0	0	0	0	0	8
SE-30	478	Selenomonas_sp_HOT_478	0	0	2	0	1	0	0	0	0	0	0	1	0	0	0	0	2	0	0	2	1	0	0	0	0	0	0	0	0	0	0	0	0	0	0	0	0	0	0	0	0	9
SE-17	501	Selenomonas_sp_HOT_501	0	0	0	0	0	0	0	0	0	0	0	0	0	0	0	0	0	0	0	0	0	0	0	0	0	0	0	0	0	0	0	0	0	0	0	0	0	0	0	0	0	0
SE-40	920	Selenomonas_sp_HOT_920	0	0	0	0	0	0	0	0	0	0	0	0	0	0	0	0	0	0	0	0	0	0	0	0	0	0	0	0	0	0	0	0	0	0	0	0	0	0	0	0	0	0
SE-41	936	Selenomonas_sp_HOT_936	0	0	0	0	0	0	0	0	0	0	0	0	0	0	0	0	0	0	0	0	0	0	0	0	0	0	0	0	0	0	0	0	0	0	0	0	0	0	0	0	0	0
SE-42	937	Selenomonas_sp_HOT_937	0	0	0	0	0	0	0	0	0	0	0	0	0	0	0	0	0	0	0	0	0	0	0	0	0	0	0	0	0	0	0	0	0	0	0	0	0	0	0	0	0	0
SE-18	151	Selenomonas_sputigena	0	0	0	0	0	0	0	0	0	0	0	3	5	9	0	13	0	0	0	0	0	0	0	0	0	0	0	0	0	0	0	0	0	0	0	0	0	0	0	0	0	30
SE-19	151	Selenomonas_sputigena	0	0	0	0	0	0	0	0	0	0	0	0	0	0	0	0	0	0	0	0	0	0	0	0	0	0	0	0	0	0	0	0	0	0	0	0	0	0	0	0	1	1
SE-31	151	Selenomonas_sputigena	0	0	0	0	0	0	0	0	0	0	0	0	0	0	0	0	0	0	0	0	0	0	0	0	0	0	0	0	0	0	0	0	0	0	0	0	0	0	0	0	0	0
SE-32	151	Selenomonas_sputigena	0	0	0	0	0	0	0	0	0	0	0	0	0	0	0	1	0	0	0	1	0	0	0	0	0	0	0	0	0	0	0	0	0	0	0	0	0	0	0	0	0	2
SE-33	151	Selenomonas_sputigena	0	0	0	0	0	0	0	0	0	0	0	0	0	0	0	0	0	0	0	0	0	0	0	0	0	0	0	0	0	0	0	0	0	0	0	0	0	0	0	0	0	0
SH-01	95	Shuttleworthia_satelles	3	2	0	0	0	0	0	0	0	0	0	4	1	15	1	7	0	8	10	11	10	0	0	0	0	0	0	0	0	0	0	0	0	0	0	0	0	0	0	0	0	72
SI-01	683	Simonsiella_muelleri	0	0	0	0	0	0	0	0	0	0	0	0	0	0	0	0	0	0	0	0	0	0	0	0	0	0	0	0	0	0	0	0	0	0	0	0	0	0	0	0	0	0
SL-01	602	Slackia_exigua	11	12	32	5	12	31	24	19	12	4	3	9	4	9	6	8	0	7	22	2	11	0	0	51	14	7	8	24	48	10	24	59	73	42	20	18	16	8	23	35	14	737
SN-01	844	Sneathia_amnionii	0	0	0	0	0	0	0	0	0	0	0	0	0	0	0	0	0	0	0	0	0	0	0	0	0	0	0	0	0	0	0	0	0	0	0	0	0	0	0	0	0	0
SN-02	837	Sneathia_sanguinegens	0	0	0	0	0	0	0	0	0	0	0	0	0	0	0	0	0	0	0	0	0	0	0	0	0	0	0	0	0	0	0	0	0	0	0	0	0	0	0	0	0	0
SO-01	678	Solobacterium_moorei	46	13	45	15	40	259	65	151	123	53	2	17	2	10	800	331	4	1	0	0	0	0	1	1	0	0	1	0	0	3	3	2	1	0	2	0	2	1	2	1	0	1997
SR-01	345	SR1[G-1]_sp_HOT_345	0	0	0	0	0	0	1	0	1	0	0	0	0	0	0	0	0	0	0	0	0	0	0	0	0	0	0	0	0	0	0	0	0	0	0	0	0	0	0	0	0	2
SR-02	874	SR1[G-1]_sp_HOT_874	0	0	2	0	0	0	0	0	0	0	0	0	0	0	0	0	0	0	0	0	0	0	0	0	0	0	0	0	0	0	0	0	0	0	0	0	0	0	0	0	0	2
SR-03	875	SR1[G-1]_sp_HOT_875	0	0	1	0	0	0	0	0	0	0	1	0	0	0	0	0	0	0	0	0	0	0	0	0	2	0	0	0	0	0	0	0	0	0	0	0	0	0	0	0	0	4
ST-03	663	Stenotrophomonas_maltophilia	0	0	0	0	0	0	0	0	0	0	0	0	0	0	0	0	0	0	0	0	0	0	0	0	0	0	0	0	0	0	0	0	0	0	0	0	0	0	0	0	0	0
ST-29	663	Stenotrophomonas_maltophilia	2	0	0	1	1	1	2	0	0	1	0	1	0	2	1	1	0	0	1	0	0	2	0	0	2	0	0	0	0	2	0	0	0	2	1	1	1	1	0	0	0	26
ST-30	419	Stomatobaculum_longum	8224	797	104	31	24	88	0	3	3	2	8	313	750	848	0	1	0	0	0	0	0	1	1	0	0	0	1	2	0	0	1	0	0	0	1	0	1	0	1	0	1	11206
ST-05	97	Stomatobaculum_sp_HOT_097	603	3	0	0	0	0	0	0	1	0	0	0	0	0	0	0	0	0	0	0	0	0	0	1	0	1	0	0	0	1	0	0	1	2	0	0	0	0	0	0	1	614
ST-06	373	Stomatobaculum_sp_HOT_373	10	285	801	675	917	411	56	95	98	58	41	0	0	0	0	0	0	0	1	0	0	0	0	0	0	0	0	0	0	0	0	0	0	0	0	0	0	0	0	0	0	3448
ST-07	910	Stomatobaculum_sp_HOT_910	7	1	0	1	0	1	0	0	0	0	0	331	9990	3146	95	710	112	0	0	0	0	1	0	1	0	0	0	0	0	0	0	1	0	0	0	0	0	0	0	1	0	14398
ST-08	537	Streptococcus_agalactiae	0	0	0	0	0	0	0	0	0	0	0	217	7	0	0	0	0	0	0	0	0	0	0	0	0	0	0	0	0	0	0	0	0	0	0	0	0	0	0	0	0	224
ST-09	543	Streptococcus_anginosus	5	9	5	8	5	200	1	0	0	0	2	20	8	17	47	278	1309	38	103	67	176	0	0	0	0	0	0	0	0	1	0	0	1	0	0	0	0	0	0	0	0	2300
ST-10	576	Streptococcus_constellatus	62	26	46	68	31	210	190	98	12	1	9	1	0	0	1	0	0	0	0	0	0	0	0	1	0	0	0	0	0	0	0	0	0	1	0	0	0	0	0	0	0	757
ST-12	594	Streptococcus_downei	0	0	0	0	0	0	0	0	0	0	0	0	0	0	0	0	0	0	0	0	0	0	0	0	0	0	0	0	0	0	0	0	0	0	0	0	0	0	0	0	0	0
ST-14	644	Streptococcus_intermedius	14	0	1	2	1	5	2	2	0	1	159	1	0	1	0	3	6	1	0	0	1	179	1	0	0	1	0	0	1	0	1	16	2	0	0	0	0	0	0	0	1	402
ST-15	686	Streptococcus_mutans	0	0	5	4	18	109	572	458	162	191	0	0	0	0	0	1	1	0	2	2	5	2	0	0	0	0	0	1	1	0	0	1	0	0	0	0	0	0	0	0	0	1535
ST-18	745	Streptococcus_pyogenes	0	0	0	0	0	0	0	0	0	0	0	0	0	0	0	0	0	0	0	0	0	0	0	0	0	0	0	0	0	0	0	0	0	0	0	0	0	0	0	0	0	0
ST-20	758	Streptococcus_sanguinis	7	16	31	45	35	11	14	8	161	185	14	4	4	15	19	9	3	0	3	3	0	2740	267	1432	1396	342	98	121	115	41	30	310	114	19	11	6	9	26	21	44	54	7783
ST-21	768	Streptococcus_sobrinus	0	0	0	0	0	0	0	0	0	0	0	0	0	0	0	0	0	0	0	0	0	0	0	8	20	2	9	7	22	6	3	1	0	0	0	0	10	19	11	3	1	122
SY-01	435	Syntrophomonadaceae[VIII][G-1]_sp_HOT_435	0	0	0	0	0	0	0	0	0	0	0	0	0	0	0	0	0	0	0	0	0	0	0	0	0	0	0	0	0	0	0	0	0	0	0	0	0	0	0	0	0	0
TA-01	613	Tannerella_forsythia	153	26	18	0	0	0	1	0	0	0	2438	0	1	15	0	0	2	1	0	0	0	0	0	0	0	0	0	2	1	0	0	0	0	0	0	0	0	0	0	0	0	2658
TA-02	286	Tannerella_sp_HOT_286	0	0	0	0	1	0	0	0	0	0	0	0	0	0	1	0	1	0	0	0	0	0	0	0	0	0	0	0	0	0	0	0	0	0	0	0	0	0	0	0	0	3
TA-08	808	Tannerella_sp_HOT_808	0	0	0	0	0	0	0	0	0	0	0	0	0	0	0	0	0	0	0	0	0	0	0	0	0	0	0	0	0	0	0	0	0	0	0	0	0	0	0	0	0	0
TA-04	916	Tannerella_sp_HOT_916	0	0	1	0	0	0	0	0	0	0	0	0	0	0	0	0	0	0	0	0	0	0	0	0	0	0	0	0	0	0	0	0	0	0	0	0	0	0	0	0	0	1
TA-05	916	Tannerella_sp_HOT_916	0	0	0	0	0	0	0	0	0	0	0	0	0	0	0	0	0	0	0	0	0	0	0	0	0	0	0	0	0	0	0	0	0	0	0	0	0	0	0	0	0	0
TA-06	916	Tannerella_sp_HOT_916	0	0	0	0	0	0	0	0	0	0	0	0	0	0	0	0	0	0	0	0	0	0	0	0	0	0	0	0	0	0	0	0	0	0	0	0	0	0	0	0	0	0
TM-01	346	TM7[G-1]_sp_HOT_346	0	0	0	1	0	0	0	0	0	0	0	0	0	0	0	0	0	0	0	0	0	0	0	0	0	0	0	0	0	0	0	0	0	0	0	0	0	0	0	0	0	1
TM-02	347	TM7[G-1]_sp_HOT_347	0	0	0	0	0	0	0	0	0	0	0	0	0	0	0	0	0	0	0	0	0	0	0	0	0	0	0	0	0	0	0	0	0	0	0	0	1	0	0	0	0	1
TM-03	348	TM7[G-1]_sp_HOT_348	0	0	0	0	0	0	0	0	0	0	0	0	0	0	0	0	0	0	0	0	0	0	0	0	0	0	0	0	0	0	0	0	0	0	0	0	0	0	0	0	0	0
TM-13	348	TM7[G-1]_sp_HOT_348	0	0	0	0	0	0	0	0	0	0	3	0	0	0	1	0	0	0	0	0	0	0	0	0	0	0	0	0	0	0	0	0	0	0	0	0	0	0	0	0	0	4
TM-04	349	TM7[G-1]_sp_HOT_349	0	0	0	0	0	0	0	0	0	0	0	0	0	0	0	0	0	0	0	0	0	0	0	0	0	0	0	1	0	0	0	0	0	0	0	0	0	0	0	0	1	2
TM-05	352	TM7[G-1]_sp_HOT_352	0	0	1	1	0	0	0	0	0	0	1	0	0	0	0	0	0	0	0	0	0	0	0	1	0	1	1	0	0	0	0	0	0	0	1	1	0	1	2	0	1	12
TM-07	488	TM7[G-1]_sp_HOT_488	0	0	0	0	0	0	0	0	0	0	0	0	0	0	0	0	0	0	0	0	0	0	0	0	0	0	0	0	0	0	0	0	0	0	0	0	0	0	0	0	0	0
TM-14	952	TM7[G-1]_sp_HOT_952	9	0	0	0	0	0	0	0	0	0	15	0	0	0	0	0	0	0	0	0	0	20	0	0	0	0	0	0	0	0	0	0	0	0	0	0	0	0	0	0	0	44
TM-08	350	TM7[G-2]_sp_HOT_350	0	0	0	0	0	0	0	0	0	0	0	0	0	0	0	0	0	0	0	0	0	0	0	0	0	0	0	0	0	0	0	0	0	0	0	1	0	0	0	0	0	1
TM-09	351	TM7[G-3]_sp_HOT_351	0	0	0	0	0	0	0	0	0	0	0	2	0	0	0	0	0	0	0	0	0	0	0	0	0	0	0	0	0	0	0	0	0	0	0	0	0	0	0	0	0	2
TM-10	355	TM7[G-4]_sp_HOT_355	0	0	0	0	0	0	0	0	0	0	0	0	0	0	0	0	0	0	0	0	0	0	0	0	0	0	0	0	0	0	0	0	0	0	0	0	0	0	0	0	0	0
TM-15	356	TM7[G-5]_sp_HOT_356	0	0	0	0	0	0	0	0	0	0	3	0	1	0	0	1	0	0	0	0	0	0	0	0	0	0	0	0	0	0	0	0	0	0	0	0	0	0	0	0	0	5
TM-16	870	TM7[G-6]_sp_HOT_870	0	0	0	0	0	0	0	0	0	0	0	0	0	0	0	0	0	0	0	0	0	0	0	0	0	0	0	0	0	0	0	0	0	0	0	0	0	0	0	0	0	0
TR-01	541	Treponema_amylovorum	0	0	0	0	0	0	0	0	0	0	0	0	1	0	0	0	0	0	0	3	0	0	0	0	0	0	0	0	0	0	0	0	0	0	0	0	0	0	0	0	0	4
TR-02	584	Treponema_denticola	0	0	2	0	0	0	0	0	0	0	28	0	0	0	2	0	0	0	0	0	0	0	0	0	0	0	0	0	0	0	1	0	0	0	0	0	0	0	0	0	0	33
TR-03	584	Treponema_denticola	0	0	2	0	0	0	0	0	0	0	20	0	0	0	0	0	0	0	0	0	0	0	0	0	0	0	0	0	0	0	0	0	0	0	0	0	0	0	0	0	0	22
TR-04	653	Treponema_lecithinolyticum	0	0	0	0	0	0	0	0	0	0	353	0	0	0	0	0	0	0	0	0	0	0	0	0	0	0	0	0	0	0	0	0	0	0	1	0	0	0	0	2	0	356
TR-05	664	Treponema_maltophilum	0	0	0	0	0	0	0	0	0	0	115	0	0	0	0	0	0	0	0	0	0	0	0	0	0	0	0	0	1	0	0	0	0	0	0	0	0	0	0	0	0	116
TR-06	805	Treponema_pallidum	0	0	0	0	0	0	0	0	0	0	0	0	0	0	0	0	0	0	0	0	0	0	0	0	0	0	0	0	0	0	0	0	0	0	0	0	0	0	0	0	0	0
TR-07	724	Treponema_parvum	0	0	0	0	0	0	0	0	0	0	13	0	0	0	0	0	0	0	0	0	0	0	0	0	0	0	0	0	0	0	0	0	0	0	0	0	0	0	0	0	0	13
TR-08	725	Treponema_pectinovorum	0	0	0	0	0	0	0	0	0	0	0	0	0	0	0	0	0	0	0	0	0	0	0	0	0	0	0	0	0	0	0	0	0	0	0	0	0	0	0	0	0	0
TR-55	743	Treponema_putidum	0	0	0	0	0	0	0	0	0	0	0	0	0	0	0	0	0	0	0	0	0	0	0	0	0	0	0	0	0	0	0	0	0	0	0	0	0	0	0	0	0	0
TR-51	769	Treponema_socranskii	0	0	0	0	0	0	0	0	0	0	0	0	0	0	0	0	0	0	0	0	0	0	0	0	0	0	0	0	0	0	0	0	0	0	0	0	0	0	0	0	0	0
TR-56	769	Treponema_socranskii	1	0	0	0	0	0	0	0	1	0	123	0	20	1	0	1	0	0	0	0	1	0	0	0	0	0	1	1	0	0	0	0	0	0	0	0	0	0	0	1	1	152
TR-11	769	Treponema_socranskii_subsp_paredis	0	0	0	0	0	0	0	0	0	0	0	0	0	0	0	0	0	0	0	0	0	0	0	0	0	0	0	0	0	0	0	0	0	0	0	0	0	0	0	0	0	0
TR-10	769	Treponema_socranskii_subsp_socranskii	0	0	0	0	0	1	0	0	0	0	5	0	0	0	0	0	0	0	0	0	0	0	0	0	0	0	0	0	0	0	0	0	0	0	0	0	0	0	0	0	0	6
TR-50	769	Treponema_socranskii_subsp_socranskii	0	0	0	0	0	0	0	0	0	0	11	0	0	0	0	3	0	0	0	0	0	0	0	0	0	0	0	0	0	0	0	0	0	0	0	0	0	0	0	0	0	14
TR-12	226	Treponema_sp_HOT_226	0	0	0	0	0	0	0	0	0	0	0	0	0	0	0	0	0	0	0	0	0	0	0	0	0	0	0	0	0	0	0	0	0	0	0	0	0	0	0	0	0	0
TR-13	227	Treponema_sp_HOT_227	0	0	0	0	0	0	0	0	0	0	1	0	0	0	0	0	0	0	0	0	0	0	0	0	0	0	0	0	0	0	0	0	0	0	0	0	0	0	0	0	0	1
TR-14	228	Treponema_sp_HOT_228	0	0	0	0	0	0	0	0	0	0	0	0	0	0	0	0	0	0	0	0	0	0	0	0	0	0	0	0	0	0	0	0	0	0	0	0	0	0	0	0	0	0
TR-52	228	Treponema_sp_HOT_228	0	0	0	0	0	0	0	0	0	0	0	0	0	0	0	0	0	0	0	0	0	0	0	0	0	0	0	0	0	0	0	0	0	0	0	0	0	0	0	0	0	0
TR-15	230	Treponema_sp_HOT_230	0	0	0	0	0	0	0	0	0	0	0	0	0	0	0	0	0	0	0	0	0	0	0	0	0	0	0	0	0	0	0	0	0	0	0	0	0	0	0	0	0	0
TR-57	231	Treponema_sp_HOT_231	0	0	1	0	0	0	0	0	0	0	0	0	0	0	0	0	0	0	0	0	0	0	0	0	0	0	0	0	0	0	0	0	0	0	0	0	0	0	0	1	0	2
TR-17	232	Treponema_sp_HOT_232	0	0	0	0	0	0	0	0	0	0	0	0	0	0	0	0	0	0	0	0	0	0	0	0	0	0	0	0	0	0	0	0	0	0	0	0	0	0	0	0	0	0
TR-18	234	Treponema_sp_HOT_234	0	0	0	0	0	0	0	0	0	0	56	0	0	0	0	0	0	0	0	0	0	0	0	0	0	0	0	0	0	0	0	0	0	0	0	0	0	0	0	0	0	56
TR-19	235	Treponema_sp_HOT_235	0	0	0	0	0	0	0	0	0	0	0	0	0	0	0	0	0	0	0	0	0	0	0	0	0	0	0	0	0	0	0	0	0	0	0	0	0	0	0	0	0	0
TR-20	236	Treponema_sp_HOT_236	0	0	0	0	0	0	0	0	0	0	0	0	0	0	0	0	0	0	0	0	0	0	0	0	0	0	0	0	0	0	0	0	0	0	0	0	0	0	0	0	0	0
TR-58	237	Treponema_sp_HOT_237	0	0	0	0	0	0	0	0	0	0	1	0	0	0	0	0	0	0	0	0	0	0	0	0	0	0	0	0	0	0	0	0	0	0	0	0	0	0	0	0	0	1
TR-59	237	Treponema_sp_HOT_237	0	0	0	0	0	0	0	0	0	0	49	0	0	0	0	0	0	0	0	0	0	0	0	0	0	0	0	0	0	0	0	0	0	0	0	0	0	0	0	0	0	49
TR-21	238	Treponema_sp_HOT_238	0	0	0	0	0	0	0	0	0	0	0	0	0	0	0	0	0	0	0	0	0	0	0	0	0	0	0	0	0	0	0	0	0	0	0	0	0	0	0	0	0	0
TR-22	239	Treponema_sp_HOT_239	0	0	0	0	0	0	0	0	0	0	43	0	0	0	0	0	0	0	0	0	0	0	0	0	0	0	0	0	0	0	0	0	0	0	0	0	0	0	0	0	0	43
TR-23	242	Treponema_sp_HOT_242	0	0	0	0	0	0	0	0	0	0	29	0	0	0	0	0	0	0	0	0	0	0	0	0	0	0	0	0	0	0	0	0	0	0	0	0	0	0	0	0	0	29
TR-24	246	Treponema_sp_HOT_246	0	0	0	0	0	0	0	0	0	0	0	0	0	0	0	0	0	0	0	0	0	0	0	0	0	0	0	0	0	0	0	0	0	0	0	0	0	0	0	0	0	0
TR-60	247	Treponema_sp_HOT_247	0	0	0	0	0	0	0	0	0	0	0	0	0	0	0	0	0	0	0	0	0	0	0	0	0	0	1	0	0	0	0	0	0	0	0	0	0	0	0	0	0	1
TR-26	249	Treponema_sp_HOT_249	0	0	0	0	0	0	0	0	0	0	0	0	0	0	0	0	0	0	0	0	0	0	0	0	0	0	0	0	0	0	0	0	0	0	0	0	0	0	0	0	0	0
TR-27	250	Treponema_sp_HOT_250	0	0	0	0	0	0	0	0	0	0	0	0	0	0	0	0	0	0	0	0	0	0	0	0	0	0	0	0	0	0	0	0	0	0	0	0	0	0	0	0	0	0
TR-28	252	Treponema_sp_HOT_252	0	0	0	0	0	0	0	0	0	0	9	0	0	0	0	0	0	0	0	0	0	0	0	0	0	0	0	0	0	0	0	0	0	0	0	0	0	0	0	0	0	9
TR-29	253	Treponema_sp_HOT_253	0	0	0	0	0	0	0	0	0	0	0	0	0	0	0	0	0	0	0	0	0	0	0	0	0	0	0	0	0	0	0	0	0	0	0	0	0	0	0	0	0	0
TR-30	254	Treponema_sp_HOT_254	0	0	0	0	0	0	0	0	0	0	113	0	0	0	0	0	0	0	0	0	0	1	0	0	0	0	0	0	0	0	0	0	0	0	0	0	0	0	0	0	0	114
TR-32	256	Treponema_sp_HOT_256	0	0	0	0	0	0	0	0	0	0	20	0	0	0	0	0	0	0	0	0	0	0	0	0	0	0	0	0	0	0	0	0	0	0	0	0	0	0	0	0	0	20
TR-33	257	Treponema_sp_HOT_257	0	0	0	0	0	0	0	0	0	0	92	0	0	0	0	0	0	0	0	0	0	0	0	0	0	0	0	0	0	0	0	0	0	0	0	0	0	0	0	0	0	92
TR-34	258	Treponema_sp_HOT_258	0	0	0	0	1	0	0	0	0	0	0	0	0	0	0	0	0	0	0	0	0	0	0	0	0	0	0	0	0	0	0	0	0	0	0	0	0	0	1	0	0	2
TR-35	260	Treponema_sp_HOT_260	0	0	0	0	0	0	0	0	0	0	0	0	0	0	0	0	0	0	0	0	0	0	0	0	0	0	0	0	0	0	0	0	0	0	0	0	0	0	0	0	0	0
TR-36	262	Treponema_sp_HOT_262	0	0	0	0	0	0	0	0	0	0	8	0	0	0	0	0	0	0	0	0	0	0	0	0	0	0	0	0	0	0	0	0	0	0	0	0	0	0	0	0	0	8
TR-53	262	Treponema_sp_HOT_262	0	0	0	0	0	0	0	0	0	0	193	0	0	0	0	0	0	1	0	0	0	0	0	0	0	0	0	0	0	0	0	0	0	0	0	0	0	0	0	0	0	194
TR-37	263	Treponema_sp_HOT_263	0	0	0	0	0	0	0	0	0	0	0	0	0	0	0	0	0	0	0	0	0	0	0	0	0	0	0	0	0	0	0	0	0	0	0	0	0	0	0	0	0	0
TR-38	264	Treponema_sp_HOT_264	0	0	0	0	0	0	0	0	0	0	0	0	0	0	0	0	0	0	0	0	0	0	0	0	0	0	0	0	0	0	0	0	0	0	0	0	0	0	0	0	0	0
TR-39	265	Treponema_sp_HOT_265	0	0	0	0	0	0	0	0	0	0	0	0	0	0	0	0	0	0	0	0	0	0	0	0	0	0	0	0	0	0	0	0	0	0	0	0	0	0	0	0	0	0
TR-40	268	Treponema_sp_HOT_268	0	0	0	0	0	0	0	0	0	0	0	0	0	0	0	0	0	0	0	0	0	0	0	0	0	0	0	0	0	0	0	0	0	0	0	0	0	0	0	0	0	0
TR-41	268	Treponema_sp_HOT_268	0	0	0	0	0	0	0	0	0	0	0	0	0	0	0	0	0	0	0	0	0	0	0	0	0	0	0	0	0	0	0	0	0	0	0	0	0	0	0	0	0	0
TR-42	269	Treponema_sp_HOT_269	0	0	0	0	0	0	0	0	0	0	0	0	0	0	0	0	0	0	0	0	0	0	0	0	0	0	0	0	0	0	0	0	0	0	0	0	0	0	0	0	0	0
TR-43	270	Treponema_sp_HOT_270	1	0	0	0	0	0	0	0	0	0	0	0	0	0	0	0	0	2	0	0	0	0	0	0	0	0	0	0	0	0	0	0	0	0	0	0	0	0	0	0	0	3
TR-44	271	Treponema_sp_HOT_271	0	0	0	0	0	0	0	0	0	0	0	0	0	0	0	0	0	0	0	0	0	0	0	0	0	0	0	0	0	0	0	0	0	0	0	0	0	0	0	0	0	0
TR-45	490	Treponema_sp_HOT_490	0	0	0	0	0	0	0	0	0	0	0	0	0	0	0	0	0	0	0	0	0	0	0	0	0	0	0	0	0	0	0	0	0	0	0	0	0	0	0	0	0	0
TR-46	508	Treponema_sp_HOT_508	0	0	0	0	0	0	0	0	0	0	0	0	0	0	0	0	0	0	0	0	0	0	0	0	0	0	0	0	0	0	0	0	0	0	0	0	0	0	0	0	0	0
TR-54	508	Treponema_sp_HOT_508	0	0	0	0	0	0	0	0	0	0	145	0	0	0	0	0	0	0	0	0	0	0	0	0	0	0	0	0	0	0	0	0	0	0	0	0	0	0	0	0	0	145
TR-47	517	Treponema_sp_HOT_517	0	0	0	0	0	0	0	0	0	0	0	0	0	0	0	0	0	0	0	0	0	0	0	0	0	0	0	0	0	0	0	0	0	0	0	0	0	0	0	0	0	0
TR-48	518	Treponema_sp_HOT_518	0	0	0	0	0	0	0	0	0	0	72	0	0	0	0	0	0	0	0	0	0	0	0	0	0	0	0	0	0	0	0	0	0	0	0	0	0	0	0	0	0	72
TR-61	927	Treponema_sp_HOT_927	0	0	0	0	0	0	0	0	0	0	0	0	0	0	0	0	0	0	0	0	0	0	0	0	0	0	0	0	0	0	0	0	0	0	0	0	0	0	0	0	0	0
TR-62	951	Treponema_sp_HOT_951	0	0	0	0	0	0	0	0	0	0	1	0	0	0	0	0	0	0	0	0	0	0	0	0	0	0	0	0	0	0	0	0	0	0	0	0	0	0	0	0	0	1
TR-49	29	Treponema_vincentii	0	0	0	0	0	0	0	0	0	0	0	0	0	0	0	0	0	0	0	0	0	0	0	0	0	0	0	0	0	0	0	0	0	0	0	0	0	0	0	0	0	0
TU-01	832	Turicella_otitidis	0	0	0	0	0	0	0	0	0	0	0	0	0	0	0	0	0	0	0	0	0	0	0	0	0	0	0	0	0	0	0	0	0	0	0	0	0	0	0	0	0	0
TU-02	832	Turicella_otitidis	0	0	0	0	0	0	0	0	0	0	0	0	0	0	0	0	0	0	0	0	0	0	0	0	0	0	0	0	0	0	0	0	0	0	0	0	0	0	0	0	0	0
VA-01	717	Variovorax_paradoxus	0	0	0	0	0	0	0	0	0	0	0	0	0	0	0	0	0	0	0	0	0	0	0	0	0	0	0	0	0	0	0	0	0	0	0	0	0	0	0	0	0	0
VE-20	524	Veillonella_atypica	1493	377	105	42	17	14	106	164	516	213	3	241	258	140	140	300	7	1	1	3	5	6	7	198	2163	414	1639	1577	2170	2573	2981	29012	7084	4060	6126	2703	5345	3685	4270	2481	3416	86056
VE-21	524	Veillonella_atypica	5355	1305	358	176	30	21	259	507	1609	775	9	4382	5841	8465	1132	2023	1241	3	24	235	230	10	8	228	2505	520	2042	1938	2767	3173	3867	33872	8607	5194	7649	3410	6034	4653	5499	3278	4224	133458
VE-02	887	Veillonella_denticariosi	0	0	0	0	2	1	0	0	0	1	0	0	0	1	5	4	3	3	1	3	1	26	8	3	9	7	1	8	3	10	7	3	1	0	2	2	4	1	0	2	1	123
VE-18	887	Veillonella_denticariosi	0	1	0	0	0	0	0	0	0	0	0	0	0	0	2	4	0	0	0	0	0	11	2	2	6	2	0	1	0	0	1	0	0	0	4	1	3	1	1	1	2	45
VE-03	160	Veillonella_dispar	7796	10240	19004	12898	14697	13656	6945	8603	12231	7541	7	1801	1894	1941	6829	5852	3808	8754	7742	17773	6157	56507	17495	10597	8104	7069	5218	3160	2813	3446	3826	195	280	252	581	1599	882	880	1678	2312	1670	304733
VE-05	161	Veillonella_parvula	7	21	89	81	46	77	6	1	7	0	0	1	0	1	1	2	1	4	3	5	0	5	3	6	11	8	5	2	2	2	4	0	1	0	2	3	0	2	3	1	1	414
VE-06	161	Veillonella_parvula	1337	666	1045	276	85	58	6	10	8	2	0	76	69	41	211	197	447	876	704	1091	544	4704	5519	7555	8179	7038	5272	3095	3085	3831	4082	7	9	8	44	23	82	497	1385	2302	1649	66115
VE-07	158	Veillonella_rogosae	2	3	5	1	0	1	2	0	3	2	0	0	0	0	3	0	0	0	0	0	0	3	3	1	0	0	1	0	0	1	1	0	1	0	0	0	0	1	0	0	0	34
VE-08	780	Veillonella_sp_HOT_780	29	0	0	0	0	0	0	0	0	0	6	1	0	0	0	0	0	0	0	0	0	0	0	0	0	0	0	0	0	0	0	0	0	0	0	0	0	0	0	0	0	36
VE-09	917	Veillonella_sp_HOT_917	7	1	0	0	0	0	0	0	0	2	0	1	0	0	0	0	1	0	0	0	0	0	0	0	0	1	0	0	1	0	0	0	0	0	0	0	1	0	0	0	0	15
VE-10	129	Veillonellaceae[G-1]_sp_HOT_129	1	0	0	0	0	1	0	0	0	0	0	2	0	0	0	0	1	1	0	0	0	0	0	0	0	0	0	0	0	0	0	1	0	0	0	0	0	0	0	0	0	7
VE-12	135	Veillonellaceae[G-1]_sp_HOT_135	0	0	0	0	0	0	0	0	0	0	0	0	0	0	0	0	0	0	0	0	0	0	0	0	0	0	0	0	0	0	0	0	0	0	0	0	0	0	0	0	0	0
VE-13	145	Veillonellaceae[G-1]_sp_HOT_145	0	0	0	0	0	0	0	0	0	0	62	0	0	0	0	0	0	0	0	0	0	0	0	0	0	0	0	0	0	0	0	0	0	0	0	0	0	0	0	0	0	62
VE-14	148	Veillonellaceae[G-1]_sp_HOT_148	0	0	0	0	0	0	0	0	0	0	0	0	0	0	0	0	0	0	0	0	0	0	0	0	0	0	1	0	0	0	0	0	0	0	0	0	0	0	0	0	0	1
VE-22	150	Veillonellaceae[G-1]_sp_HOT_150	0	0	0	0	0	0	0	0	0	0	0	0	0	0	0	0	0	0	0	0	0	0	0	0	0	0	0	0	0	0	0	0	0	0	0	0	0	0	0	0	0	0
VE-15	155	Veillonellaceae[G-1]_sp_HOT_155	0	0	0	0	0	0	0	0	0	0	0	6	0	0	0	0	0	0	0	0	0	0	0	0	0	0	0	0	0	0	0	0	0	0	0	1	0	1	0	0	0	8
VE-19	155	Veillonellaceae[G-1]_sp_HOT_155	0	0	0	0	0	0	0	0	0	0	0	0	0	0	0	0	0	0	0	0	0	0	0	0	0	0	0	0	0	0	0	0	0	0	0	0	0	0	0	0	0	0
VE-16	483	Veillonellaceae[G-1]_sp_HOT_483	0	0	0	0	0	0	0	0	0	0	0	0	1	0	0	0	0	0	0	0	0	0	0	0	0	0	0	0	0	0	0	0	0	0	0	0	0	0	0	0	0	1
VE-17	918	Veillonellaceae[G-1]_sp_HOT_918	0	0	0	0	0	0	0	0	0	0	0	0	0	0	0	0	0	0	0	0	0	0	0	0	0	0	0	0	0	0	0	0	0	0	0	0	0	0	0	0	0	0
GP-001		Achromobacter_Genus_probe	0	0	0	0	0	0	0	0	0	0	0	0	0	0	0	0	0	0	0	0	0	0	0	0	0	0	0	0	0	0	0	0	0	0	0	0	0	0	0	0	0	0
GP-002		Acinetobacter_Genus_probe	0	0	0	0	0	0	1	0	0	0	0	0	0	0	0	0	0	0	0	0	0	0	0	0	0	0	0	0	0	0	0	1	0	0	0	1	0	0	0	0	0	3
GP-003		Actinomyces_Genus_probe_3	2	1	1	4	7	5	1	1	1	2	42	0	0	0	0	0	0	0	1	0	0	12	2	4	5	1	0	0	0	1	0	71	9	0	0	0	1	0	0	2	0	176
GP-004		Actinomyces_Genus_probe_4	19	1	0	0	0	1	1	0	1	0	8	0	3	5	0	4	21	13	1	0	2	38	86	121	18	12	5	15	15	21	13	5	208	64	26	20	16	26	34	56	31	910
GP-099		Aggregatibacter_Genus_probe_1	2	0	0	0	0	0	0	0	0	0	10	0	0	0	0	0	0	0	0	0	0	0	0	0	0	1	0	0	0	2	0	0	0	0	0	0	0	0	0	0	0	15
GP-100		Aggregatibacter_Genus_probe_2	0	0	0	0	0	0	0	0	0	0	0	0	0	0	0	0	0	1	0	0	0	0	0	0	0	0	0	0	0	1	0	0	0	0	0	0	3	0	0	0	0	5
GP-005		Alloprevotella_Genus_probe	28	2	2	0	0	0	0	1	0	0	0	30	74	80	4	14	0	0	0	0	0	0	0	1	0	0	1	0	0	0	0	0	0	1	0	0	0	1	0	0	2	241
GP-101		Anaerococcus_Genus_probe_1	0	0	0	0	0	0	0	0	0	0	0	0	0	0	0	0	0	0	0	0	0	0	0	0	0	0	0	0	0	0	0	0	0	0	0	0	0	0	0	0	0	0
GP-006		Anaerococcus_Genus_probe_2	0	0	0	0	0	0	0	0	0	0	0	0	0	0	0	0	0	0	0	0	0	0	0	0	0	0	0	0	0	0	0	0	0	0	0	0	0	0	0	0	0	0
GP-008		Arcanobacterium_Genus_probe	0	0	0	0	0	0	0	0	0	0	0	0	0	0	0	0	0	0	0	0	0	0	0	0	0	0	0	0	0	0	0	0	0	0	0	0	0	0	0	0	0	0
GP-009		Atopobium_Genus_probe	14	4	3	4	2	2	14	16	10	16	2	26	6	32	18	30	14	30	25	22	59	0	0	86	185	158	185	133	277	285	301	16	49	280	369	434	185	135	513	276	184	4400
GP-010		Bacteroides_Genus_probe	29	39	179	89	109	81	16	25	58	64	0	0	0	0	0	0	0	0	0	0	0	0	0	0	0	0	0	0	0	0	0	0	0	0	0	0	0	0	0	0	0	689
GP-011		Bacteroidetes[G-3]_Genus_probe	0	0	0	0	0	0	0	0	0	0	4	0	0	0	0	0	0	0	0	0	0	0	0	0	0	0	0	0	0	0	0	0	0	0	0	0	0	0	0	0	0	4
GP-012		Bacteroidetes[G-5]_Genus_probe	0	0	0	0	0	0	0	0	1	0	3	0	0	0	0	0	0	0	0	0	0	0	1	0	0	0	0	1	0	0	0	0	0	0	0	0	0	0	0	0	0	6
GP-013		Bartonella_Genus_probe	0	0	0	0	0	0	0	0	0	0	0	0	0	0	0	0	0	0	0	0	0	0	0	0	0	0	0	0	0	0	0	0	0	0	0	0	0	0	0	0	0	0
GP-014		Bifidobacterium_Genus_probe_1	0	0	1	0	1	1	0	0	0	0	0	0	0	0	0	0	0	0	0	0	0	0	0	0	0	0	0	0	0	0	0	0	0	0	0	0	1	0	0	0	0	4
GP-015		Bifidobacterium_Genus_probe_2	0	0	0	0	0	0	0	0	0	0	0	0	0	0	0	0	0	0	0	0	0	0	0	0	0	0	0	0	0	0	0	0	0	0	0	0	0	0	0	0	0	0
GP-016		Bordetella_Genus_probe	0	0	0	0	0	0	0	0	0	0	0	0	0	0	0	0	0	0	0	0	0	0	0	0	0	0	0	0	0	0	0	0	0	0	0	0	0	0	0	0	0	0
GP-017		Brevundimonas_Genus_probe	0	0	1	0	0	0	0	0	0	0	0	0	0	0	0	0	0	0	0	0	0	0	0	0	0	0	0	0	0	0	0	0	0	0	0	0	0	0	0	0	0	1
GP-018		Burkholderia_Genus_probe	0	0	0	0	0	0	0	0	0	0	0	0	0	0	0	0	0	0	0	0	0	0	0	0	0	0	0	0	0	0	0	0	0	0	0	0	0	0	0	0	0	0
GP-102		Campylobacter_Genus_probe_1	1	0	0	0	0	0	0	0	0	0	6	0	0	1	0	1	0	0	0	5	32	0	0	0	0	0	0	0	0	0	0	0	0	0	0	0	0	0	0	0	0	46
GP-019		Campylobacter_Genus_probe_2	693	610	902	451	253	188	419	184	170	254	58	115	3655	250	4254	1198	2445	530	177	1021	1003	3384	330	175	177	53	48	1644	2253	3111	778	4	4	7	428	357	353	2158	1053	2388	2839	40374
GP-020		Capnocytophaga_Genus_probe_2	0	0	0	0	0	0	0	0	1	0	4	0	0	0	0	0	0	0	0	0	0	0	0	0	0	0	0	0	0	0	0	0	0	0	0	0	0	0	0	0	0	5
GP-021		Capnocytophaga_Genus_probe_3	12	14	24	13	16	9	37	32	26	37	3	10	38	144	393	130	234	3	59	61	69	0	0	1	1	3	4	12	14	7	7	0	0	45	58	30	10	8	20	4	0	1588
GP-022		Cardiobacterium_Genus_probe	1	1	0	0	0	0	0	0	0	0	0	0	0	0	0	0	0	0	0	0	0	0	0	0	0	0	0	0	0	0	1	0	0	0	0	0	0	0	0	0	0	3
GP-023		Catonella_Genus_probe	33	7	0	2	15	63	0	0	0	0	61	30	55	75	1	25	0	0	0	0	0	0	0	0	0	0	0	0	0	0	0	0	0	2	0	0	0	0	0	0	0	369
GP-024		Chlamydophila_Genus_probe	0	0	0	0	0	0	0	0	0	0	0	0	0	0	0	0	0	0	0	0	0	0	0	0	0	0	0	0	0	0	0	0	0	0	0	0	0	0	0	0	0	0
GP-025		Corynebacterium_Genus_probe	0	0	0	0	0	0	0	0	0	0	0	0	0	0	0	6	3	4	1	3	4	0	0	0	0	0	0	0	0	0	0	0	0	0	0	0	0	0	0	0	0	21
GP-026		Desulfobulbus_Genus_probe	0	0	0	0	0	0	0	0	0	0	25	0	0	0	0	0	0	0	0	0	0	0	0	0	0	0	0	0	0	0	0	0	0	0	0	0	0	0	0	0	0	25
GP-093		Dialister_Genus_probe_1	33	12	62	39	22	1	13	12	10	12	0	16	25	5	1	8	18	0	0	0	0	0	2	1	0	0	0	0	0	0	0	0	0	0	0	0	0	1	1	0	0	294
GP-094		Dialister_Genus_probe_2	39	29	39	56	41	19	20	28	38	25	1	34	71	65	55	186	94	146	44	44	45	0	0	0	1	5	13	20	5	10	24	0	3	44	100	68	63	59	13	15	32	1594
GP-028		Dietzia_Genus_probe	0	0	0	0	0	0	0	0	0	0	0	0	0	0	0	0	0	0	0	0	0	0	0	0	0	0	0	0	0	0	0	0	0	0	0	0	0	0	0	0	0	0
GP-029		Eggerthella_Genus_probe	0	0	0	0	0	0	0	0	0	0	0	0	0	0	0	0	0	0	0	0	0	0	0	0	0	0	0	0	0	0	0	0	0	0	0	0	0	0	0	0	0	0
GP-105		Enterococcus_Genus_probe_1	0	0	0	0	0	0	0	0	0	0	0	0	0	0	0	0	0	0	0	0	0	0	0	0	0	0	0	0	0	0	0	0	0	0	0	0	0	0	0	0	0	0
GP-106		Enterococcus_Genus_probe_2	0	0	0	0	0	0	0	0	0	0	0	0	0	0	0	0	0	0	0	0	0	0	0	0	0	0	0	0	0	0	0	0	0	0	0	0	0	0	0	0	0	0
GP-030		Enterococcus_Genus_probe_3	0	0	0	0	1	0	0	0	0	0	0	0	0	0	0	0	0	0	0	0	0	0	0	0	0	0	0	0	0	0	0	0	0	0	0	1	0	0	0	0	0	2
GP-031		Erysipelothrichaceae_Genus_probe	0	0	0	0	0	0	0	0	0	0	0	0	0	0	0	0	0	0	0	0	0	0	0	0	0	0	0	0	0	0	0	0	0	0	0	0	0	0	0	0	0	0
GP-032		Erysipelothrix_Genus_probe	0	0	0	0	0	0	0	0	0	0	0	0	0	0	0	0	0	0	0	0	0	0	0	0	0	0	0	0	0	0	0	0	0	0	0	0	0	0	0	0	0	0
GP-033		Escherichia_&_Shigella_Genus_probe	0	0	0	0	0	0	0	0	0	0	0	0	0	0	0	0	0	0	0	0	0	0	0	0	0	0	0	0	0	0	0	0	0	0	0	0	0	0	0	0	0	0
GP-034		Eubacterium_Genus_probe_1	0	0	0	0	0	0	1	0	0	0	173	1	0	0	0	0	0	0	0	0	0	0	0	0	0	0	0	0	0	0	0	0	0	0	0	0	0	0	0	0	0	175
GP-035		Eubacterium_Genus_probe_2	0	0	0	0	0	0	0	0	0	0	6	0	0	0	0	0	0	0	0	0	1	0	0	0	0	0	0	0	0	0	0	0	0	0	0	0	0	0	0	0	0	7
GP-036		Filifactor_Genus_probe	0	0	0	0	0	0	0	0	0	0	206	0	0	0	0	0	0	0	0	0	0	0	0	0	0	0	0	0	0	0	0	0	0	0	0	0	0	0	0	1	0	207
GP-108		Fretibacterium_Genus_probe_2	0	0	0	0	0	0	0	0	0	0	12	0	0	0	0	0	0	0	0	0	0	0	0	0	0	0	0	0	0	0	0	0	0	0	0	0	0	0	0	0	0	12
GP-037		Fretibacterium_Genus_probe_3	2	0	0	0	1	0	0	0	0	1	278	0	0	0	0	0	0	0	0	0	0	0	0	0	0	0	1	0	0	1	0	0	0	0	0	0	0	0	0	0	1	285
GP-109		Fusobacterium_Genus_probe_1	0	0	0	1	0	0	0	0	1	0	15	3	2	1	0	0	0	0	0	0	0	0	0	0	0	0	0	0	0	0	0	0	0	0	0	0	0	0	0	0	0	23
GP-095		Fusobacterium_Genus_probe_2	670	477	357	615	314	761	1258	1034	1591	577	476	460	1063	1359	1158	1021	1212	1204	1205	681	896	50	1154	1376	1144	796	755	1179	2110	1830	1992	9	483	622	883	865	1321	1206	1369	948	1269	39750
GP-096		Fusobacterium_Genus_probe_3	818	18	8	2	2	1	4	1	15	22	91	102	243	287	210	158	158	71	152	100	150	2	2	9	6	1	0	6	9	2	7	6	613	808	1049	1046	528	63	13	1	3	6787
GP-038		Fusobacterium_Genus_probe_4	1746	758	600	1118	634	1312	1752	1423	2183	907	813	730	1521	1639	2486	1826	1516	1963	1476	1136	1346	92	2276	2989	2204	1393	1683	2090	3091	3161	3254	59	2173	2671	3371	3598	3275	2550	1963	2196	2347	75321
GP-039		Gemella_Genus_probe	1	1	0	0	0	0	0	0	0	0	54	0	1	0	0	0	0	0	0	0	0	0	0	1	0	0	0	9	0	1	0	0	0	0	0	0	0	0	0	0	0	68
GP-110		Granulicatella_Genus_probe	0	0	0	0	0	0	0	0	0	0	0	0	0	0	0	0	0	0	0	0	0	0	0	0	0	0	0	0	0	0	0	0	0	0	0	0	0	0	0	0	0	0
GP-111		Haemophilus_Genus_probe_1	0	0	0	0	0	0	0	0	0	0	0	0	0	0	0	0	0	0	0	0	0	0	0	0	0	0	0	0	0	0	0	0	0	0	0	0	0	0	0	0	0	0
GP-112		Haemophilus_Genus_probe_2	0	0	0	0	0	0	0	0	0	0	0	0	0	0	0	0	0	0	0	0	0	0	0	0	0	0	0	0	0	0	0	0	0	0	0	0	0	0	0	0	0	0
GP-040		Haemophilus_Genus_probe_3	0	0	0	2	0	0	0	1	0	0	0	0	0	1	0	0	0	0	0	0	0	0	0	0	1	0	0	0	0	0	0	1	0	0	0	0	0	1	0	1	0	8
GP-041		Helicobacter_Genus_probe	0	0	0	0	0	0	0	0	0	0	0	0	0	0	0	0	0	0	0	0	0	0	0	0	0	0	0	0	0	0	0	0	0	0	0	0	0	0	0	0	0	0
GP-042		Johnsonella_Genus_probe	0	0	0	0	0	0	0	0	0	0	4	0	0	0	0	0	0	0	0	0	0	0	0	0	0	0	0	0	0	0	0	0	0	0	0	0	0	0	0	0	0	4
GP-113		Kingella_Genus_probe_1	0	0	0	0	0	0	0	0	0	0	0	0	0	0	1	0	0	0	0	0	0	0	0	0	0	0	0	0	0	0	0	0	0	0	0	0	0	0	0	0	0	1
GP-043		Kytococcus_Genus_probe	0	0	0	0	0	0	0	0	0	0	0	0	0	0	0	0	1	0	0	0	0	0	0	0	0	0	0	0	0	0	0	0	0	0	0	0	0	0	0	0	0	1
GP-044		Lachnoanaerobaculum_Genus_probe	2	1	0	0	1	1	2	0	1	0	0	40	20	23	71	21	0	5	8	0	1	18	37	17	14	11	4	7	52	31	26	6	110	39	75	9	29	17	41	40	29	809
GP-115		Lactobacillus_Genus_probe_1	0	0	0	0	0	0	0	0	0	0	0	0	0	0	0	0	0	0	0	0	0	0	0	0	0	0	0	0	0	0	0	0	0	0	0	0	0	0	0	0	0	0
GP-045		Lactobacillus_Genus_probe_2	0	0	0	0	0	0	0	0	0	0	0	0	0	0	0	0	0	0	0	0	0	0	0	0	0	0	0	0	0	0	0	0	0	0	0	0	0	0	0	0	0	0
GP-046		Lactobacillus_Genus_probe_3	0	0	1	4	4	12	3	6	0	1	0	9	53	93	27	9	30	34	11	27	54	5	2	2	0	2	0	0	1	0	1	4	5	1	0	0	0	1	0	1	1	404
GP-047		Lactobacillus_Genus_probe_4	0	0	0	0	0	0	0	0	0	0	0	0	0	0	0	0	0	0	0	0	0	0	0	0	0	0	0	0	0	0	0	0	0	0	0	0	0	0	0	0	0	0
GP-048		Lactobacillus_Genus_probe_5	0	0	0	0	0	0	0	0	0	0	0	0	0	0	0	0	0	0	0	0	0	0	0	0	0	0	0	0	0	0	0	0	0	0	0	0	0	0	0	0	0	0
GP-116		Leptotrichia_Genus_probe_1	0	0	0	0	0	0	0	0	0	0	0	0	0	0	0	0	0	0	0	0	0	0	0	0	0	0	0	0	0	0	0	0	0	0	0	0	0	0	0	0	0	0
GP-117		Leptotrichia_Genus_probe_2	0	0	0	0	0	0	0	0	0	0	0	0	0	0	0	0	0	0	0	0	0	0	0	0	0	0	0	0	0	0	0	0	0	0	0	0	0	0	0	0	0	0
GP-049		Leptotrichia_Genus_probe_3	0	0	3	0	0	0	0	0	0	0	0	1	2	0	3	1	0	0	0	0	0	3	1	0	0	0	0	3	1	1	0	0	1	1	2	0	0	0	0	1	0	24
GP-050		Leptotrichia_Genus_probe_4	0	0	1	0	0	0	1	0	0	0	3	0	0	0	0	0	0	0	0	0	0	0	0	0	0	0	1	1	0	0	2	1	0	0	0	0	0	0	0	1	0	11
GP-052		Listeria_Genus_probe	0	0	0	0	0	0	0	0	0	0	0	0	0	0	0	0	0	0	0	0	0	0	0	0	0	0	0	0	0	0	0	0	0	0	0	0	0	0	0	0	0	0
GP-053		Lysinibacillus_Genus_probe	0	0	0	0	0	0	0	0	0	0	0	0	0	0	0	0	0	0	0	0	0	0	0	0	0	0	0	0	0	0	0	0	0	0	0	0	0	0	0	0	0	0
GP-054		Mitsuokella_Genus_probe	0	0	0	0	0	0	0	0	0	0	0	0	0	0	0	0	0	0	0	0	0	0	0	0	0	0	0	0	0	0	0	0	0	0	0	0	0	0	0	0	0	0
GP-055		Mobiluncus_Genus_probe	0	0	0	0	0	0	0	0	0	0	0	0	0	0	0	0	0	0	0	0	0	0	0	0	0	0	0	0	0	0	0	0	0	0	0	0	0	0	0	0	0	0
GP-056		Mogibacterium_Genus_probe	0	0	0	0	0	0	1	1	0	0	58	1	0	0	0	1	0	0	0	0	0	0	0	0	0	0	0	0	0	1	0	0	0	0	0	0	0	0	0	0	0	63
GP-118		Moraxella_Genus_probe_1	0	0	0	0	0	0	0	0	0	0	0	0	0	1	0	0	0	1	0	0	0	0	0	0	0	0	0	0	0	0	0	0	1	0	0	0	0	0	0	0	0	3
GP-057		Moraxella_Genus_probe_2	0	0	0	0	0	0	0	0	0	0	0	0	0	0	0	0	0	0	1	0	0	0	0	0	0	0	0	0	0	0	0	0	0	0	0	0	0	0	0	0	0	1
GP-058		Mycobacterium_Genus_probe	0	0	0	0	0	0	0	0	0	0	0	0	0	0	0	0	0	0	0	0	0	0	0	0	0	0	0	0	0	0	0	0	0	0	0	0	0	0	0	0	0	0
GP-059		Mycoplasma_Genus_probe	0	0	0	0	0	0	0	0	0	0	0	0	0	0	0	0	0	0	0	0	0	0	0	0	0	0	0	0	0	0	0	0	0	0	0	0	0	0	0	0	0	0
GP-060		Neisseria_Genus_probe_2	2	5	3	7	5	8	3	1	11	0	0	2	1	0	0	0	0	1	1	0	0	16	4	4	0	0	2	3	0	2	1	0	2	2	4	2	15	33	11	0	2	153
GP-061		Olsenella_Genus_probe	0	0	0	0	0	0	0	0	0	0	0	0	0	0	0	0	0	0	0	0	0	0	0	0	0	0	0	0	0	0	0	0	0	0	0	0	0	0	0	0	0	0
GP-062		Paenibacillus_Genus_probe	0	0	0	0	0	0	0	0	0	0	0	0	0	0	0	0	0	0	0	0	0	0	0	0	0	0	0	0	0	0	0	0	0	0	0	0	0	0	0	0	0	0
GP-063		Parvimonas_Genus_probe	163	41	7	3	110	251	48	1	5	1	3175	36	10	3	2	11	60	9	44	20	1	1	2	5	26	113	47	95	126	54	50	3	35	49	190	281	91	188	202	195	230	5984
GP-064		Peptoniphilus_Genus_probe	0	0	0	0	0	0	0	0	0	0	0	0	0	1	0	0	0	0	0	0	0	0	0	0	0	0	0	0	0	0	0	0	0	0	0	0	0	0	0	0	0	1
GP-065		Peptostreptococcus_Genus_probe	19	2	10	4	10	13	23	2	6	1	0	20	56	10	2	20	0	0	0	0	0	0	0	0	0	0	0	0	0	0	0	0	0	0	0	0	0	1	0	0	0	199
GP-066		Porphyromonas_Genus_probe_1	0	0	0	2	0	0	0	0	0	0	2313	0	0	1	0	0	0	0	0	0	0	0	1	0	0	0	1	0	0	0	0	0	0	0	0	0	0	0	0	0	0	2318
GP-067		Porphyromonas_Genus_probe_2	2805	24	0	0	0	0	0	0	1	1	5	0	0	0	1	0	0	0	1	0	0	2	0	0	0	0	0	0	1	0	0	0	0	1	0	1	0	0	0	0	0	2843
GP-068		Porphyromonas_Genus_probe_3	0	0	0	0	0	0	0	0	0	0	0	0	0	0	0	0	0	0	0	0	0	0	0	0	0	0	0	0	0	0	0	0	0	0	0	0	0	0	0	0	0	0
GP-069		Prevotella_Genus_probe_2	104	521	917	144	133	96	94	104	181	122	19	204	204	133	413	333	194	930	290	119	250	1	0	0	0	0	2	2	0	0	0	1	0	1	0	2	0	0	0	0	0	5514
GP-070		Propionibacterium_Genus_probe	0	0	0	0	0	0	0	0	0	0	0	0	0	0	0	0	0	0	0	0	0	0	0	0	0	0	0	0	0	0	0	0	0	0	0	0	0	0	0	0	0	0
GP-071		Proteus_Genus_probe	0	0	0	0	1	0	1	1	2	0	1	0	1	3	0	1	2	0	2	0	0	1	1	1	2	1	1	1	1	0	2	0	1	1	3	2	1	8	1	1	4	48
GP-072		Pseudomonas_Genus_probe	0	0	1	0	0	0	0	0	0	0	0	1	0	0	0	0	0	1	0	0	0	1	1	0	0	0	0	1	0	2	0	0	1	1	0	3	0	1	0	0	1	15
GP-073		Rothia_Genus_probe	1	0	0	0	1	3	1	3	1	1	7	0	2	2	0	0	1	1	0	0	0	2	2	2	0	1	1	5	2	1	0	2	2	1	0	2	0	0	1	1	1	50
GP-074		Sanguibacter_Genus_probe	0	0	0	0	0	0	0	0	0	0	0	0	0	0	0	0	0	0	0	0	0	0	0	0	0	0	0	0	0	0	0	0	0	0	0	0	0	0	0	0	0	0
GP-075		Scardovia_Genus_probe	0	0	0	0	0	0	0	0	0	0	0	0	0	0	0	0	0	0	0	0	0	0	0	0	0	0	0	0	0	0	0	0	0	0	0	0	0	0	0	0	0	0
GP-076		Selenomonas_&_Centipeda_Genus_probe	21	7	3	4	9	8	29	76	15	15	11	5	6	15	5	5	24	4	4	4	0	0	0	0	0	0	0	0	1	0	0	0	1	0	0	0	0	0	0	0	0	272
GP-077		Slackia_Genus_probe	4	0	1	0	0	1	2	0	1	0	0	1	0	0	0	0	0	0	0	1	2	0	0	2	3	1	0	1	3	2	4	1	5	2	2	2	3	4	0	1	1	50
GP-078		Sphingomonas_Genus_probe	0	0	0	0	0	0	0	0	0	0	0	0	0	0	0	0	0	0	0	0	0	0	0	0	0	0	0	0	0	0	0	0	0	0	0	0	0	0	0	0	0	0
GP-079		SR1_Genus_probe	0	0	0	0	0	0	0	0	0	0	0	0	0	0	0	0	0	0	0	0	0	0	0	0	0	0	0	0	0	0	0	0	0	0	0	0	0	0	0	0	0	0
GP-124		Staphylococcus_Genus_probe_1	0	0	0	0	0	0	0	0	0	0	0	0	0	0	0	0	0	0	0	0	0	0	0	0	0	0	0	0	0	0	0	0	0	0	0	0	0	0	0	0	0	0
GP-125		Staphylococcus_Genus_probe_2	0	0	0	0	0	0	0	0	0	0	0	0	0	0	0	0	0	0	0	0	0	0	0	0	0	0	0	0	0	0	0	0	0	0	0	0	0	0	0	0	0	0
GP-080		Staphylococcus_Genus_probe_3	0	0	0	0	0	1	0	0	0	0	0	0	0	0	0	0	1	0	1	0	1	0	0	2	0	0	1	0	0	0	0	0	1	0	0	1	0	1	1	0	1	12
GP-126		Streptococcus_Genus_probe_1	167	13	28	23	29	5	6	3	43	65	72	3	4	3	15	7	27	1	1	2	2	1234	160	619	529	170	65	65	49	25	33	1227	8120	1500	2253	877	288	147	265	270	283	18698
GP-127		Streptococcus_Genus_probe_2	0	0	0	0	1	0	0	0	0	0	1	0	0	0	0	0	0	0	0	0	0	1	0	0	0	0	0	0	0	0	1	0	0	0	0	0	0	0	0	1	3	8
GP-128		Streptococcus_Genus_probe_3	13	0	0	0	0	0	0	0	0	0	0	5	0	0	0	0	0	0	0	0	0	28	5	1	4	1	0	0	0	0	0	51	3	5	2	2	1	0	2	1	0	124
GP-081		Streptococcus_Genus_probe_4	3090	4801	6173	12238	10019	4801	5767	2189	992	1689	2178	687	1987	1480	4804	3876	579	122	559	1145	824	15713	1026	1345	3886	5222	3161	13996	7134	9128	11682	49403	20070	14492	2173	1670	3935	14531	8987	33967	35551	327072
GP-082		Tannerella_Genus_probe	3	1	1	0	0	0	0	0	0	0	62	0	0	0	0	0	0	0	0	0	1	0	0	1	0	0	0	0	0	0	0	0	0	0	0	0	0	0	0	0	1	70
GP-083		TM7_Genus_probe	0	0	0	1	0	0	0	0	0	0	16	17	89	62	3	3	0	1	0	0	0	6	0	0	0	0	0	1	0	0	0	0	0	1	0	1	0	0	1	0	0	202
GP-129		Treponema_Genus_probe_1	0	0	0	0	0	0	0	0	0	0	0	0	0	0	0	0	0	0	0	0	0	0	0	0	0	0	0	0	0	0	0	0	0	0	0	0	0	0	0	0	0	0
GP-084		Treponema_Genus_probe_2	0	0	0	0	0	0	0	0	0	0	173	0	0	0	0	0	0	0	0	0	0	0	0	0	0	0	0	0	0	0	0	0	0	0	0	0	0	0	0	0	0	173
GP-085		Treponema_Genus_probe_3	0	0	0	0	0	0	0	0	0	0	1032	1	0	0	0	0	0	0	0	0	0	0	0	0	0	0	1	0	0	0	0	0	0	0	0	0	0	0	0	0	0	1034
GP-086		Treponema_Genus_probe_4	0	0	0	0	0	0	0	0	0	0	186	0	0	0	0	0	0	0	0	0	0	2	0	0	0	0	0	0	0	0	0	0	0	0	0	0	0	0	0	0	0	188
GP-087		Treponema_Genus_probe_5	0	0	0	0	0	0	0	0	0	0	63	0	1	0	0	0	0	0	0	0	0	0	0	0	0	0	0	0	0	0	0	0	0	0	1	0	0	0	0	0	0	65
GP-088		Treponema_Genus_probe_6	0	0	0	0	0	0	0	0	0	0	110	0	3	0	0	0	0	0	0	0	0	0	0	0	0	0	0	0	0	0	1	0	0	0	0	0	0	0	0	0	0	114
GP-130		Veillonella_Genus_probe_1	503	140	18	12	5	2	55	76	214	100	1	200	279	567	376	523	234	0	4	19	34	2	2	9	56	11	48	36	121	118	189	227	187	168	225	124	209	73	220	69	123	5579
GP-089		Veillonella_Genus_probe_2	5018	4839	7715	6112	7177	5839	3199	3888	5584	3378	18	604	809	1103	2701	3090	3089	7099	6199	13031	4430	30773	16829	18964	20207	15769	12496	7486	6984	8724	9232	1669	2076	1839	3761	8896	4271	2829	4627	6143	4229	282726
GP-131		Veillonellaceae_Genus_probe_1	0	0	0	0	0	0	0	0	0	0	0	0	0	0	0	0	0	0	0	0	0	0	0	0	0	0	0	0	0	0	0	0	0	0	0	0	0	0	0	0	0	0
GP-091		Veillonellaceae_Genus_probe_2	0	0	0	0	0	0	0	0	0	0	0	0	0	0	0	0	0	0	0	0	0	0	0	0	0	0	1	0	0	0	0	0	0	0	0	0	0	0	0	0	0	1
GP-090		Veillonellaceae_Genus_probe_3	0	0	0	0	0	0	0	0	0	0	10	1	0	0	0	0	0	0	0	0	0	0	0	0	0	0	0	0	0	0	0	0	0	0	0	0	0	0	0	0	0	11
GP-092		Yersinia_Genus_probe	0	0	0	0	0	0	0	0	0	0	0	0	0	0	0	0	0	0	0	0	0	0	0	0	0	0	0	0	0	0	0	0	0	0	0	0	0	0	0	0	0	0
unmatched		Unmatched Reads	39602	19171	18293	24749	16265	27369	41089	37697	53018	22643	24630	21638	44036	53558	54754	44207	46345	66390	56293	51689	50494	37124	56807	58067	49238	32237	33650	46195	71761	68469	73083	16707	45007	57461	71947	79682	78536	55735	39279	37352	47680	1869947
Reads matched uniquely with 1 species probe			49018	29484	51919	30497	35604	28161	26138	23592	31835	20293	35620	27883	68373	48703	37277	33455	40555	46343	35282	38936	27925	76093	39688	38806	39909	28801	27896	28465	40548	39852	40926	66205	34674	31495	48780	37182	40933	30562	35059	30911	31676	1555354
Reads matched uniquely with 1 genus probe			16058	12369	17061	20950	18923	13485	12772	9109	11163	7291	11869	3395	10284	7444	17004	12508	9957	12174	10267	17441	9207	51387	21926	25738	28469	23725	18527	26812	22250	26522	27601	52767	34163	22648	14975	18295	14599	24042	19338	46580	47168	828263
