# Supplementary material for: Consistent and reproducible long-term in vitro growth of health and disease-associated oral subgingival biofilms
Source: BMC Microbiol. 2018 Jul 11;18:70. doi: 10.1186/s12866-018-1212-x (PMC6042318; doi:10.1186/s12866-018-1212-x)
Supplement: Supplementary file 2 — Table S2. Per sample total read counts and absolute read counts for each species and genus detected by QIIME analysis of raw fasta files. Tab 1 (otu_table_L6) is all taxonomic assignments down to genus level. Tab 2 (otu_table_L7) is all taxonomic assignments down to species level. Tab 3 (CompHOMINGS-qiime) has total, matched, and unmatched read counts for each biofilm for HOMINGS and QIIME analysis, as well as the total number of species detected by each method. (XLSX 135 kb) [file 12866_2018_1212_MOESM2_ESM.xlsx]

## Sheet: otu_table_L6
# Constructed from biom file	Abundance																																											Prevalence
#OTU ID	DB2G1	DB2G2	DB2G3	DB2G4	DB2G5	DB2G6	DB2G7	DB2G8	DB2G9	DB2G10	DB3G0	DB3G1	DB3G2	DB3G3	DB3G4	DB3G5	DB3G6	DB3G7	DB3G8	DB3G9	DB3G10	HB1G1	HB1G2	HB1G3	HB1G4	HB1G5	HB1G6	HB1G7	HB1G8	HB1G9	HB1G10	HB2G1	HB2G2	HB2G3	HB2G4	HB2G5	HB2G6	HB2G7	HB2G8	HB2G9	HB2G10	Sum		DB2G1	DB2G2	DB2G3	DB2G4	DB2G5	DB2G6
k__Bacteria;p__Fusobacteria;c__Fusobacteriia;o__Fusobacteriales;f__Fusobacteriaceae;g__Fusobacterium	37508	12076	9472	17435	8192	20519	35329	29180	43093	17089	20660	19831	45927	53209	39768	39844	45902	47154	39629	30176	28973	1244	50303	59280	49652	34782	35121	49752	74736	73072	75733	334	42923	61074	76540	85001	84867	58424	38202	37796	45609	1675411		1	1	1	1	1	1
k__Bacteria;p__Firmicutes;c__Clostridia;o__Clostridiales;f__Veillonellaceae;g__Veillonella	16196	13014	21315	13970	15401	13434	7049	9411	14794	8578	31	5710	9168	11538	6884	10799	7223	12143	10634	26885	8039	93261	35759	29864	33756	25177	21148	13882	14334	17441	19401	50568	13543	8733	14362	13326	13718	9907	13649	13207	11280	708532		1	1	1	1	1	1
k__Bacteria;p__Firmicutes;c__Bacilli;o__Lactobacillales;f__Streptococcaceae;g__Streptococcus	2699	3142	4307	8532	6642	3261	4177	1788	842	1335	4258	1048	963	2959	1291	2504	1153	94	400	702	513	17446	1106	1942	3940	3848	1956	10004	4955	6409	8167	41321	20427	12113	3092	1816	3060	10392	6249	25315	25379	261547		1	1	1	1	1	1
k__Bacteria;p__Firmicutes;c__Clostridia;o__Clostridiales;f__Veillonellaceae;g__Megasphaera	9095	4291	7221	4017	5750	10732	7053	19771	18409	12508	3	812	7339	560	4431	2364	3911	16233	12694	12358	13254	2	3	1	1	0	1	2	1	0	0	1	2	0	5	1	1	2	1	1	1	172832		1	1	1	1	1	1
k__Bacteria;p__Firmicutes;c__Clostridia;o__Clostridiales;f__Lachnospiraceae;g__Oribacterium	2519	6556	6779	2098	4519	3779	4803	2368	4640	2306	0	195	1636	1212	2788	1846	1332	1278	2728	1294	2742	4	642	1439	1893	1107	1289	1367	4608	3687	1794	22	3034	2364	4082	1686	4478	1422	2358	2226	814	97734		1	1	1	1	1	1
k__Bacteria;p__Bacteroidetes;c__Bacteroidia;o__Bacteroidales;f__Prevotellaceae;g__Prevotella	2159	2494	5975	3541	3180	1695	2938	3921	4182	2381	393	5823	7306	2225	17537	1996	1788	4940	2281	1428	1779	6147	1568	518	354	128	389	570	266	159	367	44	14	41	1154	397	218	368	928	1179	1170	95941		1	1	1	1	1	1
k__Bacteria;p__Proteobacteria;c__Epsilonproteobacteria;o__Campylobacterales;f__Campylobacteraceae;g__Campylobacter	734	508	801	377	199	164	530	300	260	286	429	203	456	5953	3476	1917	3731	2180	1099	1814	2268	3539	294	162	169	49	48	1423	1954	2772	658	2	4	7	368	303	314	1878	912	2177	2474	47192		1	1	1	1	1	1
k__Bacteria;p__Actinobacteria;c__Coriobacteriia;o__Coriobacteriales;f__Coriobacteriaceae;g__Atopobium	118	23	76	57	33	15	96	99	119	119	16	240	401	108	46	229	122	229	163	160	269	0	5	792	1691	1429	1150	1200	2395	2596	3001	178	382	2691	2702	3127	1777	1016	3898	2144	1594	36506		1	1	1	1	1	1
k__Bacteria;p__Firmicutes;c__Clostridia;o__Clostridiales;f__Veillonellaceae;g__Dialister	903	482	1747	1499	914	438	566	849	755	737	7	828	910	774	1779	1152	998	1520	792	484	575	0	2	0	5	2	19	25	7	16	28	1	5	52	132	84	89	79	14	32	28	19329		1	1	1	1	1	1
k__Bacteria;p__Firmicutes;c__Clostridia;o__Clostridiales;f__[Tissierellaceae];g__Parvimonas	110	21	4	4	69	133	29	2	1	2	4793	111	6	5	44	12	134	15	96	95	3	3	0	7	214	796	238	787	641	283	188	1	179	195	1417	2041	896	1753	865	1546	919	18658		1	1	1	1	1	1
k__Bacteria;p__Bacteroidetes;c__Bacteroidia;o__Bacteroidales;f__Bacteroidaceae;g__Bacteroides	355	746	4660	2555	2980	1694	212	484	1192	1543	11	1	0	0	0	0	0	0	0	0	0	0	0	0	0	0	0	0	0	0	0	0	0	0	0	0	0	0	0	0	1	16434		1	1	1	1	1	1
k__Bacteria;p__Firmicutes;c__Clostridia;o__Clostridiales;f__Lachnospiraceae;g__	41	8	8	4	5	9	24	6	25	3	457	410	211	608	166	182	6	42	46	2	18	391	335	138	222	129	69	76	378	243	287	70	1065	446	937	134	467	318	422	674	272	9354		1	1	1	1	1	1
k__Bacteria;p__Firmicutes;c__Bacilli;o__Lactobacillales;f__Enterococcaceae;g__Enterococcus	0	0	0	0	0	0	0	1	1	0	1	51	439	41	266	146	3503	572	556	845	741	0	1	0	0	0	0	0	0	0	0	1	0	0	1	1	0	0	0	0	0	7167		0	0	0	0	0	0
k__Bacteria;p__Firmicutes;c__Bacilli;o__Lactobacillales;f__Enterococcaceae;g__Vagococcus	23	3	1	0	2	0	1	0	1	0	5	42	8	0	1	1	44	33	11	20	2	499	263	383	316	166	190	185	120	94	235	720	693	199	772	287	140	161	279	182	246	6328		1	1	1	0	1	0
k__Bacteria;p__Bacteroidetes;c__Flavobacteriia;o__Flavobacteriales;f__Flavobacteriaceae;g__Capnocytophaga	21	34	108	31	64	20	134	115	92	152	20	53	602	1130	134	378	812	8	218	193	321	1	4	12	16	14	25	67	88	43	53	0	12	334	461	192	79	75	97	47	18	6278		1	1	1	1	1	1
k__Bacteria;p__Firmicutes;c__Clostridia;o__Clostridiales;f__Veillonellaceae;g__Selenomonas	61	126	118	95	62	165	632	815	316	412	14	109	243	518	70	186	565	380	279	370	533	0	0	1	0	0	0	0	3	0	0	1	1	0	0	0	0	4	0	1	0	6080		1	1	1	1	1	1
k__Bacteria;p__Firmicutes;c__Clostridia;o__Clostridiales;f__[Mogibacteriaceae];g__	40	18	59	18	32	26	60	29	36	13	4524	14	8	6	24	26	1	0	0	0	0	0	2	3	0	0	2	1	1	0	0	0	1	0	1	0	1	0	1	1	0	4948		1	1	1	1	1	1
k__Bacteria;p__Firmicutes;c__Bacilli;o__Bacillales;f__Planococcaceae;g__	19	0	2	1	2	0	0	0	0	1	2	32	1	0	0	0	22	21	7	18	3	304	192	248	212	103	116	90	74	73	135	327	331	78	391	143	94	82	126	94	124	3468		1	0	1	1	1	0
k__Bacteria;p__Bacteroidetes;c__Bacteroidia;o__Bacteroidales;f__Porphyromonadaceae;g__Porphyromonas	1615	12	0	0	0	0	1	1	3	1	1797	0	2	1	2	0	0	1	1	0	0	3	5	4	3	0	1	2	0	0	0	1	1	3	0	2	0	0	1	1	2	3466		1	1	0	0	0	0
k__Bacteria;p__Firmicutes;c__Clostridia;o__Clostridiales;f__Peptostreptococcaceae;g__Peptostreptococcus	381	40	163	129	80	188	276	51	103	34	0	349	120	55	979	284	0	0	0	0	0	0	0	2	2	1	0	0	0	0	0	0	1	0	0	1	0	2	3	0	1	3245		1	1	1	1	1	1
k__Bacteria;p__Firmicutes;c__Clostridia;o__Clostridiales;f__Peptostreptococcaceae;g__Filifactor	0	1	0	0	0	0	1	1	0	0	2646	1	0	0	1	0	0	0	0	0	0	0	0	0	0	0	1	0	1	0	0	0	0	0	1	1	0	0	0	0	1	2656		0	1	0	0	0	0
k__Bacteria;p__Firmicutes;c__Clostridia;o__Clostridiales;f__Lachnospiraceae;g__Moryella	148	182	509	383	542	190	27	48	47	29	27	11	71	0	172	15	1	0	1	0	0	0	0	1	0	0	0	0	0	0	1	0	0	0	0	0	0	0	0	0	0	2405		1	1	1	1	1	1
k__Bacteria;p__Spirochaetes;c__Spirochaetes;o__Spirochaetales;f__Spirochaetaceae;g__Treponema	0	0	2	0	0	0	0	0	1	0	2013	0	0	0	10	1	0	2	0	0	2	0	0	0	0	0	2	1	1	0	1	0	0	0	2	0	0	0	0	3	1	2042		0	0	1	0	0	0
k__Bacteria;p__Bacteroidetes;c__Bacteroidia;o__Bacteroidales;f__Porphyromonadaceae;g__Tannerella	82	11	10	0	0	0	0	0	0	0	1787	0	5	0	0	0	1	0	0	0	0	0	0	1	0	0	0	2	1	0	0	0	0	0	0	0	0	0	0	0	0	1900		1	1	1	0	0	0
k__Bacteria;p__Firmicutes;c__Bacilli;o__Lactobacillales;f__Carnobacteriaceae;g__Granulicatella	8	0	2	1	0	3	0	1	0	0	68	8	0	1	0	0	1	2	0	3	0	131	35	61	37	26	40	36	34	32	72	349	240	64	94	22	32	51	92	79	140	1765		1	0	1	1	0	1
k__Bacteria;p__Synergistetes;c__Synergistia;o__Synergistales;f__Dethiosulfovibrionaceae;g__TG5	7	0	0	1	0	0	0	0	0	0	1475	0	0	0	0	0	0	1	0	0	0	0	1	0	0	0	1	0	0	0	0	0	0	0	0	0	0	0	0	0	1	1487		1	0	0	1	0	0
k__Bacteria;p__Firmicutes;c__Clostridia;o__Clostridiales;f__[Tissierellaceae];g__	0	0	1	0	0	0	0	1	0	0	1472	0	0	0	0	0	0	0	0	0	0	0	0	0	0	0	0	0	0	0	0	0	0	0	0	0	0	2	0	0	0	1476		0	0	1	0	0	0
k__Bacteria;p__Firmicutes;c__Bacilli;o__Lactobacillales;f__Streptococcaceae;g__	5	1	2	0	1	1	0	0	0	0	8	8	3	0	1	4	3	0	1	1	2	122	43	47	42	11	19	32	27	13	52	237	211	44	79	28	20	15	51	21	77	1232		1	1	1	0	1	1
k__Bacteria;p__Fusobacteria;c__Fusobacteriia;o__Fusobacteriales;f__Leptotrichiaceae;g__	0	0	0	0	0	0	0	0	0	0	1001	0	0	0	2	1	0	0	0	0	0	0	1	0	0	1	0	0	0	0	0	0	0	0	0	0	0	0	0	0	0	1006		0	0	0	0	0	0
k__Bacteria;p__Firmicutes;c__Clostridia;o__Clostridiales;f__Peptostreptococcaceae;g__	7	0	1	0	0	0	0	0	0	0	837	0	0	0	0	0	0	0	0	0	0	1	0	1	0	0	1	0	0	0	1	0	1	0	0	0	0	0	0	0	0	850		1	0	1	0	0	0
k__Bacteria;p__Proteobacteria;c__Deltaproteobacteria;o__Desulfobacterales;f__Desulfobulbaceae;g__Desulfobulbus	0	0	0	0	0	0	0	0	0	0	843	0	0	0	0	0	0	0	0	0	0	0	0	1	0	0	0	0	0	0	0	0	0	0	0	0	0	0	0	0	0	844		0	0	0	0	0	0
k__Bacteria;p__Firmicutes;c__Erysipelotrichi;o__Erysipelotrichales;f__Erysipelotrichaceae;g__Bulleidia	12	2	17	6	12	92	22	69	39	23	68	8	1	331	0	127	0	0	0	0	0	0	0	1	0	0	0	0	0	2	0	0	0	0	2	0	1	1	1	1	0	838		1	1	1	1	1	1
k__Bacteria;p__Bacteroidetes;c__Bacteroidia;o__Bacteroidales;f__Porphyromonadaceae;g__Paludibacter	1	0	0	0	0	1	0	0	0	0	781	0	0	0	0	0	0	0	0	0	0	1	0	0	1	0	1	0	0	0	0	0	0	1	0	1	1	0	0	0	0	789		1	0	0	0	0	1
k__Bacteria;p__Firmicutes;c__Clostridia;o__Clostridiales;f__[Mogibacteriaceae];g__Mogibacterium	0	1	10	1	2	0	1	1	0	0	711	1	0	0	0	5	9	1	0	0	0	0	0	0	0	0	0	1	0	1	0	0	0	0	0	0	0	1	0	1	0	747		0	1	1	1	1	0
k__Bacteria;p__Firmicutes;c__Clostridia;o__Clostridiales;f__[Acidaminobacteraceae];g__	0	0	0	0	0	0	0	0	0	1	582	0	0	0	0	0	0	0	0	0	0	0	0	0	0	0	0	0	0	0	0	0	0	1	0	0	0	1	0	0	0	585		0	0	0	0	0	0
k__Bacteria;p__Proteobacteria;c__Gammaproteobacteria;o__Pasteurellales;f__Pasteurellaceae;g__Haemophilus	220	3	3	7	7	8	3	0	6	0	3	2	0	0	2	0	0	1	0	0	0	16	198	0	0	0	0	2	1	4	4	6	13	3	4	0	2	11	5	3	0	537		1	1	1	1	1	1
k__Bacteria;p__Actinobacteria;c__Actinobacteria;o__Actinomycetales;f__Actinomycetaceae;g__Actinomyces	10	2	0	2	0	0	0	1	0	1	60	0	2	1	1	2	15	4	44	0	1	23	25	35	10	5	4	6	6	8	1	33	96	24	6	7	8	8	14	26	9	500		1	1	0	1	0	0
k__Bacteria;p__Actinobacteria;c__Actinobacteria;o__Actinomycetales;f__Micrococcaceae;g__Rothia	5	8	1	7	4	4	0	2	8	1	58	18	23	2	11	1	2	2	2	1	0	15	3	7	5	14	7	20	2	7	10	6	7	2	2	4	5	11	10	6	2	305		1	1	1	1	1	1
k__Bacteria;p__Firmicutes;c__Clostridia;o__Clostridiales;f__Clostridiaceae;g__	39	4	17	8	10	24	26	8	15	5	0	22	14	3	47	27	0	0	0	0	0	0	0	0	0	0	0	0	0	0	0	0	0	0	0	0	0	0	0	0	0	269		1	1	1	1	1	1
k__Bacteria;p__Firmicutes;c__Clostridia;o__Clostridiales;f__;g__	0	0	0	0	0	0	0	0	0	0	250	0	0	0	0	0	0	0	0	0	1	0	1	1	0	0	1	0	0	0	0	0	0	2	1	2	0	0	0	2	3	264		0	0	0	0	0	0
k__Bacteria;p__Firmicutes;c__Clostridia;o__Clostridiales;f__Lachnospiraceae;g__Catonella	20	6	0	1	7	40	0	0	0	0	45	13	41	1	34	11	0	0	0	0	0	0	0	0	0	0	0	0	0	0	0	0	2	3	0	0	1	0	0	0	1	226		1	1	0	1	1	1
k__Bacteria;p__Bacteroidetes;c__Bacteroidia;o__Bacteroidales;f__[Paraprevotellaceae];g__[Prevotella]	84	1	3	0	0	1	3	1	0	0	3	15	47	3	28	4	0	0	1	0	0	0	0	3	2	0	5	1	0	1	4	0	2	5	0	1	0	0	0	0	1	219		1	1	1	0	0	1
k__Bacteria;p__Fusobacteria;c__Fusobacteriia;o__Fusobacteriales;f__Leptotrichiaceae;g__Leptotrichia	0	1	6	3	2	2	2	0	2	2	30	8	5	10	6	1	2	1	1	0	1	22	9	7	2	3	2	8	16	5	6	6	6	1	12	4	12	0	1	4	6	217		0	1	1	1	1	1
k__Bacteria;p__Firmicutes;c__Clostridia;o__Clostridiales;f__Peptococcaceae;g__Peptococcus	0	0	0	0	0	0	0	0	0	0	205	0	0	0	0	0	0	0	0	0	0	0	0	0	0	0	0	0	0	0	0	0	0	0	0	0	0	0	0	0	0	205		0	0	0	0	0	0
k__Bacteria;p__Firmicutes;c__Bacilli;o__Lactobacillales;f__Lactobacillaceae;g__Lactobacillus	0	0	0	2	0	3	2	4	0	0	0	4	53	13	31	6	16	15	6	18	26	1	0	0	0	0	0	0	0	0	0	0	0	1	0	0	0	0	1	0	0	202		0	0	0	1	0	1
k__Bacteria;p__Firmicutes;c__Bacilli;o__Gemellales;f__Gemellaceae;g__Gemella	2	4	1	0	4	1	0	0	0	0	158	1	0	0	6	0	0	0	0	0	0	0	3	3	1	0	1	6	0	1	0	0	3	1	1	0	0	0	1	0	0	198		1	1	1	0	1	1
k__Bacteria;p__Firmicutes;c__Bacilli;o__Gemellales;f__Gemellaceae;g__	5	2	0	1	0	0	0	0	0	0	145	0	0	1	1	0	0	0	0	0	0	3	0	0	0	0	0	2	0	2	0	0	0	0	0	1	0	0	1	0	0	164		1	1	0	1	0	0
k__Bacteria;p__Proteobacteria;c__Deltaproteobacteria;o__Desulfovibrionales;f__Desulfomicrobiaceae;g__Desulfomicrobium	0	0	0	0	0	0	0	0	0	0	149	0	0	0	0	0	0	0	0	0	0	0	0	0	0	0	0	0	0	0	0	0	0	0	0	0	0	0	0	0	0	149		0	0	0	0	0	0
k__Bacteria;p__TM7;c__TM7-3;o__CW040;f__F16;g__	0	0	0	0	0	0	0	0	0	0	0	17	56	3	70	2	0	0	0	0	0	0	0	0	0	0	0	0	0	0	0	0	0	0	0	0	0	0	0	0	0	148		0	0	0	0	0	0
k__Bacteria;p__Proteobacteria;c__Betaproteobacteria;o__Neisseriales;f__Neisseriaceae;g__Neisseria	2	4	4	4	2	4	3	1	7	0	0	2	0	2	2	0	0	0	0	0	0	10	2	2	4	0	2	5	0	15	2	0	4	2	1	1	5	28	9	0	2	131		1	1	1	1	1	1
k__Bacteria;p__Bacteroidetes;c__Bacteroidia;o__Bacteroidales;f__;g__	1	0	1	3	0	1	1	0	1	0	77	0	0	0	1	0	0	0	0	1	0	0	1	0	3	0	0	3	1	1	0	0	1	1	1	0	0	1	0	0	0	100		1	0	1	1	0	1
k__Bacteria;p__Proteobacteria;c__Gammaproteobacteria;o__Pasteurellales;f__Pasteurellaceae;g__Aggregatibacter	26	0	0	0	0	0	0	0	0	0	55	0	1	0	1	0	0	0	0	0	0	0	0	0	1	0	1	1	0	0	0	1	0	0	0	1	0	0	0	1	1	90		1	0	0	0	0	0
k__Bacteria;p__Proteobacteria;c__Betaproteobacteria;o__Neisseriales;f__Neisseriaceae;g__Eikenella	1	0	0	0	0	0	0	0	0	0	75	0	0	0	0	0	0	0	0	0	0	0	0	0	0	0	0	0	0	0	0	1	10	1	0	0	0	0	0	0	0	88		1	0	0	0	0	0
k__Bacteria;p__Tenericutes;c__Mollicutes;o__Acholeplasmatales;f__Acholeplasmataceae;g__Acholeplasma	0	0	0	0	0	0	0	0	0	0	75	0	0	0	0	0	0	0	0	0	0	0	0	0	0	0	0	0	0	0	0	0	0	0	0	0	0	0	0	0	0	75		0	0	0	0	0	0
k__Bacteria;p__Actinobacteria;c__Actinobacteria;o__Bifidobacteriales;f__Bifidobacteriaceae;g__Bifidobacterium	2	0	1	0	0	29	6	0	0	0	0	25	0	0	0	3	1	0	0	1	1	0	0	0	0	0	0	0	0	0	0	0	0	0	0	0	1	0	0	0	0	70		1	0	1	0	0	1
k__Bacteria;p__TM7;c__TM7-3;o__;f__;g__	8	0	1	2	0	0	0	0	0	0	30	0	0	0	0	0	0	1	0	0	0	15	0	1	0	1	0	0	0	0	0	0	0	0	1	2	1	1	3	0	2	69		1	0	1	1	0	0
k__Bacteria;p__Actinobacteria;c__Coriobacteriia;o__Coriobacteriales;f__Coriobacteriaceae;g__Slackia	1	1	4	0	0	3	1	3	0	0	1	0	0	0	0	0	0	0	2	1	0	0	0	3	2	2	2	3	3	1	4	5	6	3	3	3	4	1	1	4	1	68		1	1	1	0	0	1
k__Bacteria;p__Tenericutes;c__Mollicutes;o__Mycoplasmatales;f__Mycoplasmataceae;g__Mycoplasma	1	0	0	0	0	0	0	0	0	0	57	0	0	0	0	0	0	0	0	0	0	0	0	0	0	0	0	0	1	0	0	0	1	0	0	0	0	0	0	0	0	60		1	0	0	0	0	0
k__Bacteria;p__Proteobacteria;c__Gammaproteobacteria;o__Enterobacteriales;f__Enterobacteriaceae;g__	2	1	2	1	0	0	1	5	1	0	0	1	0	1	0	2	3	1	0	2	1	1	1	1	3	0	0	0	1	0	3	3	2	2	1	3	2	4	1	3	4	59		1	1	1	1	0	0
k__Bacteria;p__Actinobacteria;c__Actinobacteria;o__Actinomycetales;f__Corynebacteriaceae;g__Corynebacterium	0	1	0	0	0	0	0	0	0	0	5	0	1	0	0	5	9	6	1	15	10	1	0	0	0	0	0	1	0	0	0	2	0	0	0	0	0	0	0	0	0	57		0	1	0	0	0	0
k__Bacteria;p__Bacteroidetes;c__Bacteroidia;o__Bacteroidales;f__[Odoribacteraceae];g__Odoribacter	0	0	0	0	0	0	0	0	0	0	47	0	0	0	0	0	0	0	0	0	0	0	0	0	0	0	0	0	0	0	0	0	0	0	0	0	0	0	0	0	0	47		0	0	0	0	0	0
k__Bacteria;p__Firmicutes;c__Clostridia;o__Clostridiales;f__Veillonellaceae;g__Schwartzia	0	0	0	0	0	0	0	0	0	0	37	5	0	0	0	0	0	1	0	0	0	0	0	0	0	0	1	0	0	0	0	0	0	0	0	0	0	1	0	0	0	45		0	0	0	0	0	0
k__Bacteria;p__Actinobacteria;c__Coriobacteriia;o__Coriobacteriales;f__Coriobacteriaceae;g__	4	0	0	1	2	4	19	1	2	2	0	1	0	0	0	0	0	2	0	0	0	0	0	0	0	0	1	0	0	0	0	0	0	1	1	0	0	0	0	0	0	41		1	0	0	1	1	1
k__Bacteria;p__Firmicutes;c__Clostridia;o__Clostridiales;f__Clostridiaceae;g__Clostridium	1	4	2	1	0	7	6	2	0	7	9	0	0	0	0	0	0	0	0	0	0	0	0	0	0	0	0	0	0	0	0	0	0	0	0	0	0	0	0	0	0	39		1	1	1	1	0	1
k__Bacteria;p__Firmicutes;c__Clostridia;o__Clostridiales;f__Eubacteriaceae;g__Pseudoramibacter_Eubacterium	0	2	2	0	2	0	0	0	0	0	28	0	0	0	0	0	0	0	0	1	0	0	0	0	1	0	0	1	0	0	1	0	0	0	0	0	0	1	0	0	0	39		0	1	1	0	1	0
k__Bacteria;p__Proteobacteria;c__Alphaproteobacteria;o__Sphingomonadales;f__Sphingomonadaceae;g__Sphingomonas	0	1	1	2	0	0	0	0	1	2	1	0	1	2	0	0	0	2	1	0	2	0	1	2	0	1	2	0	1	0	1	1	2	1	0	0	0	0	0	0	5	33		0	1	1	1	0	0
k__Bacteria;p__Proteobacteria;c__Gammaproteobacteria;o__Enterobacteriales;f__Enterobacteriaceae;g__Proteus	0	0	0	0	0	0	1	0	3	1	0	1	2	1	1	0	0	1	2	1	1	1	0	0	0	0	2	0	0	1	1	0	0	1	0	0	1	3	2	0	2	29		0	0	0	0	0	0
k__Bacteria;p__Proteobacteria;c__Betaproteobacteria;o__Neisseriales;f__Neisseriaceae;g__	0	2	0	0	2	0	0	0	0	0	6	0	1	0	0	2	0	1	0	0	0	0	0	0	0	0	1	0	1	1	0	0	1	0	0	0	0	0	3	0	2	23		0	1	0	0	1	0
k__Bacteria;p__Chloroflexi;c__Anaerolineae;o__Anaerolineales;f__Anaerolinaceae;g__SHD-231	0	0	0	0	0	0	0	0	0	0	19	0	0	0	0	0	0	0	0	0	0	0	0	0	0	0	0	0	0	0	0	0	0	0	0	0	0	0	0	0	0	19		0	0	0	0	0	0
k__Bacteria;p__Proteobacteria;c__Betaproteobacteria;o__Burkholderiales;f__Burkholderiaceae;g__Lautropia	0	0	0	0	0	0	0	0	0	0	0	0	2	0	0	0	0	0	0	0	0	6	0	0	0	0	0	0	0	0	0	1	6	0	0	0	0	0	0	0	2	17		0	0	0	0	0	0
k__Bacteria;p__Proteobacteria;c__Gammaproteobacteria;o__Pasteurellales;f__Pasteurellaceae;g__Actinobacillus	0	0	1	6	0	1	0	0	1	0	0	0	0	0	0	0	0	0	0	0	0	0	1	0	3	0	1	0	0	0	0	0	1	0	0	0	0	0	0	1	0	16		0	0	1	1	0	1
k__Bacteria;p__Bacteroidetes;c__Flavobacteriia;o__Flavobacteriales;f__[Weeksellaceae];g__	0	0	0	0	0	0	0	0	1	0	3	0	0	0	0	0	0	0	0	0	0	2	0	0	2	0	0	0	0	0	0	0	1	0	2	0	0	0	0	0	0	11		0	0	0	0	0	0
k__Bacteria;p__Firmicutes;c__Bacilli;o__Lactobacillales;f__Enterococcaceae;g__	0	0	0	0	0	0	0	0	0	0	0	1	1	0	0	0	4	1	1	2	0	0	0	0	0	0	0	0	0	0	0	0	0	0	0	0	0	0	0	0	0	10		0	0	0	0	0	0
k__Bacteria;p__Proteobacteria;c__Alphaproteobacteria;o__Rhizobiales;f__Phyllobacteriaceae;g__	0	0	0	0	0	0	0	0	0	0	0	0	1	0	0	0	0	0	0	0	1	1	0	0	0	0	1	0	0	0	3	0	0	0	0	0	1	0	0	2	0	10		0	0	0	0	0	0
k__Bacteria;p__Bacteroidetes;c__Bacteroidia;o__Bacteroidales;f__p-2534-18B5;g__BE24	0	0	0	0	0	0	0	0	0	0	9	0	0	0	0	0	0	0	0	0	0	0	0	0	0	0	0	0	0	0	0	0	0	0	0	0	0	0	0	0	0	9		0	0	0	0	0	0
k__Bacteria;p__Proteobacteria;c__Gammaproteobacteria;o__Pseudomonadales;f__Moraxellaceae;g__Moraxella	0	0	0	0	1	0	0	0	0	0	1	0	0	0	0	0	0	0	0	1	0	0	0	0	0	0	0	0	0	0	0	0	0	0	0	1	0	2	1	0	1	8		0	0	0	0	1	0
k__Bacteria;p__Cyanobacteria;c__Oscillatoriophycideae;o__Chroococcales;f__Xenococcaceae;g__	0	0	0	1	0	0	0	0	0	0	0	0	0	0	0	0	0	0	0	1	1	0	0	0	1	0	0	0	0	0	0	0	0	0	2	0	0	0	0	1	0	7		0	0	0	1	0	0
k__Bacteria;p__Proteobacteria;c__Gammaproteobacteria;o__Enterobacteriales;f__Enterobacteriaceae;g__Klebsiella	1	0	0	0	0	0	0	0	0	1	0	0	1	0	0	0	0	0	0	0	0	0	0	0	0	1	0	0	1	0	0	1	0	0	1	0	0	0	0	0	0	7		1	0	0	0	0	0
k__Bacteria;p__Cyanobacteria;c__Chloroplast;o__Streptophyta;f__;g__	0	0	0	0	0	0	0	0	0	0	0	0	0	0	2	0	0	0	0	0	0	4	0	0	0	0	0	0	0	0	0	0	0	0	0	0	0	0	0	0	0	6		0	0	0	0	0	0
k__Bacteria;p__Proteobacteria;c__Gammaproteobacteria;o__Xanthomonadales;f__Xanthomonadaceae;g__	0	0	0	0	0	0	1	0	0	0	0	0	1	1	0	0	0	0	0	0	0	0	0	0	1	0	0	0	0	1	0	0	0	0	0	0	1	0	0	0	0	6		0	0	0	0	0	0
k__Bacteria;p__SR1;c__;o__;f__;g__	0	0	2	0	0	0	1	0	0	0	1	0	0	0	0	0	0	0	0	0	0	0	0	0	2	0	0	0	0	0	0	0	0	0	0	0	0	0	0	0	0	6		0	0	1	0	0	0
k__Bacteria;p__Proteobacteria;c__Gammaproteobacteria;o__Cardiobacteriales;f__Cardiobacteriaceae;g__Cardiobacterium	1	2	0	0	0	0	0	0	0	0	0	0	0	0	0	0	0	0	0	0	0	0	0	0	0	2	0	0	0	0	0	0	0	0	0	0	0	0	0	0	0	5		1	1	0	0	0	0
k__Bacteria;p__Synergistetes;c__Synergistia;o__Synergistales;f__Dethiosulfovibrionaceae;g__Pyramidobacter	0	0	2	0	0	0	1	0	0	0	0	0	0	0	0	0	0	0	0	0	0	0	0	0	0	0	0	0	0	0	0	0	0	0	0	1	0	0	0	0	1	5		0	0	1	0	0	0
k__Bacteria;p__Actinobacteria;c__Actinobacteria;o__Actinomycetales;f__Propionibacteriaceae;g__	0	0	0	0	0	0	0	0	0	0	0	0	0	0	0	0	0	0	4	0	0	0	0	0	0	0	0	0	0	0	0	0	0	0	0	0	0	0	0	0	0	4		0	0	0	0	0	0
k__Bacteria;p__Actinobacteria;c__Actinobacteria;o__Bifidobacteriales;f__Bifidobacteriaceae;g__Alloscardovia	4	0	0	0	0	0	0	0	0	0	0	0	0	0	0	0	0	0	0	0	0	0	0	0	0	0	0	0	0	0	0	0	0	0	0	0	0	0	0	0	0	4		1	0	0	0	0	0
k__Bacteria;p__Bacteroidetes;c__Flavobacteriia;o__Flavobacteriales;f__[Weeksellaceae];g__Chryseobacterium	0	0	1	0	0	0	0	0	0	0	0	0	0	0	0	0	0	1	0	0	0	0	0	0	0	1	0	0	0	0	0	0	0	0	0	0	0	0	0	0	0	3		0	0	1	0	0	0
k__Bacteria;p__Firmicutes;c__Bacilli;o__Bacillales;f__Staphylococcaceae;g__Staphylococcus	0	0	0	0	0	1	0	0	0	0	0	0	0	0	0	0	0	0	0	0	0	0	0	1	0	0	0	0	0	0	0	0	0	0	0	0	0	0	1	0	0	3		0	0	0	0	0	1
k__Bacteria;p__Firmicutes;c__Clostridia;o__Clostridiales;f__[Tissierellaceae];g__ph2	1	0	1	0	1	0	0	0	0	0	0	0	0	0	0	0	0	0	0	0	0	0	0	0	0	0	0	0	0	0	0	0	0	0	0	0	0	0	0	0	0	3		1	0	1	0	1	0
k__Bacteria;p__Proteobacteria;c__Betaproteobacteria;o__Burkholderiales;f__Comamonadaceae;g__	0	0	0	0	0	0	0	0	0	0	0	0	0	0	0	0	0	0	3	0	0	0	0	0	0	0	0	0	0	0	0	0	0	0	0	0	0	0	0	0	0	3		0	0	0	0	0	0
k__Bacteria;p__Proteobacteria;c__Deltaproteobacteria;o__Desulfovibrionales;f__Desulfovibrionaceae;g__Desulfovibrio	0	0	0	0	0	0	0	0	1	0	0	0	0	0	1	0	0	0	0	0	0	0	0	0	0	0	0	0	0	0	0	0	0	0	0	0	0	0	0	1	0	3		0	0	0	0	0	0
k__Bacteria;p__Proteobacteria;c__Gammaproteobacteria;o__Pseudomonadales;f__Pseudomonadaceae;g__Pseudomonas	0	0	1	0	0	0	0	0	0	0	0	0	0	0	0	0	0	0	0	0	0	0	0	0	0	0	0	0	0	1	0	0	0	1	0	0	0	0	0	0	0	3		0	0	1	0	0	0
k__Bacteria;p__Actinobacteria;c__Actinobacteria;o__Actinomycetales;f__Micrococcaceae;g__Micrococcus	0	0	0	0	0	0	0	0	0	0	0	0	0	0	0	0	0	0	2	0	0	0	0	0	0	0	0	0	0	0	0	0	0	0	0	0	0	0	0	0	0	2		0	0	0	0	0	0
k__Bacteria;p__Chloroflexi;c__Anaerolineae;o__Caldilineales;f__Caldilineaceae;g__	0	0	0	0	0	0	0	0	0	0	0	0	0	0	0	0	0	1	0	0	0	0	0	0	0	0	0	0	0	0	1	0	0	0	0	0	0	0	0	0	0	2		0	0	0	0	0	0
k__Bacteria;p__TM7;c__TM7-3;o__I025;f__Rs-045;g__	0	0	0	0	0	0	0	0	0	0	0	0	0	0	1	0	0	0	0	0	0	0	0	0	0	0	0	1	0	0	0	0	0	0	0	0	0	0	0	0	0	2		0	0	0	0	0	0
k__Bacteria;p__Tenericutes;c__RF3;o__ML615J-28;f__;g__	0	0	0	0	0	0	0	0	0	0	2	0	0	0	0	0	0	0	0	0	0	0	0	0	0	0	0	0	0	0	0	0	0	0	0	0	0	0	0	0	0	2		0	0	0	0	0	0
k__Bacteria;p__Actinobacteria;c__Actinobacteria;o__Actinomycetales;f__Actinomycetaceae;g__	0	0	0	0	0	0	0	0	0	0	0	0	0	0	0	0	0	0	1	0	0	0	0	0	0	0	0	0	0	0	0	0	0	0	0	0	0	0	0	0	0	1		0	0	0	0	0	0
k__Bacteria;p__Actinobacteria;c__Actinobacteria;o__Actinomycetales;f__Actinomycetaceae;g__Mobiluncus	0	0	0	0	0	0	0	0	0	0	0	0	0	0	0	0	0	0	0	0	0	1	0	0	0	0	0	0	0	0	0	0	0	0	0	0	0	0	0	0	0	1		0	0	0	0	0	0
k__Bacteria;p__Actinobacteria;c__Actinobacteria;o__Actinomycetales;f__Intrasporangiaceae;g__Janibacter	0	0	0	0	0	0	0	0	0	0	0	0	0	0	0	0	1	0	0	0	0	0	0	0	0	0	0	0	0	0	0	0	0	0	0	0	0	0	0	0	0	1		0	0	0	0	0	0
k__Bacteria;p__Actinobacteria;c__Actinobacteria;o__Actinomycetales;f__Micrococcaceae;g__	0	0	0	0	0	0	0	0	0	0	0	0	0	0	0	0	0	0	0	0	0	0	0	0	0	0	0	0	0	0	0	0	0	0	0	0	0	0	0	0	1	1		0	0	0	0	0	0
k__Bacteria;p__Actinobacteria;c__Actinobacteria;o__Actinomycetales;f__Mycobacteriaceae;g__Mycobacterium	0	0	0	0	0	0	0	0	0	0	0	0	0	0	0	0	0	0	1	0	0	0	0	0	0	0	0	0	0	0	0	0	0	0	0	0	0	0	0	0	0	1		0	0	0	0	0	0
k__Bacteria;p__Bacteroidetes;c__Bacteroidia;o__Bacteroidales;f__BS11;g__	0	0	0	0	0	0	0	0	0	0	0	0	0	0	1	0	0	0	0	0	0	0	0	0	0	0	0	0	0	0	0	0	0	0	0	0	0	0	0	0	0	1		0	0	0	0	0	0
k__Bacteria;p__Bacteroidetes;c__[Saprospirae];o__[Saprospirales];f__Chitinophagaceae;g__Sediminibacterium	0	0	0	0	0	0	0	0	0	0	0	0	0	0	0	0	0	0	0	0	0	0	0	1	0	0	0	0	0	0	0	0	0	0	0	0	0	0	0	0	0	1		0	0	0	0	0	0
k__Bacteria;p__Firmicutes;c__Clostridia;o__Clostridiales;f__Lachnospiraceae;g__Shuttleworthia	0	0	0	0	0	0	0	0	0	0	0	0	0	0	0	0	0	1	0	0	0	0	0	0	0	0	0	0	0	0	0	0	0	0	0	0	0	0	0	0	0	1		0	0	0	0	0	0
k__Bacteria;p__Firmicutes;c__Clostridia;o__Clostridiales;f__Veillonellaceae;g__	0	0	0	0	0	0	0	0	0	0	0	0	0	0	1	0	0	0	0	0	0	0	0	0	0	0	0	0	0	0	0	0	0	0	0	0	0	0	0	0	0	1		0	0	0	0	0	0
k__Bacteria;p__Firmicutes;c__Clostridia;o__Clostridiales;f__[Tissierellaceae];g__Finegoldia	0	0	0	0	0	0	0	0	0	0	0	0	0	0	0	0	0	0	0	0	1	0	0	0	0	0	0	0	0	0	0	0	0	0	0	0	0	0	0	0	0	1		0	0	0	0	0	0
k__Bacteria;p__Firmicutes;c__Erysipelotrichi;o__Erysipelotrichales;f__Erysipelotrichaceae;g__Sharpea	0	0	0	0	0	0	1	0	0	0	0	0	0	0	0	0	0	0	0	0	0	0	0	0	0	0	0	0	0	0	0	0	0	0	0	0	0	0	0	0	0	1		0	0	0	0	0	0
k__Bacteria;p__Proteobacteria;c__Alphaproteobacteria;o__Rhizobiales;f__Bradyrhizobiaceae;g__Bradyrhizobium	0	0	0	0	0	1	0	0	0	0	0	0	0	0	0	0	0	0	0	0	0	0	0	0	0	0	0	0	0	0	0	0	0	0	0	0	0	0	0	0	0	1		0	0	0	0	0	1
k__Bacteria;p__Proteobacteria;c__Betaproteobacteria;o__Neisseriales;f__Neisseriaceae;g__Kingella	0	0	0	0	0	0	0	0	0	0	1	0	0	0	0	0	0	0	0	0	0	0	0	0	0	0	0	0	0	0	0	0	0	0	0	0	0	0	0	0	0	1		0	0	0	0	0	0
k__Bacteria;p__Proteobacteria;c__Epsilonproteobacteria;o__Campylobacterales;f__Helicobacteraceae;g__Wolinella	0	0	0	0	0	0	0	0	0	0	1	0	0	0	0	0	0	0	0	0	0	0	0	0	0	0	0	0	0	0	0	0	0	0	0	0	0	0	0	0	0	1		0	0	0	0	0	0
k__Bacteria;p__Proteobacteria;c__Gammaproteobacteria;o__Pseudomonadales;f__Moraxellaceae;g__Acinetobacter	0	0	0	0	0	0	1	0	0	0	0	0	0	0	0	0	0	0	0	0	0	0	0	0	0	0	0	0	0	0	0	0	0	0	0	0	0	0	0	0	0	1		0	0	0	0	0	0
k__Bacteria;p__Proteobacteria;c__Gammaproteobacteria;o__Xanthomonadales;f__Xanthomonadaceae;g__Stenotrophomonas	0	0	0	0	0	0	0	0	0	0	0	0	0	0	0	0	0	0	0	0	0	0	0	0	0	0	0	1	0	0	0	0	0	0	0	0	0	0	0	0	0	1		0	0	0	0	0	0
k__Bacteria;p__TM7;c__TM7-3;o__CW040;f__;g__	0	0	0	0	0	0	0	0	0	0	1	0	0	0	0	0	0	0	0	0	0	0	0	0	0	0	0	0	0	0	0	0	0	0	0	0	0	0	0	0	0	1		0	0	0	0	0	0
Sum	75308	43841	63427	54807	48727	56693	64040	69340	89000	47575	53387	36035	76079	81278	80120	64085	71315	86891	71708	76893	60084	123221	90809	94976	92569	67799	61861	79566	104659	106985	110215	94244	83234	88495	106634	108625	110297	86026	68203	86782	90198	3226031		50	42	48	39	34	38
[truncated: 35 more columns]

## Sheet: otu_table_L7
# Constructed from biom file	Abundance																																											Prevalence
#OTU ID	DB2G1	DB2G2	DB2G3	DB2G4	DB2G5	DB2G6	DB2G7	DB2G8	DB2G9	DB2G10	DB3G0	DB3G1	DB3G2	DB3G3	DB3G4	DB3G5	DB3G6	DB3G7	DB3G8	DB3G9	DB3G10	HB1G1	HB1G2	HB1G3	HB1G4	HB1G5	HB1G6	HB1G7	HB1G8	HB1G9	HB1G10	HB2G1	HB2G2	HB2G3	HB2G4	HB2G5	HB2G6	HB2G7	HB2G8	HB2G9	HB2G10	Sum		DB2G1	DB2G2	DB2G3	DB2G4	DB2G5	DB2G6
k__Bacteria;p__Fusobacteria;c__Fusobacteriia;o__Fusobacteriales;f__Fusobacteriaceae;g__Fusobacterium;s__	37508	12076	9472	17435	8192	20519	35329	29180	43093	17089	20660	19831	45927	53209	39768	39844	45902	47154	39629	30176	28973	1244	50303	59280	49652	34782	35121	49752	74736	73072	75733	334	42923	61074	76540	85001	84867	58424	38202	37796	45609	1675411		1	1	1	1	1	1
k__Bacteria;p__Firmicutes;c__Clostridia;o__Clostridiales;f__Veillonellaceae;g__Veillonella;s__dispar	15818	12739	20892	13661	15049	13116	6880	9168	14421	8351	26	5298	8224	11347	6445	10619	7064	11520	10301	26228	7729	92839	35541	29628	33530	25002	20975	13777	14239	17302	19283	50519	13503	8708	14294	13181	13635	9853	13590	13126	11193	698614		1	1	1	1	1	1
k__Bacteria;p__Firmicutes;c__Bacilli;o__Lactobacillales;f__Streptococcaceae;g__Streptococcus;s__	2688	3140	4301	8528	6640	3144	4174	1788	842	1335	4145	1035	950	2935	1287	2386	374	68	349	668	432	17321	1106	1935	3927	3845	1952	10000	4944	6407	8164	41305	20424	12113	3092	1816	3057	10384	6245	25312	25376	259934		1	1	1	1	1	1
k__Bacteria;p__Firmicutes;c__Clostridia;o__Clostridiales;f__Veillonellaceae;g__Megasphaera;s__	9095	4291	7221	4017	5750	10732	7053	19771	18409	12508	3	812	7339	560	4431	2364	3911	16233	12694	12358	13254	2	3	1	1	0	1	2	1	0	0	1	2	0	5	1	1	2	1	1	1	172832		1	1	1	1	1	1
k__Bacteria;p__Firmicutes;c__Clostridia;o__Clostridiales;f__Lachnospiraceae;g__Oribacterium;s__	2519	6556	6779	2098	4519	3779	4803	2368	4640	2306	0	195	1636	1212	2788	1846	1332	1278	2728	1294	2742	4	642	1439	1893	1107	1289	1367	4608	3687	1794	22	3034	2364	4082	1686	4478	1422	2358	2226	814	97734		1	1	1	1	1	1
k__Bacteria;p__Bacteroidetes;c__Bacteroidia;o__Bacteroidales;f__Prevotellaceae;g__Prevotella;s__	2045	2475	5701	3388	3123	1683	2924	3911	4165	2373	379	3039	5749	2182	6925	1972	1788	4938	2279	1428	1779	9	7	5	4	10	4	5	7	0	6	3	2	6	5	5	5	4	5	1	10	64349		1	1	1	1	1	1
k__Bacteria;p__Proteobacteria;c__Epsilonproteobacteria;o__Campylobacterales;f__Campylobacteraceae;g__Campylobacter;s__	717	508	801	377	198	164	530	300	259	286	253	195	427	5933	3459	1909	3723	2174	1097	1715	1660	3539	294	158	169	49	48	1422	1954	2772	658	2	3	7	368	302	314	1878	912	2176	2474	46184		1	1	1	1	1	1
k__Bacteria;p__Actinobacteria;c__Coriobacteriia;o__Coriobacteriales;f__Coriobacteriaceae;g__Atopobium;s__	118	23	76	57	33	15	96	99	119	119	16	240	401	108	46	229	122	229	163	160	269	0	5	792	1691	1429	1150	1199	2394	2596	3000	178	382	2691	2702	3126	1777	1016	3898	2144	1594	36502		1	1	1	1	1	1
k__Bacteria;p__Bacteroidetes;c__Bacteroidia;o__Bacteroidales;f__Prevotellaceae;g__Prevotella;s__melaninogenica	114	19	272	151	57	12	13	10	15	7	14	2247	1227	34	10417	21	0	2	1	0	0	6138	1561	513	347	118	385	565	258	157	361	41	3	33	1148	392	213	363	922	1177	1160	30488		1	1	1	1	1	1
k__Bacteria;p__Firmicutes;c__Clostridia;o__Clostridiales;f__Veillonellaceae;g__Dialister;s__	903	482	1747	1499	914	438	566	849	755	737	7	828	910	774	1779	1152	998	1520	792	484	575	0	2	0	5	2	19	25	7	16	28	1	5	52	132	84	89	79	14	32	28	19329		1	1	1	1	1	1
k__Bacteria;p__Firmicutes;c__Clostridia;o__Clostridiales;f__[Tissierellaceae];g__Parvimonas;s__	110	21	4	4	69	133	29	2	1	2	4793	111	6	5	44	12	134	15	96	95	3	3	0	7	214	796	238	787	641	283	188	1	179	195	1417	2041	896	1753	865	1546	919	18658		1	1	1	1	1	1
k__Bacteria;p__Bacteroidetes;c__Bacteroidia;o__Bacteroidales;f__Bacteroidaceae;g__Bacteroides;s__	355	746	4660	2555	2980	1694	212	484	1192	1543	11	1	0	0	0	0	0	0	0	0	0	0	0	0	0	0	0	0	0	0	0	0	0	0	0	0	0	0	0	0	1	16434		1	1	1	1	1	1
k__Bacteria;p__Firmicutes;c__Clostridia;o__Clostridiales;f__Lachnospiraceae;g__;s__	41	8	8	4	5	9	24	6	25	3	457	410	211	608	166	182	6	42	46	2	18	391	335	138	222	129	69	76	378	243	287	70	1065	446	937	134	467	318	422	674	272	9354		1	1	1	1	1	1
k__Bacteria;p__Firmicutes;c__Clostridia;o__Clostridiales;f__Veillonellaceae;g__Veillonella;s__parvula	280	264	413	302	324	318	167	243	373	225	0	25	64	121	35	132	159	402	318	487	212	421	218	235	226	175	173	105	94	139	117	49	40	25	68	144	83	53	59	81	87	7456		1	1	1	1	1	1
k__Bacteria;p__Firmicutes;c__Bacilli;o__Lactobacillales;f__Enterococcaceae;g__Enterococcus;s__	0	0	0	0	0	0	0	1	1	0	1	51	439	41	266	146	3503	572	556	845	741	0	1	0	0	0	0	0	0	0	0	1	0	0	1	1	0	0	0	0	0	7167		0	0	0	0	0	0
k__Bacteria;p__Firmicutes;c__Bacilli;o__Lactobacillales;f__Enterococcaceae;g__Vagococcus;s__	23	3	1	0	2	0	1	0	1	0	5	42	8	0	1	1	44	33	11	20	2	499	263	383	316	166	190	185	120	94	235	720	693	199	772	287	140	161	279	182	246	6328		1	1	1	0	1	0
k__Bacteria;p__Bacteroidetes;c__Flavobacteriia;o__Flavobacteriales;f__Flavobacteriaceae;g__Capnocytophaga;s__	21	34	108	31	64	20	134	114	92	152	13	53	602	1130	134	378	812	8	218	193	321	1	4	12	16	14	25	67	88	43	53	0	12	334	461	192	79	75	97	47	18	6270		1	1	1	1	1	1
k__Bacteria;p__Firmicutes;c__Clostridia;o__Clostridiales;f__Veillonellaceae;g__Selenomonas;s__	61	126	118	95	62	165	632	815	316	412	14	109	243	518	70	186	565	380	279	370	533	0	0	1	0	0	0	0	3	0	0	1	1	0	0	0	0	4	0	1	0	6080		1	1	1	1	1	1
k__Bacteria;p__Firmicutes;c__Clostridia;o__Clostridiales;f__[Mogibacteriaceae];g__;s__	40	18	59	18	32	26	60	29	36	13	4524	14	8	6	24	26	1	0	0	0	0	0	2	3	0	0	2	1	1	0	0	0	1	0	1	0	1	0	1	1	0	4948		1	1	1	1	1	1
k__Bacteria;p__Firmicutes;c__Bacilli;o__Bacillales;f__Planococcaceae;g__;s__	19	0	2	1	2	0	0	0	0	1	2	32	1	0	0	0	22	21	7	18	3	304	192	248	212	103	116	90	74	73	135	327	331	78	391	143	94	82	126	94	124	3468		1	0	1	1	1	0
k__Bacteria;p__Firmicutes;c__Clostridia;o__Clostridiales;f__Peptostreptococcaceae;g__Peptostreptococcus;s__anaerobius	375	39	162	128	80	187	274	51	102	34	0	348	117	54	971	282	0	0	0	0	0	0	0	2	2	1	0	0	0	0	0	0	1	0	0	1	0	2	3	0	1	3217		1	1	1	1	1	1
k__Bacteria;p__Firmicutes;c__Clostridia;o__Clostridiales;f__Peptostreptococcaceae;g__Filifactor;s__	0	1	0	0	0	0	1	1	0	0	2646	1	0	0	1	0	0	0	0	0	0	0	0	0	0	0	1	0	1	0	0	0	0	0	1	1	0	0	0	0	1	2656		0	1	0	0	0	0
k__Bacteria;p__Firmicutes;c__Clostridia;o__Clostridiales;f__Veillonellaceae;g__Veillonella;s__	98	11	10	7	28	0	2	0	0	2	5	387	880	70	404	48	0	221	15	170	98	1	0	1	0	0	0	0	1	0	1	0	0	0	0	1	0	1	0	0	0	2462		1	1	1	1	1	0
k__Bacteria;p__Firmicutes;c__Clostridia;o__Clostridiales;f__Lachnospiraceae;g__Moryella;s__	148	182	509	383	542	190	27	48	47	29	27	11	71	0	172	15	1	0	1	0	0	0	0	1	0	0	0	0	0	0	1	0	0	0	0	0	0	0	0	0	0	2405		1	1	1	1	1	1
k__Bacteria;p__Bacteroidetes;c__Bacteroidia;o__Bacteroidales;f__Porphyromonadaceae;g__Tannerella;s__	82	11	10	0	0	0	0	0	0	0	1787	0	5	0	0	0	1	0	0	0	0	0	0	1	0	0	0	2	1	0	0	0	0	0	0	0	0	0	0	0	0	1900		1	1	1	0	0	0
k__Bacteria;p__Bacteroidetes;c__Bacteroidia;o__Bacteroidales;f__Porphyromonadaceae;g__Porphyromonas;s__	1615	12	0	0	0	0	1	1	3	1	155	0	0	1	0	0	0	1	1	0	0	3	5	2	3	0	0	0	0	0	0	1	1	3	0	2	0	0	1	0	0	1812		1	1	0	0	0	0
k__Bacteria;p__Firmicutes;c__Bacilli;o__Lactobacillales;f__Carnobacteriaceae;g__Granulicatella;s__	8	0	2	1	0	3	0	1	0	0	68	8	0	1	0	0	1	2	0	3	0	131	35	61	37	26	40	36	34	32	72	349	240	64	94	22	32	51	92	79	140	1765		1	0	1	1	0	1
k__Bacteria;p__Bacteroidetes;c__Bacteroidia;o__Bacteroidales;f__Porphyromonadaceae;g__Porphyromonas;s__endodontalis	0	0	0	0	0	0	0	0	0	0	1642	0	2	0	2	0	0	0	0	0	0	0	0	2	0	0	1	2	0	0	0	0	0	0	0	0	0	0	0	1	2	1654		0	0	0	0	0	0
k__Bacteria;p__Spirochaetes;c__Spirochaetes;o__Spirochaetales;f__Spirochaetaceae;g__Treponema;s__	0	0	2	0	0	0	0	0	0	0	1634	0	0	0	0	0	0	1	0	0	0	0	0	0	0	0	1	0	1	0	1	0	0	0	2	0	0	0	0	2	0	1644		0	0	1	0	0	0
k__Bacteria;p__Firmicutes;c__Bacilli;o__Lactobacillales;f__Streptococcaceae;g__Streptococcus;s__anginosus	11	2	6	3	2	117	3	0	0	0	113	13	13	24	4	118	779	26	51	34	81	125	0	0	0	1	0	0	1	0	2	12	1	0	0	0	0	0	1	0	0	1543		1	1	1	1	1	1
k__Bacteria;p__Synergistetes;c__Synergistia;o__Synergistales;f__Dethiosulfovibrionaceae;g__TG5;s__	7	0	0	1	0	0	0	0	0	0	1475	0	0	0	0	0	0	1	0	0	0	0	1	0	0	0	1	0	0	0	0	0	0	0	0	0	0	0	0	0	1	1487		1	0	0	1	0	0
k__Bacteria;p__Firmicutes;c__Clostridia;o__Clostridiales;f__[Tissierellaceae];g__;s__	0	0	1	0	0	0	0	1	0	0	1472	0	0	0	0	0	0	0	0	0	0	0	0	0	0	0	0	0	0	0	0	0	0	0	0	0	0	2	0	0	0	1476		0	0	1	0	0	0
k__Bacteria;p__Firmicutes;c__Bacilli;o__Lactobacillales;f__Streptococcaceae;g__;s__	5	1	2	0	1	1	0	0	0	0	8	8	3	0	1	4	3	0	1	1	2	122	43	47	42	11	19	32	27	13	52	237	211	44	79	28	20	15	51	21	77	1232		1	1	1	0	1	1
k__Bacteria;p__Bacteroidetes;c__Bacteroidia;o__Bacteroidales;f__Prevotellaceae;g__Prevotella;s__nigrescens	0	0	0	2	0	0	0	0	1	0	0	537	330	9	195	3	0	0	1	0	0	0	0	0	0	0	0	0	1	0	0	0	2	0	1	0	0	0	0	0	0	1082		0	0	0	1	0	0
k__Bacteria;p__Proteobacteria;c__Epsilonproteobacteria;o__Campylobacterales;f__Campylobacteraceae;g__Campylobacter;s__rectus	17	0	0	0	1	0	0	0	1	0	176	8	29	20	17	8	8	6	2	99	608	0	0	4	0	0	0	1	0	0	0	0	1	0	0	1	0	0	0	1	0	1008		1	0	0	0	1	0
k__Bacteria;p__Fusobacteria;c__Fusobacteriia;o__Fusobacteriales;f__Leptotrichiaceae;g__;s__	0	0	0	0	0	0	0	0	0	0	1001	0	0	0	2	1	0	0	0	0	0	0	1	0	0	1	0	0	0	0	0	0	0	0	0	0	0	0	0	0	0	1006		0	0	0	0	0	0
k__Bacteria;p__Firmicutes;c__Clostridia;o__Clostridiales;f__Peptostreptococcaceae;g__;s__	7	0	1	0	0	0	0	0	0	0	837	0	0	0	0	0	0	0	0	0	0	1	0	1	0	0	1	0	0	0	1	0	1	0	0	0	0	0	0	0	0	850		1	0	1	0	0	0
k__Bacteria;p__Proteobacteria;c__Deltaproteobacteria;o__Desulfobacterales;f__Desulfobulbaceae;g__Desulfobulbus;s__	0	0	0	0	0	0	0	0	0	0	843	0	0	0	0	0	0	0	0	0	0	0	0	1	0	0	0	0	0	0	0	0	0	0	0	0	0	0	0	0	0	844		0	0	0	0	0	0
k__Bacteria;p__Bacteroidetes;c__Bacteroidia;o__Bacteroidales;f__Porphyromonadaceae;g__Paludibacter;s__	1	0	0	0	0	1	0	0	0	0	781	0	0	0	0	0	0	0	0	0	0	1	0	0	1	0	1	0	0	0	0	0	0	1	0	1	1	0	0	0	0	789		1	0	0	0	0	1
k__Bacteria;p__Firmicutes;c__Erysipelotrichi;o__Erysipelotrichales;f__Erysipelotrichaceae;g__Bulleidia;s__moorei	12	2	17	6	12	92	22	69	38	23	1	8	1	331	0	127	0	0	0	0	0	0	0	0	0	0	0	0	0	2	0	0	0	0	2	0	1	1	1	1	0	769		1	1	1	1	1	1
k__Bacteria;p__Firmicutes;c__Clostridia;o__Clostridiales;f__[Mogibacteriaceae];g__Mogibacterium;s__	0	1	10	1	2	0	1	1	0	0	711	1	0	0	0	5	9	1	0	0	0	0	0	0	0	0	0	1	0	1	0	0	0	0	0	0	0	1	0	1	0	747		0	1	1	1	1	0
k__Bacteria;p__Firmicutes;c__Clostridia;o__Clostridiales;f__[Acidaminobacteraceae];g__;s__	0	0	0	0	0	0	0	0	0	1	582	0	0	0	0	0	0	0	0	0	0	0	0	0	0	0	0	0	0	0	0	0	0	1	0	0	0	1	0	0	0	585		0	0	0	0	0	0
k__Bacteria;p__Proteobacteria;c__Gammaproteobacteria;o__Pasteurellales;f__Pasteurellaceae;g__Haemophilus;s__parainfluenzae	219	2	3	7	7	8	3	0	6	0	2	2	0	0	2	0	0	1	0	0	0	16	198	0	0	0	0	2	1	4	4	6	11	3	4	0	2	11	5	3	0	532		1	1	1	1	1	1
k__Bacteria;p__Actinobacteria;c__Actinobacteria;o__Actinomycetales;f__Actinomycetaceae;g__Actinomyces;s__	10	2	0	2	0	0	0	1	0	1	60	0	2	1	1	2	15	4	44	0	1	23	25	35	10	5	4	6	6	8	1	33	96	24	6	7	8	8	14	26	9	500		1	1	0	1	0	0
k__Bacteria;p__Firmicutes;c__Clostridia;o__Clostridiales;f__Clostridiaceae;g__;s__	39	4	17	8	10	24	26	8	15	5	0	22	14	3	47	27	0	0	0	0	0	0	0	0	0	0	0	0	0	0	0	0	0	0	0	0	0	0	0	0	0	269		1	1	1	1	1	1
k__Bacteria;p__Firmicutes;c__Clostridia;o__Clostridiales;f__;g__;s__	0	0	0	0	0	0	0	0	0	0	250	0	0	0	0	0	0	0	0	0	1	0	1	1	0	0	1	0	0	0	0	0	0	2	1	2	0	0	0	2	3	264		0	0	0	0	0	0
k__Bacteria;p__Firmicutes;c__Clostridia;o__Clostridiales;f__Lachnospiraceae;g__Catonella;s__	20	6	0	1	7	40	0	0	0	0	45	13	41	1	34	11	0	0	0	0	0	0	0	0	0	0	0	0	0	0	0	0	2	3	0	0	1	0	0	0	1	226		1	1	0	1	1	1
k__Bacteria;p__Fusobacteria;c__Fusobacteriia;o__Fusobacteriales;f__Leptotrichiaceae;g__Leptotrichia;s__	0	1	6	3	2	2	2	0	2	2	30	8	5	10	6	1	2	1	1	0	1	22	9	7	2	3	2	8	16	5	6	6	6	1	12	4	12	0	1	4	6	217		0	1	1	1	1	1
k__Bacteria;p__Actinobacteria;c__Actinobacteria;o__Actinomycetales;f__Micrococcaceae;g__Rothia;s__mucilaginosa	5	5	1	6	3	4	0	2	7	1	34	13	22	2	1	0	1	0	1	1	0	5	2	7	5	14	2	15	2	6	8	1	4	0	2	1	3	11	9	5	0	211		1	1	1	1	1	1
k__Bacteria;p__Firmicutes;c__Clostridia;o__Clostridiales;f__Peptococcaceae;g__Peptococcus;s__	0	0	0	0	0	0	0	0	0	0	205	0	0	0	0	0	0	0	0	0	0	0	0	0	0	0	0	0	0	0	0	0	0	0	0	0	0	0	0	0	0	205		0	0	0	0	0	0
k__Bacteria;p__Spirochaetes;c__Spirochaetes;o__Spirochaetales;f__Spirochaetaceae;g__Treponema;s__socranskii	0	0	0	0	0	0	0	0	1	0	183	0	0	0	10	1	0	0	0	0	2	0	0	0	0	0	1	1	0	0	0	0	0	0	0	0	0	0	0	1	1	201		0	0	0	0	0	0
k__Bacteria;p__Firmicutes;c__Bacilli;o__Gemellales;f__Gemellaceae;g__Gemella;s__	2	4	1	0	4	1	0	0	0	0	158	1	0	0	6	0	0	0	0	0	0	0	3	3	1	0	1	6	0	1	0	0	3	1	1	0	0	0	1	0	0	198		1	1	1	0	1	1
k__Bacteria;p__Spirochaetes;c__Spirochaetes;o__Spirochaetales;f__Spirochaetaceae;g__Treponema;s__amylovorum	0	0	0	0	0	0	0	0	0	0	196	0	0	0	0	0	0	1	0	0	0	0	0	0	0	0	0	0	0	0	0	0	0	0	0	0	0	0	0	0	0	197		0	0	0	0	0	0
k__Bacteria;p__Firmicutes;c__Bacilli;o__Lactobacillales;f__Lactobacillaceae;g__Lactobacillus;s__	0	0	0	2	0	3	2	3	0	0	0	4	50	11	30	5	15	15	5	17	25	1	0	0	0	0	0	0	0	0	0	0	0	1	0	0	0	0	1	0	0	190		0	0	0	1	0	1
k__Bacteria;p__Firmicutes;c__Bacilli;o__Gemellales;f__Gemellaceae;g__;s__	5	2	0	1	0	0	0	0	0	0	145	0	0	1	1	0	0	0	0	0	0	3	0	0	0	0	0	2	0	2	0	0	0	0	0	1	0	0	1	0	0	164		1	1	0	1	0	0
k__Bacteria;p__Proteobacteria;c__Deltaproteobacteria;o__Desulfovibrionales;f__Desulfomicrobiaceae;g__Desulfomicrobium;s__orale	0	0	0	0	0	0	0	0	0	0	149	0	0	0	0	0	0	0	0	0	0	0	0	0	0	0	0	0	0	0	0	0	0	0	0	0	0	0	0	0	0	149		0	0	0	0	0	0
k__Bacteria;p__TM7;c__TM7-3;o__CW040;f__F16;g__;s__	0	0	0	0	0	0	0	0	0	0	0	17	56	3	70	2	0	0	0	0	0	0	0	0	0	0	0	0	0	0	0	0	0	0	0	0	0	0	0	0	0	148		0	0	0	0	0	0
k__Bacteria;p__Bacteroidetes;c__Bacteroidia;o__Bacteroidales;f__[Paraprevotellaceae];g__[Prevotella];s__	12	1	3	0	0	1	2	1	0	0	0	15	47	3	28	4	0	0	0	0	0	0	0	3	2	0	1	1	0	0	4	0	0	5	0	1	0	0	0	0	1	135		1	1	1	0	0	1
k__Bacteria;p__Proteobacteria;c__Betaproteobacteria;o__Neisseriales;f__Neisseriaceae;g__Neisseria;s__subflava	1	4	4	1	1	4	3	1	7	0	0	0	0	2	2	0	0	0	0	0	0	3	2	2	3	0	2	5	0	15	0	0	4	1	0	1	1	28	6	0	2	105		1	1	1	1	1	1
k__Bacteria;p__Bacteroidetes;c__Bacteroidia;o__Bacteroidales;f__;g__;s__	1	0	1	3	0	1	1	0	1	0	77	0	0	0	1	0	0	0	0	1	0	0	1	0	3	0	0	3	1	1	0	0	1	1	1	0	0	1	0	0	0	100		1	0	1	1	0	1
k__Bacteria;p__Proteobacteria;c__Gammaproteobacteria;o__Pasteurellales;f__Pasteurellaceae;g__Aggregatibacter;s__	26	0	0	0	0	0	0	0	0	0	55	0	1	0	1	0	0	0	0	0	0	0	0	0	1	0	1	1	0	0	0	1	0	0	0	1	0	0	0	1	1	90		1	0	0	0	0	0
k__Bacteria;p__Proteobacteria;c__Betaproteobacteria;o__Neisseriales;f__Neisseriaceae;g__Eikenella;s__	1	0	0	0	0	0	0	0	0	0	75	0	0	0	0	0	0	0	0	0	0	0	0	0	0	0	0	0	0	0	0	1	10	1	0	0	0	0	0	0	0	88		1	0	0	0	0	0
k__Bacteria;p__Bacteroidetes;c__Bacteroidia;o__Bacteroidales;f__[Paraprevotellaceae];g__[Prevotella];s__tannerae	72	0	0	0	0	0	1	0	0	0	3	0	0	0	0	0	0	0	1	0	0	0	0	0	0	0	4	0	0	1	0	0	2	0	0	0	0	0	0	0	0	84		1	0	0	0	0	0
k__Bacteria;p__Tenericutes;c__Mollicutes;o__Acholeplasmatales;f__Acholeplasmataceae;g__Acholeplasma;s__	0	0	0	0	0	0	0	0	0	0	75	0	0	0	0	0	0	0	0	0	0	0	0	0	0	0	0	0	0	0	0	0	0	0	0	0	0	0	0	0	0	75		0	0	0	0	0	0
k__Bacteria;p__Actinobacteria;c__Actinobacteria;o__Actinomycetales;f__Micrococcaceae;g__Rothia;s__dentocariosa	0	1	0	0	1	0	0	0	1	0	24	4	0	0	10	0	1	2	1	0	0	6	0	0	0	0	3	5	0	0	2	1	1	2	0	3	2	0	0	1	0	71		0	1	0	0	1	0
k__Bacteria;p__Firmicutes;c__Erysipelotrichi;o__Erysipelotrichales;f__Erysipelotrichaceae;g__Bulleidia;s__	0	0	0	0	0	0	0	0	1	0	67	0	0	0	0	0	0	0	0	0	0	0	0	1	0	0	0	0	0	0	0	0	0	0	0	0	0	0	0	0	0	69		0	0	0	0	0	0
k__Bacteria;p__TM7;c__TM7-3;o__;f__;g__;s__	8	0	1	2	0	0	0	0	0	0	30	0	0	0	0	0	0	1	0	0	0	15	0	1	0	1	0	0	0	0	0	0	0	0	1	2	1	1	3	0	2	69		1	0	1	1	0	0
k__Bacteria;p__Actinobacteria;c__Coriobacteriia;o__Coriobacteriales;f__Coriobacteriaceae;g__Slackia;s__	1	1	4	0	0	3	1	3	0	0	1	0	0	0	0	0	0	0	2	1	0	0	0	3	2	2	2	3	3	1	4	5	6	3	3	3	4	1	1	4	1	68		1	1	1	0	0	1
k__Bacteria;p__Tenericutes;c__Mollicutes;o__Mycoplasmatales;f__Mycoplasmataceae;g__Mycoplasma;s__	1	0	0	0	0	0	0	0	0	0	57	0	0	0	0	0	0	0	0	0	0	0	0	0	0	0	0	0	1	0	0	0	1	0	0	0	0	0	0	0	0	60		1	0	0	0	0	0
k__Bacteria;p__Proteobacteria;c__Gammaproteobacteria;o__Enterobacteriales;f__Enterobacteriaceae;g__;s__	2	1	2	1	0	0	1	5	1	0	0	1	0	1	0	2	3	1	0	2	1	1	1	1	3	0	0	0	1	0	3	3	2	2	1	3	2	4	1	3	4	59		1	1	1	1	0	0
k__Bacteria;p__Actinobacteria;c__Actinobacteria;o__Actinomycetales;f__Corynebacteriaceae;g__Corynebacterium;s__	0	1	0	0	0	0	0	0	0	0	5	0	1	0	0	5	9	6	1	15	10	1	0	0	0	0	0	1	0	0	0	2	0	0	0	0	0	0	0	0	0	57		0	1	0	0	0	0
k__Bacteria;p__Firmicutes;c__Bacilli;o__Lactobacillales;f__Streptococcaceae;g__Streptococcus;s__sobrinus	0	0	0	0	0	0	0	0	0	0	0	0	0	0	0	0	0	0	0	0	0	0	0	7	13	2	4	4	10	2	1	0	0	0	0	0	3	7	2	1	1	57		0	0	0	0	0	0
k__Bacteria;p__Bacteroidetes;c__Bacteroidia;o__Bacteroidales;f__[Odoribacteraceae];g__Odoribacter;s__	0	0	0	0	0	0	0	0	0	0	47	0	0	0	0	0	0	0	0	0	0	0	0	0	0	0	0	0	0	0	0	0	0	0	0	0	0	0	0	0	0	47		0	0	0	0	0	0
k__Bacteria;p__Firmicutes;c__Clostridia;o__Clostridiales;f__Veillonellaceae;g__Schwartzia;s__	0	0	0	0	0	0	0	0	0	0	37	5	0	0	0	0	0	1	0	0	0	0	0	0	0	0	1	0	0	0	0	0	0	0	0	0	0	1	0	0	0	45		0	0	0	0	0	0
k__Bacteria;p__Actinobacteria;c__Coriobacteriia;o__Coriobacteriales;f__Coriobacteriaceae;g__;s__	4	0	0	1	2	4	19	1	2	2	0	1	0	0	0	0	0	2	0	0	0	0	0	0	0	0	1	0	0	0	0	0	0	1	1	0	0	0	0	0	0	41		1	0	0	1	1	1
k__Bacteria;p__Firmicutes;c__Clostridia;o__Clostridiales;f__Clostridiaceae;g__Clostridium;s__	1	4	2	1	0	7	6	2	0	7	9	0	0	0	0	0	0	0	0	0	0	0	0	0	0	0	0	0	0	0	0	0	0	0	0	0	0	0	0	0	0	39		1	1	1	1	0	1
k__Bacteria;p__Firmicutes;c__Clostridia;o__Clostridiales;f__Eubacteriaceae;g__Pseudoramibacter_Eubacterium;s__	0	2	2	0	2	0	0	0	0	0	28	0	0	0	0	0	0	0	0	1	0	0	0	0	1	0	0	1	0	0	1	0	0	0	0	0	0	1	0	0	0	39		0	1	1	0	1	0
k__Bacteria;p__Actinobacteria;c__Actinobacteria;o__Bifidobacteriales;f__Bifidobacteriaceae;g__Bifidobacterium;s__	0	0	0	0	0	2	3	0	0	0	0	25	0	0	0	3	1	0	0	1	1	0	0	0	0	0	0	0	0	0	0	0	0	0	0	0	0	0	0	0	0	36		0	0	0	0	0	1
k__Bacteria;p__Actinobacteria;c__Actinobacteria;o__Bifidobacteriales;f__Bifidobacteriaceae;g__Bifidobacterium;s__longum	2	0	1	0	0	27	3	0	0	0	0	0	0	0	0	0	0	0	0	0	0	0	0	0	0	0	0	0	0	0	0	0	0	0	0	0	1	0	0	0	0	34		1	0	1	0	0	1
k__Bacteria;p__Proteobacteria;c__Alphaproteobacteria;o__Sphingomonadales;f__Sphingomonadaceae;g__Sphingomonas;s__	0	1	1	2	0	0	0	0	1	2	1	0	1	2	0	0	0	2	1	0	2	0	1	2	0	1	2	0	1	0	1	1	2	1	0	0	0	0	0	0	5	33		0	1	1	1	0	0
k__Bacteria;p__Proteobacteria;c__Gammaproteobacteria;o__Enterobacteriales;f__Enterobacteriaceae;g__Proteus;s__	0	0	0	0	0	0	1	0	3	1	0	1	2	1	1	0	0	1	2	1	1	1	0	0	0	0	2	0	0	1	1	0	0	1	0	0	1	3	2	0	2	29		0	0	0	0	0	0
k__Bacteria;p__Firmicutes;c__Clostridia;o__Clostridiales;f__Peptostreptococcaceae;g__Peptostreptococcus;s__	6	1	1	1	0	1	2	0	1	0	0	1	3	1	8	2	0	0	0	0	0	0	0	0	0	0	0	0	0	0	0	0	0	0	0	0	0	0	0	0	0	28		1	1	1	1	0	1
k__Bacteria;p__Proteobacteria;c__Betaproteobacteria;o__Neisseriales;f__Neisseriaceae;g__Neisseria;s__	1	0	0	3	1	0	0	0	0	0	0	2	0	0	0	0	0	0	0	0	0	6	0	0	1	0	0	0	0	0	2	0	0	1	1	0	4	0	3	0	0	25		1	0	0	1	1	0
k__Bacteria;p__Actinobacteria;c__Actinobacteria;o__Actinomycetales;f__Micrococcaceae;g__Rothia;s__aeria	0	2	0	1	0	0	0	0	0	0	0	1	1	0	0	1	0	0	0	0	0	4	1	0	0	0	2	0	0	1	0	4	2	0	0	0	0	0	1	0	2	23		0	1	0	1	0	0
k__Bacteria;p__Proteobacteria;c__Betaproteobacteria;o__Neisseriales;f__Neisseriaceae;g__;s__	0	2	0	0	2	0	0	0	0	0	6	0	1	0	0	2	0	1	0	0	0	0	0	0	0	0	1	0	1	1	0	0	1	0	0	0	0	0	3	0	2	23		0	1	0	0	1	0
k__Bacteria;p__Chloroflexi;c__Anaerolineae;o__Anaerolineales;f__Anaerolinaceae;g__SHD-231;s__	0	0	0	0	0	0	0	0	0	0	19	0	0	0	0	0	0	0	0	0	0	0	0	0	0	0	0	0	0	0	0	0	0	0	0	0	0	0	0	0	0	19		0	0	0	0	0	0
k__Bacteria;p__Proteobacteria;c__Betaproteobacteria;o__Burkholderiales;f__Burkholderiaceae;g__Lautropia;s__	0	0	0	0	0	0	0	0	0	0	0	0	2	0	0	0	0	0	0	0	0	6	0	0	0	0	0	0	0	0	0	1	6	0	0	0	0	0	0	0	2	17		0	0	0	0	0	0
k__Bacteria;p__Bacteroidetes;c__Bacteroidia;o__Bacteroidales;f__Prevotellaceae;g__Prevotella;s__nanceiensis	0	0	1	0	0	0	1	0	1	0	0	0	0	0	0	0	0	0	0	0	0	0	0	0	3	0	0	0	0	1	0	0	7	0	0	0	0	1	0	1	0	16		0	0	1	0	0	0
k__Bacteria;p__Firmicutes;c__Bacilli;o__Lactobacillales;f__Streptococcaceae;g__Streptococcus;s__infantis	0	0	0	1	0	0	0	0	0	0	0	0	0	0	0	0	0	0	0	0	0	0	0	0	0	0	0	0	0	0	0	4	2	0	0	0	0	1	1	2	2	13		0	0	0	1	0	0
k__Bacteria;p__Firmicutes;c__Bacilli;o__Lactobacillales;f__Lactobacillaceae;g__Lactobacillus;s__zeae	0	0	0	0	0	0	0	1	0	0	0	0	3	2	1	1	1	0	1	1	1	0	0	0	0	0	0	0	0	0	0	0	0	0	0	0	0	0	0	0	0	12		0	0	0	0	0	0
k__Bacteria;p__Bacteroidetes;c__Flavobacteriia;o__Flavobacteriales;f__[Weeksellaceae];g__;s__	0	0	0	0	0	0	0	0	1	0	3	0	0	0	0	0	0	0	0	0	0	2	0	0	2	0	0	0	0	0	0	0	1	0	2	0	0	0	0	0	0	11		0	0	0	0	0	0
k__Bacteria;p__Proteobacteria;c__Gammaproteobacteria;o__Pasteurellales;f__Pasteurellaceae;g__Actinobacillus;s__parahaemolyticus	0	0	1	4	0	0	0	0	0	0	0	0	0	0	0	0	0	0	0	0	0	0	0	0	3	0	1	0	0	0	0	0	1	0	0	0	0	0	0	1	0	11		0	0	1	1	0	0
k__Bacteria;p__Firmicutes;c__Bacilli;o__Lactobacillales;f__Enterococcaceae;g__;s__	0	0	0	0	0	0	0	0	0	0	0	1	1	0	0	0	4	1	1	2	0	0	0	0	0	0	0	0	0	0	0	0	0	0	0	0	0	0	0	0	0	10		0	0	0	0	0	0
k__Bacteria;p__Proteobacteria;c__Alphaproteobacteria;o__Rhizobiales;f__Phyllobacteriaceae;g__;s__	0	0	0	0	0	0	0	0	0	0	0	0	1	0	0	0	0	0	0	0	1	1	0	0	0	0	1	0	0	0	3	0	0	0	0	0	1	0	0	2	0	10		0	0	0	0	0	0
k__Bacteria;p__Bacteroidetes;c__Bacteroidia;o__Bacteroidales;f__p-2534-18B5;g__BE24;s__	0	0	0	0	0	0	0	0	0	0	9	0	0	0	0	0	0	0	0	0	0	0	0	0	0	0	0	0	0	0	0	0	0	0	0	0	0	0	0	0	0	9		0	0	0	0	0	0
k__Bacteria;p__Bacteroidetes;c__Flavobacteriia;o__Flavobacteriales;f__Flavobacteriaceae;g__Capnocytophaga;s__ochracea	0	0	0	0	0	0	0	1	0	0	7	0	0	0	0	0	0	0	0	0	0	0	0	0	0	0	0	0	0	0	0	0	0	0	0	0	0	0	0	0	0	8		0	0	0	0	0	0
k__Bacteria;p__Proteobacteria;c__Gammaproteobacteria;o__Pseudomonadales;f__Moraxellaceae;g__Moraxella;s__	0	0	0	0	1	0	0	0	0	0	1	0	0	0	0	0	0	0	0	1	0	0	0	0	0	0	0	0	0	0	0	0	0	0	0	1	0	2	1	0	1	8		0	0	0	0	1	0
k__Bacteria;p__Cyanobacteria;c__Oscillatoriophycideae;o__Chroococcales;f__Xenococcaceae;g__;s__	0	0	0	1	0	0	0	0	0	0	0	0	0	0	0	0	0	0	0	1	1	0	0	0	1	0	0	0	0	0	0	0	0	0	2	0	0	0	0	1	0	7		0	0	0	1	0	0
k__Bacteria;p__Proteobacteria;c__Gammaproteobacteria;o__Enterobacteriales;f__Enterobacteriaceae;g__Klebsiella;s__	1	0	0	0	0	0	0	0	0	1	0	0	1	0	0	0	0	0	0	0	0	0	0	0	0	1	0	0	1	0	0	1	0	0	1	0	0	0	0	0	0	7		1	0	0	0	0	0
k__Bacteria;p__Cyanobacteria;c__Chloroplast;o__Streptophyta;f__;g__;s__	0	0	0	0	0	0	0	0	0	0	0	0	0	0	2	0	0	0	0	0	0	4	0	0	0	0	0	0	0	0	0	0	0	0	0	0	0	0	0	0	0	6		0	0	0	0	0	0
k__Bacteria;p__Proteobacteria;c__Gammaproteobacteria;o__Xanthomonadales;f__Xanthomonadaceae;g__;s__	0	0	0	0	0	0	1	0	0	0	0	0	1	1	0	0	0	0	0	0	0	0	0	0	1	0	0	0	0	1	0	0	0	0	0	0	1	0	0	0	0	6		0	0	0	0	0	0
k__Bacteria;p__SR1;c__;o__;f__;g__;s__	0	0	2	0	0	0	1	0	0	0	1	0	0	0	0	0	0	0	0	0	0	0	0	0	2	0	0	0	0	0	0	0	0	0	0	0	0	0	0	0	0	6		0	0	1	0	0	0
k__Bacteria;p__Bacteroidetes;c__Bacteroidia;o__Bacteroidales;f__Prevotellaceae;g__Prevotella;s__pallens	0	0	1	0	0	0	0	0	0	1	0	0	0	0	0	0	0	0	0	0	0	0	0	0	0	0	0	0	0	1	0	0	0	2	0	0	0	0	0	0	0	5		0	0	1	0	0	0
k__Bacteria;p__Proteobacteria;c__Gammaproteobacteria;o__Cardiobacteriales;f__Cardiobacteriaceae;g__Cardiobacterium;s__	1	2	0	0	0	0	0	0	0	0	0	0	0	0	0	0	0	0	0	0	0	0	0	0	0	2	0	0	0	0	0	0	0	0	0	0	0	0	0	0	0	5		1	1	0	0	0	0
k__Bacteria;p__Proteobacteria;c__Gammaproteobacteria;o__Pasteurellales;f__Pasteurellaceae;g__Actinobacillus;s__	0	0	0	2	0	1	0	0	1	0	0	0	0	0	0	0	0	0	0	0	0	0	1	0	0	0	0	0	0	0	0	0	0	0	0	0	0	0	0	0	0	5		0	0	0	1	0	1
k__Bacteria;p__Proteobacteria;c__Gammaproteobacteria;o__Pasteurellales;f__Pasteurellaceae;g__Haemophilus;s__	1	1	0	0	0	0	0	0	0	0	1	0	0	0	0	0	0	0	0	0	0	0	0	0	0	0	0	0	0	0	0	0	2	0	0	0	0	0	0	0	0	5		1	1	0	0	0	0
k__Bacteria;p__Synergistetes;c__Synergistia;o__Synergistales;f__Dethiosulfovibrionaceae;g__Pyramidobacter;s__piscolens	0	0	2	0	0	0	1	0	0	0	0	0	0	0	0	0	0	0	0	0	0	0	0	0	0	0	0	0	0	0	0	0	0	0	0	1	0	0	0	0	1	5		0	0	1	0	0	0
k__Bacteria;p__Actinobacteria;c__Actinobacteria;o__Actinomycetales;f__Propionibacteriaceae;g__;s__	0	0	0	0	0	0	0	0	0	0	0	0	0	0	0	0	0	0	4	0	0	0	0	0	0	0	0	0	0	0	0	0	0	0	0	0	0	0	0	0	0	4		0	0	0	0	0	0
k__Bacteria;p__Actinobacteria;c__Actinobacteria;o__Bifidobacteriales;f__Bifidobacteriaceae;g__Alloscardovia;s__	4	0	0	0	0	0	0	0	0	0	0	0	0	0	0	0	0	0	0	0	0	0	0	0	0	0	0	0	0	0	0	0	0	0	0	0	0	0	0	0	0	4		1	0	0	0	0	0
k__Bacteria;p__Actinobacteria;c__Coriobacteriia;o__Coriobacteriales;f__Coriobacteriaceae;g__Atopobium;s__rimae	0	0	0	0	0	0	0	0	0	0	0	0	0	0	0	0	0	0	0	0	0	0	0	0	0	0	0	1	1	0	1	0	0	0	0	1	0	0	0	0	0	4		0	0	0	0	0	0
k__Bacteria;p__Bacteroidetes;c__Flavobacteriia;o__Flavobacteriales;f__[Weeksellaceae];g__Chryseobacterium;s__	0	0	1	0	0	0	0	0	0	0	0	0	0	0	0	0	0	1	0	0	0	0	0	0	0	1	0	0	0	0	0	0	0	0	0	0	0	0	0	0	0	3		0	0	1	0	0	0
k__Bacteria;p__Firmicutes;c__Bacilli;o__Bacillales;f__Staphylococcaceae;g__Staphylococcus;s__	0	0	0	0	0	1	0	0	0	0	0	0	0	0	0	0	0	0	0	0	0	0	0	1	0	0	0	0	0	0	0	0	0	0	0	0	0	0	1	0	0	3		0	0	0	0	0	1
k__Bacteria;p__Firmicutes;c__Clostridia;o__Clostridiales;f__[Tissierellaceae];g__ph2;s__	1	0	1	0	1	0	0	0	0	0	0	0	0	0	0	0	0	0	0	0	0	0	0	0	0	0	0	0	0	0	0	0	0	0	0	0	0	0	0	0	0	3		1	0	1	0	1	0
k__Bacteria;p__Proteobacteria;c__Betaproteobacteria;o__Burkholderiales;f__Comamonadaceae;g__;s__	0	0	0	0	0	0	0	0	0	0	0	0	0	0	0	0	0	0	3	0	0	0	0	0	0	0	0	0	0	0	0	0	0	0	0	0	0	0	0	0	0	3		0	0	0	0	0	0
k__Bacteria;p__Proteobacteria;c__Gammaproteobacteria;o__Pseudomonadales;f__Pseudomonadaceae;g__Pseudomonas;s__	0	0	1	0	0	0	0	0	0	0	0	0	0	0	0	0	0	0	0	0	0	0	0	0	0	0	0	0	0	1	0	0	0	1	0	0	0	0	0	0	0	3		0	0	1	0	0	0
k__Bacteria;p__Actinobacteria;c__Actinobacteria;o__Actinomycetales;f__Micrococcaceae;g__Micrococcus;s__	0	0	0	0	0	0	0	0	0	0	0	0	0	0	0	0	0	0	2	0	0	0	0	0	0	0	0	0	0	0	0	0	0	0	0	0	0	0	0	0	0	2		0	0	0	0	0	0
k__Bacteria;p__Chloroflexi;c__Anaerolineae;o__Caldilineales;f__Caldilineaceae;g__;s__	0	0	0	0	0	0	0	0	0	0	0	0	0	0	0	0	0	1	0	0	0	0	0	0	0	0	0	0	0	0	1	0	0	0	0	0	0	0	0	0	0	2		0	0	0	0	0	0
k__Bacteria;p__Proteobacteria;c__Deltaproteobacteria;o__Desulfovibrionales;f__Desulfovibrionaceae;g__Desulfovibrio;s__	0	0	0	0	0	0	0	0	1	0	0	0	0	0	0	0	0	0	0	0	0	0	0	0	0	0	0	0	0	0	0	0	0	0	0	0	0	0	0	1	0	2		0	0	0	0	0	0
k__Bacteria;p__TM7;c__TM7-3;o__I025;f__Rs-045;g__;s__	0	0	0	0	0	0	0	0	0	0	0	0	0	0	1	0	0	0	0	0	0	0	0	0	0	0	0	1	0	0	0	0	0	0	0	0	0	0	0	0	0	2		0	0	0	0	0	0
k__Bacteria;p__Tenericutes;c__RF3;o__ML615J-28;f__;g__;s__	0	0	0	0	0	0	0	0	0	0	2	0	0	0	0	0	0	0	0	0	0	0	0	0	0	0	0	0	0	0	0	0	0	0	0	0	0	0	0	0	0	2		0	0	0	0	0	0
k__Bacteria;p__Actinobacteria;c__Actinobacteria;o__Actinomycetales;f__Actinomycetaceae;g__;s__	0	0	0	0	0	0	0	0	0	0	0	0	0	0	0	0	0	0	1	0	0	0	0	0	0	0	0	0	0	0	0	0	0	0	0	0	0	0	0	0	0	1		0	0	0	0	0	0
k__Bacteria;p__Actinobacteria;c__Actinobacteria;o__Actinomycetales;f__Actinomycetaceae;g__Mobiluncus;s__	0	0	0	0	0	0	0	0	0	0	0	0	0	0	0	0	0	0	0	0	0	1	0	0	0	0	0	0	0	0	0	0	0	0	0	0	0	0	0	0	0	1		0	0	0	0	0	0
k__Bacteria;p__Actinobacteria;c__Actinobacteria;o__Actinomycetales;f__Intrasporangiaceae;g__Janibacter;s__	0	0	0	0	0	0	0	0	0	0	0	0	0	0	0	0	1	0	0	0	0	0	0	0	0	0	0	0	0	0	0	0	0	0	0	0	0	0	0	0	0	1		0	0	0	0	0	0
k__Bacteria;p__Actinobacteria;c__Actinobacteria;o__Actinomycetales;f__Micrococcaceae;g__;s__	0	0	0	0	0	0	0	0	0	0	0	0	0	0	0	0	0	0	0	0	0	0	0	0	0	0	0	0	0	0	0	0	0	0	0	0	0	0	0	0	1	1		0	0	0	0	0	0
k__Bacteria;p__Actinobacteria;c__Actinobacteria;o__Actinomycetales;f__Mycobacteriaceae;g__Mycobacterium;s__	0	0	0	0	0	0	0	0	0	0	0	0	0	0	0	0	0	0	1	0	0	0	0	0	0	0	0	0	0	0	0	0	0	0	0	0	0	0	0	0	0	1		0	0	0	0	0	0
k__Bacteria;p__Bacteroidetes;c__Bacteroidia;o__Bacteroidales;f__BS11;g__;s__	0	0	0	0	0	0	0	0	0	0	0	0	0	0	1	0	0	0	0	0	0	0	0	0	0	0	0	0	0	0	0	0	0	0	0	0	0	0	0	0	0	1		0	0	0	0	0	0
k__Bacteria;p__Bacteroidetes;c__Bacteroidia;o__Bacteroidales;f__Prevotellaceae;g__Prevotella;s__copri	0	0	0	0	0	0	0	0	0	0	0	0	0	0	0	0	0	0	0	0	0	0	0	0	0	0	0	0	0	0	0	0	0	0	0	0	0	0	1	0	0	1		0	0	0	0	0	0
k__Bacteria;p__Bacteroidetes;c__[Saprospirae];o__[Saprospirales];f__Chitinophagaceae;g__Sediminibacterium;s__	0	0	0	0	0	0	0	0	0	0	0	0	0	0	0	0	0	0	0	0	0	0	0	1	0	0	0	0	0	0	0	0	0	0	0	0	0	0	0	0	0	1		0	0	0	0	0	0
k__Bacteria;p__Firmicutes;c__Clostridia;o__Clostridiales;f__Lachnospiraceae;g__Shuttleworthia;s__satelles	0	0	0	0	0	0	0	0	0	0	0	0	0	0	0	0	0	1	0	0	0	0	0	0	0	0	0	0	0	0	0	0	0	0	0	0	0	0	0	0	0	1		0	0	0	0	0	0
k__Bacteria;p__Firmicutes;c__Clostridia;o__Clostridiales;f__Veillonellaceae;g__;s__	0	0	0	0	0	0	0	0	0	0	0	0	0	0	1	0	0	0	0	0	0	0	0	0	0	0	0	0	0	0	0	0	0	0	0	0	0	0	0	0	0	1		0	0	0	0	0	0
k__Bacteria;p__Firmicutes;c__Clostridia;o__Clostridiales;f__[Tissierellaceae];g__Finegoldia;s__	0	0	0	0	0	0	0	0	0	0	0	0	0	0	0	0	0	0	0	0	1	0	0	0	0	0	0	0	0	0	0	0	0	0	0	0	0	0	0	0	0	1		0	0	0	0	0	0
k__Bacteria;p__Firmicutes;c__Erysipelotrichi;o__Erysipelotrichales;f__Erysipelotrichaceae;g__Sharpea;s__	0	0	0	0	0	0	1	0	0	0	0	0	0	0	0	0	0	0	0	0	0	0	0	0	0	0	0	0	0	0	0	0	0	0	0	0	0	0	0	0	0	1		0	0	0	0	0	0
k__Bacteria;p__Proteobacteria;c__Alphaproteobacteria;o__Rhizobiales;f__Bradyrhizobiaceae;g__Bradyrhizobium;s__	0	0	0	0	0	1	0	0	0	0	0	0	0	0	0	0	0	0	0	0	0	0	0	0	0	0	0	0	0	0	0	0	0	0	0	0	0	0	0	0	0	1		0	0	0	0	0	1
k__Bacteria;p__Proteobacteria;c__Betaproteobacteria;o__Neisseriales;f__Neisseriaceae;g__Kingella;s__	0	0	0	0	0	0	0	0	0	0	1	0	0	0	0	0	0	0	0	0	0	0	0	0	0	0	0	0	0	0	0	0	0	0	0	0	0	0	0	0	0	1		0	0	0	0	0	0
k__Bacteria;p__Proteobacteria;c__Betaproteobacteria;o__Neisseriales;f__Neisseriaceae;g__Neisseria;s__cinerea	0	0	0	0	0	0	0	0	0	0	0	0	0	0	0	0	0	0	0	0	0	1	0	0	0	0	0	0	0	0	0	0	0	0	0	0	0	0	0	0	0	1		0	0	0	0	0	0
k__Bacteria;p__Proteobacteria;c__Deltaproteobacteria;o__Desulfovibrionales;f__Desulfovibrionaceae;g__Desulfovibrio;s__D168	0	0	0	0	0	0	0	0	0	0	0	0	0	0	1	0	0	0	0	0	0	0	0	0	0	0	0	0	0	0	0	0	0	0	0	0	0	0	0	0	0	1		0	0	0	0	0	0
k__Bacteria;p__Proteobacteria;c__Epsilonproteobacteria;o__Campylobacterales;f__Helicobacteraceae;g__Wolinella;s__succinogenes	0	0	0	0	0	0	0	0	0	0	1	0	0	0	0	0	0	0	0	0	0	0	0	0	0	0	0	0	0	0	0	0	0	0	0	0	0	0	0	0	0	1		0	0	0	0	0	0
k__Bacteria;p__Proteobacteria;c__Gammaproteobacteria;o__Pseudomonadales;f__Moraxellaceae;g__Acinetobacter;s__lwoffii	0	0	0	0	0	0	1	0	0	0	0	0	0	0	0	0	0	0	0	0	0	0	0	0	0	0	0	0	0	0	0	0	0	0	0	0	0	0	0	0	0	1		0	0	0	0	0	0
k__Bacteria;p__Proteobacteria;c__Gammaproteobacteria;o__Xanthomonadales;f__Xanthomonadaceae;g__Stenotrophomonas;s__	0	0	0	0	0	0	0	0	0	0	0	0	0	0	0	0	0	0	0	0	0	0	0	0	0	0	0	1	0	0	0	0	0	0	0	0	0	0	0	0	0	1		0	0	0	0	0	0
k__Bacteria;p__TM7;c__TM7-3;o__CW040;f__;g__;s__	0	0	0	0	0	0	0	0	0	0	1	0	0	0	0	0	0	0	0	0	0	0	0	0	0	0	0	0	0	0	0	0	0	0	0	0	0	0	0	0	0	1		0	0	0	0	0	0
Sum	75308	43841	63427	54807	48727	56693	64040	69340	89000	47575	53387	36035	76079	81278	80120	64085	71315	86891	71708	76893	60084	123221	90809	94976	92569	67799	61861	79566	104659	106985	110215	94244	83234	88495	106634	108625	110297	86026	68203	86782	90198	3226031		59	50	55	49	41	43
[truncated: 35 more columns]

## Sheet: CompHOMINGS-qiime
HOMINGS	DB2.G1	DB2.G2	DB2.G3	DB2.G4	DB2.G5	DB2.G6	DB2.G7	DB2.G8	DB2.G9	DB2.G10	DB3.G0	DB3.G1	DB3.G2	DB3.G3	DB3.G4	DB3.G5	DB3.G6	DB3.G7	DB3.G8	DB3.G9	DB3.G10	HB1.G1	HB1.G2	HB1.G3	HB1.G4	HB1.G5	HB1.G6	HB1.G7	HB1.G8	HB1.G9	HB1.G10	HB2.G1	HB2.G2	HB2.G3	HB2.G4	HB2.G5	HB2.G6	HB2.G7	HB2.G8	HB2.G9	HB2.G10
Total reads	104678	61024	87273	76196	70792	69015	79999	70398	96016	50227	72119	52916	122693	109705	109035	90170	96857	124907	101842	108066	87626	164604	118421	122611	117616	84763	80073	101472	134559	134843	141610	135679	113844	111604	135702	135159	134068	110339	93676	114843	126524	4253564
Reads matched uniquely with 1 species probe	49018	29484	51919	30497	35604	28161	26138	23592	31835	20293	35620	27883	68373	48703	37277	33455	40555	46343	35282	38936	27925	76093	39688	38806	39909	28801	27896	28465	40548	39852	40926	66205	34674	31495	48780	37182	40933	30562	35059	30911	31676	1555354
Reads matched uniquely with 1 genus probe	16058	12369	17061	20950	18923	13485	12772	9109	11163	7291	11869	3395	10284	7444	17004	12508	9957	12174	10267	17441	9207	51387	21926	25738	28469	23725	18527	26812	22250	26522	27601	52767	34163	22648	14975	18295	14599	24042	19338	46580	47168	828263
Matched reads	65076	41853	68980	51447	54527	41646	38910	32701	42998	27584	47489	31278	78657	56147	54281	45963	50512	58517	45549	56377	37132	127480	61614	64544	68378	52526	46423	55277	62798	66374	68527	118972	68837	54143	63755	55477	55532	54604	54397	77491	78844	2383617
Unmatched reads	39602	19171	18293	24749	16265	27369	41089	37697	53018	22643	24630	21638	44036	53558	54754	44207	46345	66390	56293	51689	50494	37124	56807	58067	49238	32237	33650	46195	71761	68469	73083	16707	45007	57461	71947	79682	78536	55735	39279	37352	47680	1869947
# Species detected	116	88	87	84	81	80	88	68	76	64	154	83	82	72	84	65	60	61	57	55	52	60	51	68	57	47	73	64	61	59	56	56	68	54	56	61	60	53	59	54	75
	37.8322	31.4155	20.9607	32.4807	22.9758	39.6566	51.3619	53.5484	55.2179	45.0813	34.1519	40.8912	35.8912	48.82	50.2169	49.0263	47.8489	53.1515	55.2748	47.831	57.6244	22.5535	47.9704	47.3587	41.8634	38.0319	42.0242	45.5249	53.3305	50.7768	51.6086	12.3136	39.5339	51.4865	53.0184	58.9543	58.5792	50.5125	41.9307	32.5244	37.6845
QIIME	DB2G1	DB2G2	DB2G3	DB2G4	DB2G5	DB2G6	DB2G7	DB2G8	DB2G9	DB2G10	DB3G0	DB3G1	DB3G2	DB3G3	DB3G4	DB3G5	DB3G6	DB3G7	DB3G8	DB3G9	DB3G10	HB1G1	HB1G2	HB1G3	HB1G4	HB1G5	HB1G6	HB1G7	HB1G8	HB1G9	HB1G10	HB2G1	HB2G2	HB2G3	HB2G4	HB2G5	HB2G6	HB2G7	HB2G8	HB2G9	HB2G10	Row Sum
Total reads	150691	56019	79481	67376	63319	67920	75458	80842	102662	54675	61416	114075	93007	90359	99873	74593	82761	100300	83617	85942	70417	257595	100814	103861	100413	73326	67387	87418	117931	117523	123968	209974	94576	96613	117792	118087	119557	94440	78561	94459	105082	4034180
Species-level IDs (L7)	75308	43841	63427	54807	48727	56693	64040	69340	89000	47575	53387	36035	76079	81278	80120	64085	71315	86891	71708	76893	60084	123221	90809	94976	92569	67799	61861	79566	104659	106985	110215	94244	83234	88495	106634	108625	110297	86026	68203	86782	90198	3226031
Genus-level IDs (L6)	75308	43841	63427	54807	48727	56693	64040	69340	89000	47575	53387	36035	76079	81278	80120	64085	71315	86891	71708	76893	60084	123221	90809	94976	92569	67799	61861	79566	104659	106985	110215	94244	83234	88495	106634	108625	110297	86026	68203	86782	90198	3226031
Matched reads	75308	43841	63427	54807	48727	56693	64040	69340	89000	47575	53387	36035	76079	81278	80120	64085	71315	86891	71708	76893	60084	123221	90809	94976	92569	67799	61861	79566	104659	106985	110215	94244	83234	88495	106634	108625	110297	86026	68203	86782	90198	3226031
Unmatched reads	75383	12178	16054	12569	14592	11227	11418	11502	13662	7100	8029	78040	16928	9081	19753	10508	11446	13409	11909	9049	10333	134374	10005	8885	7844	5527	5526	7852	13272	10538	13753	115730	11342	8118	11158	9462	9260	8414	10358	7677	14884	808149
# Species detected	59	50	55	49	41	43	48	38	43	34	78	50	50	41	52	43	36	44	42	35	35	41	34	43	40	30	46	42	39	36	38	36	49	40	39	40	37	40	43	42	44
	50.0249	21.7391	20.1985	18.655	23.0452	16.5297	15.1316	14.2278	13.3077	12.9858	13.0731	68.4111	18.2008	10.0499	19.7781	14.0871	13.8302	13.3689	14.2423	10.5292	14.674	52.1648	9.92422	8.5547	7.81174	7.53757	8.20039	8.98213	11.254	8.96676	11.094	55.1163	11.9925	8.4026	9.47263	8.01274	7.74526	8.90936	13.1847	8.12734	14.1642
	HOMINGS	Qiime
Total reads processed	4253564	4034180
Matched reads	2383617	3226031
Unmatched reads	1869947	808149
